# Supplementary material for: Mechanistic study of the ligand controlled regioselectivity in iridium catalyzed C–H borylation of aromatic imines
Source: Royal Society of Chemistry journal article supplement (doi:10.1039/c8ra07886f), 2018-01-01
Supplement: c8ra07886f1.pdf [file c8ra07886f1.pdf]

## Supporting Information for Mechanistic study of the ligand controlled regioselectivity in Iridium catalyzed C-H borylation of aromatic imine

Yuhua Liu<sup>a#</sup>, Jipei Chen<sup>a#</sup>, Kangsheng Zhan<sup>a</sup>, Yiqiang Shen<sup>a</sup>,  
Hui Gao<sup>\*b,c</sup>, Lingmin Yao<sup>\*a</sup>

<sup>a</sup> School of physics and electronic engineering, Guangzhou University, Guangzhou, 510006, China

<sup>b</sup>Key Laboratory of Molecular Target & Clinical Pharmacology, School of Pharmaceutical Sciences & the Fifth Affiliated Hospital, Guangzhou Medical University, Guangzhou, 511436, China

<sup>c</sup> Guangzhou Institute of Energy Conversion, Chinese Academy of Sciences, Guangzhou 510640, PR China

### I. Computational Details

The calculations were conducted using Gaussian 09 program <sup>1</sup>. Geometries were optimized using the B3LYP functional <sup>2</sup>. SDD <sup>3</sup> basis set was used for Ir, a standard 6-31G(d) <sup>4</sup> basis set was used for other atoms. Frequency analyses were carried out to ensure these stationary points were at either a minimum or transition state. Solvation free energies are calculated with SMD<sup>5</sup> solvation model (solvent =tetrahydrofuran). Additional single point calculations were performed with M11L functional <sup>6</sup>. SDD basis set was employed for Ir while standard 6-311++G (d, p) <sup>4</sup> basis set level for other atoms. The solvation model for the single point calculation was the same as described above. The energies presented in this paper are the M11L-calculated single point energies added with B3LYP-optimized thermodynamic corrections.

### II. Geometry and Mulliken charge for transition states

Table 1. Mulliken charge for transferring hydrogen, related carbon atom and iridium atom on transition states TS3a, TS3b, TS3a', TS3b'

| atom | TS3a      | TS3b      | TS3a'     | TS3b'     |
|------|-----------|-----------|-----------|-----------|
| H    | -0.013700 | -0.178948 | -0.191481 | 0.231294  |
| Ir   | 0.213840  | -0.260901 | -0.401976 | 0.626415  |
| C    | 0.150718  | 0.376478  | 0.239186  | -0.574007 |

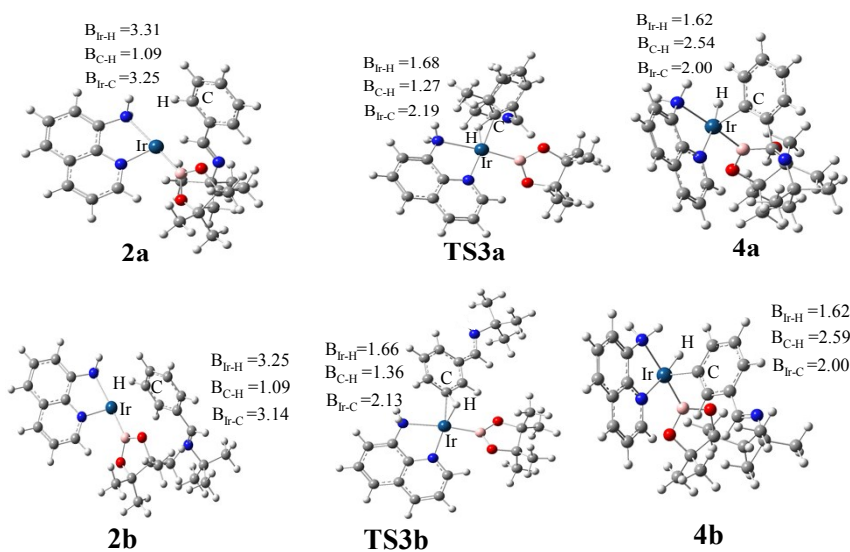

**Fig. 1** Key transition states and intermediates in Ir(I)/AQ catalyzed C-H activation in path I

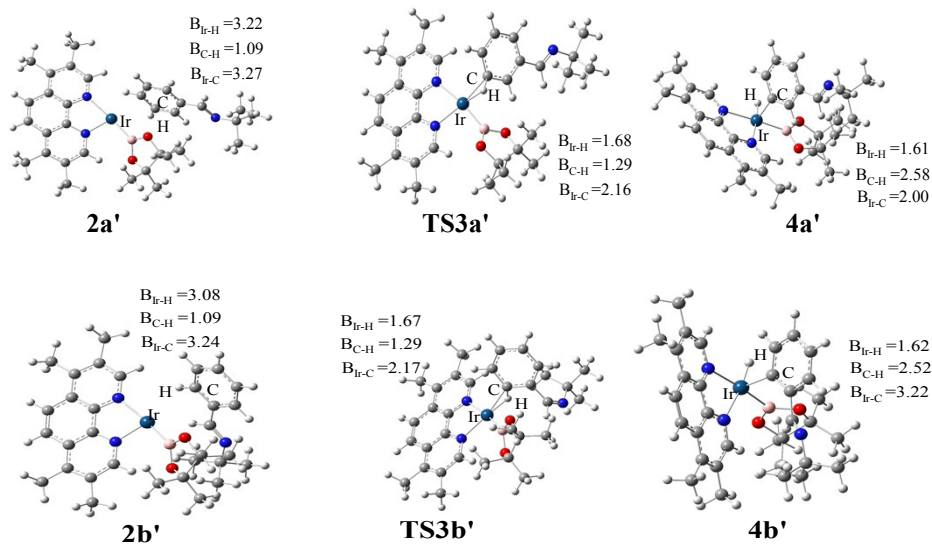

**Fig. 2** Key transition states and intermediates in Ir(I)/TMP system catalyzed C-H activation in path I'

II. Cartesian coordinates and energies from the B3LYP-D3 method and electronic energies for the M11Ls method.

1

Number of Negative Frequencies = 0

|   |          |          |          |   |          |          |          |
|---|----------|----------|----------|---|----------|----------|----------|
| B | -1.64742 | -0.25456 | -0.0008  | C | 3.25729  | -0.83196 | 0.00227  |
| C | 0.7816   | 1.84085  | -0.00191 | C | 4.62887  | -0.99251 | -0.00586 |
| H | -0.2965  | 1.91587  | -0.01007 | N | 1.27877  | 0.5848   | -0.00191 |
| C | 1.58439  | 2.99195  | -0.01293 | N | 2.34279  | -1.95329 | 0.0189   |
| C | 3.53839  | 1.60184  | -0.01899 | O | -2.08245 | 1.04382  | -0.36048 |
| C | 2.68092  | 0.45947  | -0.0058  | O | -2.7928  | -1.00788 | 0.3461   |

|                                                          |          |          |          |   |          |          |          |         |
|----------------------------------------------------------|----------|----------|----------|---|----------|----------|----------|---------|
| C                                                        | 4.9442   | 1.40273  | -0.02802 | C | -4.52398 | 1.16517  | 0.48253  |         |
| C                                                        | 5.48019  | 0.13341  | -0.02214 | C | -3.04141 | 3.03875  | 0.70657  |         |
| H                                                        | 5.58929  | 2.27714  | -0.03948 | C | -1.95706 | 2.19813  | 0.41361  |         |
| H                                                        | 6.55683  | -0.00841 | -0.02918 | H | -0.94623 | 2.57873  | 0.39766  |         |
| C                                                        | 2.95702  | 2.8943   | -0.02267 | C | -4.83941 | -1.59427 | 0.02654  |         |
| C                                                        | -3.9866  | -0.27554 | -0.01305 | N | -2.3831  | -1.83627 | -0.21503 |         |
| C                                                        | -3.47356 | 1.20614  | -0.00012 | N | -2.08643 | 0.8799   | 0.14301  |         |
| Ir                                                       | 0.22059  | -1.054   | 0.01377  | C | -3.57286 | -1.04362 | 0.00713  |         |
| C                                                        | -4.41508 | -0.74884 | -1.40873 | C | -3.38682 | 0.34441  | 0.21331  |         |
| H                                                        | -4.57027 | -1.83306 | -1.38553 | C | -5.96937 | -0.78149 | 0.26154  |         |
| H                                                        | -5.34919 | -0.27588 | -1.73149 | C | -5.81212 | 0.56773  | 0.49288  |         |
| H                                                        | -3.63842 | -0.533   | -2.14961 | H | -6.95929 | -1.22812 | 0.26736  |         |
| C                                                        | -5.08349 | -0.58742 | 1.00215  | H | -6.67344 | 1.20111  | 0.68769  |         |
| H                                                        | -5.97638 | 0.01991  | 0.81203  | C | -4.32736 | 2.54766  | 0.72868  |         |
| H                                                        | -5.37045 | -1.64268 | 0.92775  | C | 2.72455  | 2.12521  | -1.39458 |         |
| H                                                        | -4.74844 | -0.40309 | 2.02617  | C | 2.08479  | 3.01444  | -0.2755  |         |
| C                                                        | -4.14341 | 2.13108  | -1.01294 | C | 3.90689  | 1.28759  | -0.88888 |         |
| H                                                        | -5.21975 | 2.20746  | -0.81846 | H | 3.6381   | 0.74026  | 0.01953  |         |
| H                                                        | -3.71469 | 3.13702  | -0.93846 | H | 4.17552  | 0.55554  | -1.65773 |         |
| H                                                        | -3.99862 | 1.7791   | -2.03754 | H | 4.78764  | 1.90636  | -0.68302 |         |
| C                                                        | -3.5128  | 1.84186  | 1.39614  | C | 3.12071  | 2.87343  | -2.66448 |         |
| H                                                        | -2.96457 | 2.79022  | 1.37281  | H | 3.86546  | 3.64766  | -2.44463 |         |
| H                                                        | -4.53819 | 2.04725  | 1.72285  | H | 3.56206  | 2.17589  | -3.38559 |         |
| H                                                        | -3.03338 | 1.19225  | 2.13558  | H | 2.25729  | 3.34533  | -3.14076 |         |
| H                                                        | 3.59441  | 3.77347  | -0.03336 | C | 1.25204  | 4.17616  | -0.83577 |         |
| H                                                        | 1.08678  | 3.95683  | -0.01548 | H | 0.68067  | 4.63298  | -0.01989 |         |
| H                                                        | 5.04542  | -1.99627 | 0.00059  | H | 1.88291  | 4.95141  | -1.28479 |         |
| H                                                        | 2.51571  | -2.53522 | 0.84077  | H | 0.54186  | 3.82344  | -1.59089 |         |
| H                                                        |          | 2.50572  | -2.55029 | - | C        | 3.06302  | 3.53669  | 0.77314 |
| 0.79429Thermal correction to Energy= 0.367027            |          |          |          | H | 3.81833  | 4.18432  | 0.3119   |         |
| Thermal correction to Enthalpy= 0.368177                 |          |          |          | H | 2.52417  | 4.12734  | 1.52295  |         |
| Thermal correction to Gibbs Free Energy= 0.273881        |          |          |          | H | 3.57279  | 2.72239  | 1.29234  |         |
| Sum of electronic and zero-point Energies= -972.679637   |          |          |          | C | 0.54783  | -3.31751 | -0.81244 |         |
| Sum of electronic and thermal Energies=-972.650864       |          |          |          | C | 1.64022  | -2.58807 | -0.30849 |         |
| Sum of electronic and thermal Enthalpies=-972.649714     |          |          |          | C | 0.50753  | -3.70279 | -2.15612 |         |
| Sum of electronic and thermal Free Energies= -972.744010 |          |          |          | C | 2.69701  | -2.25845 | -1.17697 |         |
| SCF Done: E(RM11L) = -973.143151045                      |          |          |          | C | 1.56055  | -3.36564 | -3.00808 |         |
| <b>2a</b>                                                |          |          |          | H | -0.33985 | -4.27062 | -2.53145 |         |
| <b>Number of Negative Frequencies = 0</b>                |          |          |          | C | 2.6569   | -2.64618 | -2.51226 |         |
| Ir                                                       | -0.64772 | -0.32544 | -0.38174 | H | 3.53482  | -1.69196 | -0.78665 |         |
| B                                                        | 0.80916  | 1.0778   | -0.57534 | H | 1.53303  | -3.66364 | -4.05278 |         |
| O                                                        | 1.64722  | 1.2093   | -1.70302 | H | 3.478    | -2.38456 | -3.17454 |         |
| O                                                        | 1.16483  | 2.08917  | 0.3525   | C | 1.63388  | -2.1726  | 1.1116   |         |
|                                                          |          |          |          | H | 0.72269  | -2.44416 | 1.65689  |         |

|                                                          |          |          |          |   |          |          |          |
|----------------------------------------------------------|----------|----------|----------|---|----------|----------|----------|
| N                                                        | 2.60863  | -1.54655 | 1.64521  | C | -5.29086 | 1.18032  | -0.07769 |
| C                                                        | 2.54635  | -1.0891  | 3.04589  | C | -5.38917 | -0.16652 | -0.275   |
| C                                                        | 2.94452  | 0.39953  | 3.01523  | H | -6.19403 | 1.77983  | -0.05403 |
| H                                                        | 2.23503  | 0.97481  | 2.41153  | H | -6.36948 | -0.61077 | -0.40449 |
| H                                                        | 2.96235  | 0.81367  | 4.03087  | C | -4.30727 | -2.41709 | -0.56011 |
| H                                                        | 3.94201  | 0.51944  | 2.57762  | C | 2.9861   | -3.11315 | 0.70685  |
| C                                                        | 3.60527  | -1.89572 | 3.82108  | C | 1.89021  | -3.89013 | -0.10424 |
| H                                                        | 3.68638  | -1.53195 | 4.85238  | C | 4.246    | -2.81857 | -0.11659 |
| H                                                        | 3.33914  | -2.95939 | 3.85118  | H | 3.99634  | -2.4027  | -1.09694 |
| H                                                        | 4.58735  | -1.8034  | 3.34345  | H | 4.86044  | -2.08712 | 0.41903  |
| C                                                        | 1.17457  | -1.2299  | 3.7286   | H | 4.84442  | -3.72338 | -0.27079 |
| H                                                        | 0.3991   | -0.69147 | 3.16918  | C | 3.38576  | -3.75342 | 2.03524  |
| H                                                        | 0.86624  | -2.27761 | 3.82967  | H | 3.80915  | -4.75273 | 1.87974  |
| H                                                        | 1.22167  | -0.80535 | 4.73761  | H | 4.1471   | -3.13642 | 2.52578  |
| H                                                        | -0.25705 | -3.60217 | -0.14035 | H | 2.5336   | -3.8355  | 2.71465  |
| H                                                        | -4.95633 | -2.66218 | -0.13803 | C | 0.9316   | -4.68301 | 0.79636  |
| H                                                        | -2.49158 | -2.42014 | -1.04524 | H | 0.10776  | -5.07898 | 0.19267  |
| H                                                        | -2.23537 | -2.47088 | 0.57212  | H | 1.43348  | -5.52934 | 1.27747  |
| H                                                        | -5.18105 | 3.18604  | 0.93544  | H | 0.50413  | -4.04318 | 1.57551  |
| H                                                        | -2.83304 | 4.08604  | 0.9027   | C | 2.41805  | -4.79394 | -1.21527 |
| Thermal correction to Energy= 0.623526                   |          |          |          | H | 3.04948  | -5.59017 | -0.80361 |
| Thermal correction to Enthalpy= 0.624676                 |          |          |          | H | 1.57801  | -5.26572 | -1.73764 |
| Thermal correction to Gibbs Free Energy=0.488120         |          |          |          | H | 2.99887  | -4.23479 | -1.95295 |
| Sum of electronic and zero-point Energies=-1455.442485   |          |          |          | C | 1.61185  | 1.1446   | 0.91839  |
| Sum of electronic and thermal Energies=-1455.394594      |          |          |          | C | 2.97507  | 1.19687  | 0.53317  |
| Sum of electronic and thermal Enthalpies=-1455.393444    |          |          |          | C | 1.25343  | 1.76212  | 2.13911  |
| Sum of electronic and thermal Free Energies=-1455.530000 |          |          |          | C | 3.94224  | 1.69558  | 1.41191  |
| SCF Done: E(RM11L) = -1456.13739528                      |          |          |          | C | 2.22415  | 2.25966  | 3.00962  |
|                                                          |          |          |          | H | 0.20821  | 1.81272  | 2.42793  |
|                                                          |          |          |          | C | 3.57598  | 2.21072  | 2.65723  |
| <b>TS3a</b>                                              |          |          |          | H | 4.98742  | 1.68656  | 1.11461  |
| <b>Number of Negative Frequencies = 1</b>                |          |          |          | H | 1.92315  | 2.68328  | 3.9649   |
| Ir                                                       | -0.03311 | -0.04061 | 0.13176  | H | 4.33586  | 2.59296  | 3.33375  |
| B                                                        | 1.2587   | -1.64948 | 0.09934  | H | 0.97154  | 1.24659  | -0.1986  |
| O                                                        | 2.32854  | -1.85463 | 0.9874   | C | 3.38108  | 0.70859  | -0.82223 |
| O                                                        | 1.1282   | -2.8094  | -0.69972 | H | 3.44349  | -0.378   | -0.89765 |
| C                                                        | -4.22957 | -1.01361 | -0.32788 | N | 3.67022  | 1.34643  | -1.88789 |
| C                                                        | -3.11115 | -3.13273 | -0.61847 | C | 3.63127  | 2.81773  | -2.06345 |
| C                                                        | -1.89486 | -2.44807 | -0.43887 | C | 2.47044  | 3.54654  | -1.35581 |
| H                                                        | -0.95276 | -2.97472 | -0.51289 | H | 2.59314  | 3.57829  | -0.27136 |
| C                                                        | -4.01767 | 1.82032  | 0.09297  | H | 2.41695  | 4.58065  | -1.71736 |
| N                                                        | -1.60794 | 1.51319  | 0.213    | H | 1.51466  | 3.06021  | -1.58327 |
| N                                                        | -1.79356 | -1.13406 | -0.20777 | C | 3.48074  | 3.02732  | -3.58331 |
| C                                                        | -2.86265 | 1.00439  | 0.0635   | H | 3.50264  | 4.09417  | -3.83627 |
| C                                                        | -2.96291 | -0.41104 | -0.15092 |   |          |          |          |

|                                                          |          |          |          |   |          |          |          |
|----------------------------------------------------------|----------|----------|----------|---|----------|----------|----------|
| H                                                        | 4.29045  | 2.52451  | -4.1241  | H | -5.64205 | 1.1509   | 0.29972  |
| H                                                        | 2.52958  | 2.6105   | -3.93672 | H | -4.68817 | 0.98567  | 1.78612  |
| C                                                        | 4.9842   | 3.39273  | -1.60448 | H | -4.04472 | 1.91976  | 0.42995  |
| H                                                        | 5.09167  | 3.32228  | -0.51786 | C | -4.70343 | -1.4723  | 0.72874  |
| H                                                        | 5.8146   | 2.84866  | -2.06949 | H | -4.25263 | -2.39888 | 0.35849  |
| H                                                        | 5.06483  | 4.44886  | -1.88868 | H | -4.60994 | -1.46485 | 1.81989  |
| H                                                        | -3.94471 | 2.87801  | 0.23747  | H | -5.76894 | -1.47373 | 0.47412  |
| H                                                        | -1.61878 | 2.49217  | 0.0093   | C | -4.91596 | -1.03903 | -2.14417 |
| H                                                        | -1.30091 | 1.37193  | 1.15415  | H | -5.88502 | -0.55201 | -1.98334 |
| H                                                        | -5.25975 | -2.8864  | -0.6921  | H | -4.70919 | -1.03303 | -3.22043 |
| H                                                        | -3.07276 | -4.18612 | -0.80232 | H | -4.99174 | -2.0806  | -1.82187 |
| Thermal correction to Energy= 0.619602                   |          |          |          | C | -3.58141 | 1.07935  | -2.031   |
| Thermal correction to Enthalpy=0.620752                  |          |          |          | H | -4.49112 | 1.68942  | -2.019   |
| Thermal correction to Gibbs Free Energy=0.487396         |          |          |          | H | -2.79099 | 1.62476  | -1.50807 |
| Sum of electronic and zero-point Energies=-1455.417355   |          |          |          | H | -3.27196 | 0.94806  | -3.07376 |
| Sum of electronic and thermal Energies=-1455.370574      |          |          |          | C | 0.49066  | 0.42701  | 2.07586  |
| Sum of electronic and thermal Enthalpies=-1455.369424    |          |          |          | C | 0.41722  | -0.93709 | 1.66305  |
| Sum of electronic and thermal Free Energies=-1455.502779 |          |          |          | C | 0.79614  | -1.90293 | 2.63592  |
| SCF Done: E(RM11L) = -1456.10596565                      |          |          |          | C | 1.26049  | -1.56273 | 3.90518  |
|                                                          |          |          |          | C | 1.35689  | -0.21806 | 4.27834  |
|                                                          |          |          |          | C | 0.96356  | 0.75155  | 3.36637  |
|                                                          |          |          |          | H | 0.72775  | -2.95731 | 2.38225  |
|                                                          |          |          |          | H | 1.53724  | -2.34999 | 4.60404  |
|                                                          |          |          |          | H | 1.00059  | 1.80342  | 3.63513  |
|                                                          |          |          |          | H | 1.70995  | 0.06417  | 5.26704  |
|                                                          |          |          |          | C | 0.04031  | 1.55942  | 1.23154  |
|                                                          |          |          |          | N | 0.43484  | 2.75324  | 1.46598  |
|                                                          |          |          |          | C | -0.09573 | 3.92207  | 0.75     |
|                                                          |          |          |          | C | -0.64995 | 4.8593   | 1.84243  |
|                                                          |          |          |          | H | -1.50098 | 4.39367  | 2.35411  |
|                                                          |          |          |          | H | 0.11988  | 5.07479  | 2.59191  |
|                                                          |          |          |          | H | -0.98712 | 5.80802  | 1.40711  |
|                                                          |          |          |          | C | 1.10463  | 4.59591  | 0.05789  |
|                                                          |          |          |          | H | 1.51985  | 3.94279  | -0.71762 |
|                                                          |          |          |          | H | 0.80375  | 5.54104  | -0.41018 |
|                                                          |          |          |          | H | 1.89747  | 4.80516  | 0.78501  |
|                                                          |          |          |          | C | -1.20365 | 3.6406   | -0.27843 |
|                                                          |          |          |          | H | -1.556   | 4.58237  | -0.71456 |
|                                                          |          |          |          | H | -0.84646 | 3.01087  | -1.09818 |
|                                                          |          |          |          | H | -2.06235 | 3.14607  | 0.18846  |
|                                                          |          |          |          | H | -0.67922 | 1.30671  | 0.45124  |
|                                                          |          |          |          | H | 3.37042  | 2.65623  | -3.00428 |
|                                                          |          |          |          | H | 0.87004  | 2.65337  | -3.20685 |
|                                                          |          |          |          | H | 5.02783  | -2.19187 | 0.00488  |

#### 4a

#### Number of Negative Frequencies = 0

|    |          |          |          |   |          |          |          |
|----|----------|----------|----------|---|----------|----------|----------|
| Ir | 0.06967  | -1.62392 | -0.18977 | H | 1.53724  | -2.34999 | 4.60404  |
| B  | -1.82894 | -0.93326 | -0.34887 | H | 1.00059  | 1.80342  | 3.63513  |
| C  | 3.40511  | 0.84365  | -1.81427 | H | 1.70995  | 0.06417  | 5.26704  |
| C  | 1.3949   | 1.88611  | -2.64818 | C | 0.04031  | 1.55942  | 1.23154  |
| C  | 0.65128  | 0.89105  | -1.98124 | N | 0.43484  | 2.75324  | 1.46598  |
| H  | -0.432   | 0.8953   | -2.01233 | C | -0.09573 | 3.92207  | 0.75     |
| C  | 4.56881  | -1.33519 | -0.48133 | C | -0.64995 | 4.8593   | 1.84243  |
| N  | 2.33122  | -2.34391 | -0.1167  | H | -1.50098 | 4.39367  | 2.35411  |
| N  | 1.20763  | -0.0835  | -1.2688  | H | 0.11988  | 5.07479  | 2.59191  |
| O  | -2.56812 | -1.03999 | -1.54354 | H | -0.98712 | 5.80802  | 1.40711  |
| O  | -2.6108  | -0.30653 | 0.62578  | C | 1.10463  | 4.59591  | 0.05789  |
| C  | 3.1942   | -1.28079 | -0.59002 | H | 1.51985  | 3.94279  | -0.71762 |
| C  | 2.5822   | -0.16359 | -1.22291 | H | 0.80375  | 5.54104  | -0.41018 |
| C  | 5.38238  | -0.30512 | -1.00889 | H | 1.89747  | 4.80516  | 0.78501  |
| C  | 4.81456  | 0.75627  | -1.67797 | C | -1.20365 | 3.6406   | -0.27843 |
| H  | 6.46085  | -0.37187 | -0.90157 | H | -1.556   | 4.58237  | -0.71456 |
| H  | 5.43205  | 1.53547  | -2.11603 | H | -0.84646 | 3.01087  | -1.09818 |
| C  | 2.76629  | 1.88296  | -2.53795 | H | -2.06235 | 3.14607  | 0.18846  |
| C  | -3.98097 | -0.2438  | 0.16002  | H | -0.67922 | 1.30671  | 0.45124  |
| C  | -3.80795 | -0.29939 | -1.3997  | H | 3.37042  | 2.65623  | -3.00428 |
| H  | -0.66516 | -2.90199 | 0.47763  | H | 0.87004  | 2.65337  | -3.20685 |
| C  | -4.62577 | 1.03227  | 0.69316  | H | 5.02783  | -2.19187 | 0.00488  |

H 2.55215 -2.57413 0.8535  
H 2.49292 -3.19291 -0.66153  
Thermal correction to Energy=0.620307  
Thermal correction to Enthalpy= 0.621457  
Thermal correction to Gibbs Free Energy=0.50931  
Sum of electronic and zero-point Energies=-1455.479463  
Sum of electronic and thermal Energies=-1455.431765  
Sum of electronic and thermal Enthalpies=-1455.430615  
Sum of electronic and thermal Free Energies=-1455.565424  
SCF Done: E(RM11L) = -1456.16218799

### TS5a

#### Number of Negative Frequencies = 1

Ir 0.24336 0.26635 0.55529  
B 1.03778 -1.38066 -0.61011  
C -4.12675 -0.21922 0.66629  
C -3.39487 -2.44767 1.23161  
C -2.0732 -1.97583 1.10217  
H -1.25156 -2.66834 1.22105  
C -3.38383 2.43367 -0.16128  
N -1.05577 1.72264 0.01949  
N -1.73961 -0.72368 0.79618  
O 0.20119 -2.52808 -0.72736  
O 1.63164 -1.11684 -1.87055  
C -2.39992 1.46538 0.14063  
C -2.76455 0.14672 0.55575  
C -4.75937 2.04609 -0.00885  
C -5.11182 0.78692 0.38343  
H -5.53722 2.77101 -0.22053  
H -6.16319 0.53687 0.47329  
C -4.45079 -1.55593 1.03229  
C 0.8788 -1.83937 -2.8637  
C 0.36053 -3.07715 -2.04684  
H 1.50008 1.22511 0.28705  
C 1.80504 -2.17854 -4.02892  
H 1.29258 -2.8078 -4.76614  
H 2.12168 -1.25765 -4.53144  
H 2.70375 -2.69955 -3.68822  
C -0.2582 -0.92443 -3.34233  
H -0.92486 -0.6703 -2.51258  
H 0.17447 0.00834 -3.72012  
H -0.84326 -1.38513 -4.14596  
C -0.98141 -3.63985 -2.50978  
H -0.92491 -3.99048 -3.54705

H -1.26402 -4.49147 -1.8798  
H -1.77418 -2.89097 -2.43504  
C 1.40229 -4.20075 -1.95102  
H 1.53358 -4.72501 -2.90424  
H 2.3717 -3.80381 -1.63236  
H 1.07086 -4.92841 -1.20192  
C 1.47655 -1.89745 1.95267  
C 1.95294 -1.28029 0.77439  
C 3.31397 -0.82497 0.78884  
C 4.12279 -1.07554 1.89437  
C 3.60148 -1.66017 3.0588  
C 2.27014 -2.0503 3.10039  
H 5.17241 -0.79799 1.85876  
H 1.85451 -2.51047 3.99311  
H 4.24812 -1.8138 3.91922  
C 3.94122 -0.21518 -0.42384  
H 3.91255 -0.88712 -1.28619  
N 4.51427 0.90213 -0.63845  
C 4.63584 2.08825 0.22881  
C 6.14675 2.38388 0.30782  
H 6.58154 2.46744 -0.69457  
H 6.32643 3.32277 0.84513  
H 6.67068 1.58039 0.84031  
C 4.05033 2.06575 1.65496  
H 3.00468 1.74783 1.65678  
H 4.61485 1.41311 2.32491  
H 4.09687 3.08066 2.07006  
C 3.93535 3.21199 -0.56813  
H 4.33127 3.26865 -1.58789  
H 2.85829 3.01736 -0.62954  
H 4.08653 4.18216 -0.07977  
H 0.48377 -2.32801 1.95726  
H -5.47451 -1.85203 1.12836  
H -3.54343 -3.4789 1.4753  
H -3.11556 3.41591 -0.49013  
H -0.85072 2.53017 0.57252  
H -0.87613 1.95208 -0.93711

Thermal correction to Energy= 0.619050  
Thermal correction to Enthalpy=0.620200  
Thermal correction to Gibbs Free Energy= 0.488082  
Sum of electronic and zero-point Energies=-1455.428902  
Sum of electronic and thermal Energies=-1455.382164  
Sum of electronic and thermal Enthalpies=-1455.381014  
Sum of electronic and thermal Free Energies=-1455.513132

SCF Done: E(RM11L)= -1456.11612317

## 6a

### Number of Negative Frequencies = 0

|    |          |          |          |
|----|----------|----------|----------|
| Ir | -0.17491 | -1.15634 | -0.27306 |
| B  | 0.579    | 1.44174  | -0.56093 |
| C  | -4.51857 | -0.56589 | 0.27261  |
| C  | -4.06381 | 0.71235  | -1.71348 |
| C  | -2.70764 | 0.33444  | -1.6027  |
| H  | -1.98749 | 0.71544  | -2.31174 |
| C  | -3.5204  | -2.24049 | 2.29968  |
| N  | -1.25012 | -2.10205 | 1.30874  |
| N  | -2.23164 | -0.44608 | -0.63761 |
| O  | -0.44573 | 2.16956  | -1.15176 |
| O  | 0.98133  | 2.00185  | 0.64335  |
| C  | -2.66476 | -1.76161 | 1.33161  |
| C  | -3.13462 | -0.91265 | 0.30132  |
| C  | -4.88977 | -1.88935 | 2.27585  |
| C  | -5.37951 | -1.07007 | 1.28152  |
| H  | -5.55165 | -2.27411 | 3.04574  |
| H  | -6.43148 | -0.79962 | 1.25202  |
| C  | -4.9704  | 0.27382  | -0.77872 |
| C  | -0.04817 | 2.94465  | 1.04015  |
| C  | -0.66792 | 3.35761  | -0.34464 |
| H  | 1.17688  | -1.89487 | 0.18557  |
| C  | 0.60529  | 4.08126  | 1.8188   |
| H  | -0.12797 | 4.86071  | 2.05535  |
| H  | 1.01055  | 3.69796  | 2.76174  |
| H  | 1.42798  | 4.53226  | 1.25857  |
| C  | -1.03426 | 2.1859   | 1.93815  |
| H  | -1.51673 | 1.37119  | 1.38988  |
| H  | -0.48169 | 1.74605  | 2.77537  |
| H  | -1.80529 | 2.84954  | 2.34443  |
| C  | -2.16167 | 3.66458  | -0.31189 |
| H  | -2.36427 | 4.51372  | 0.35072  |
| H  | -2.50906 | 3.92889  | -1.31694 |
| H  | -2.74466 | 2.80697  | 0.03017  |
| C  | 0.09445  | 4.49983  | -1.02472 |
| H  | -0.0673  | 5.45522  | -0.51445 |
| H  | 1.16955  | 4.29413  | -1.05015 |
| H  | -0.25684 | 4.59753  | -2.05736 |
| C  | 0.55389  | -0.53633 | -2.2348  |
| C  | 1.27384  | 0.22906  | -1.23616 |
| C  | 2.69997  | -0.05689 | -1.06176 |

|   |          |          |          |
|---|----------|----------|----------|
| C | 3.30274  | -1.04359 | -1.8074  |
| C | 2.56283  | -1.84306 | -2.72571 |
| C | 1.23541  | -1.5843  | -2.95126 |
| H | 4.37377  | -1.19864 | -1.72437 |
| H | 0.68776  | -2.13531 | -3.71309 |
| H | 3.075    | -2.6253  | -3.28066 |
| C | 3.52488  | 0.88538  | -0.25616 |
| H | 3.30179  | 1.93073  | -0.50513 |
| N | 4.44542  | 0.75064  | 0.61869  |
| C | 4.91297  | -0.48236 | 1.28041  |
| C | 6.22289  | -0.91664 | 0.59478  |
| H | 6.93403  | -0.08349 | 0.55393  |
| H | 6.68846  | -1.73866 | 1.15188  |
| H | 6.04164  | -1.2604  | -0.42896 |
| C | 3.92192  | -1.65902 | 1.35458  |
| H | 2.94105  | -1.31619 | 1.69951  |
| H | 3.77837  | -2.15816 | 0.39527  |
| H | 4.29581  | -2.40412 | 2.06779  |
| C | 5.2336   | -0.03771 | 2.72536  |
| H | 5.93695  | 0.80229  | 2.72258  |
| H | 4.32004  | 0.28739  | 3.2384   |
| H | 5.67478  | -0.86144 | 3.29956  |
| H | -0.29743 | -0.09126 | -2.74571 |
| H | -6.0188  | 0.55428  | -0.82767 |
| H | -4.36109 | 1.35723  | -2.534   |
| H | -3.13637 | -2.89209 | 3.07997  |
| H | -1.13216 | -3.11666 | 1.24243  |
| H | -0.80099 | -1.82463 | 2.18539  |

Thermal correction to Energy=0.620800

Thermal correction to Enthalpy=0.621950

Thermal correction to Gibbs Free Energy=0.487730

Sum of electronic and zero-point Energies= -1455.444831

Sum of electronic and thermal Energies=-1455.397446

Sum of electronic and thermal Enthalpies=-1455.396296

Sum of electronic and thermal Free Energies=-1455.530515

SCF Done: E(RM11L)= -1456.13739036

## 7

### Number of Negative Frequencies = 0

|   |         |          |          |
|---|---------|----------|----------|
| C | 2.60547 | -1.92103 | -1.79857 |
| H | 1.95144 | -2.2444  | -2.59691 |
| C | 4.00066 | -2.05898 | -1.9035  |
| C | 4.2345  | -1.07325 | 0.2769   |
| C | 2.81476 | -0.96017 | 0.32894  |

|    |          |          |          |
|----|----------|----------|----------|
| C  | 2.19939  | -0.39818 | 1.47143  |
| C  | 2.96287  | 0.04033  | 2.53518  |
| N  | 1.99054  | -1.3881  | -0.72301 |
| N  | 0.75306  | -0.30024 | 1.44329  |
| C  | 4.99255  | -0.61492 | 1.38662  |
| C  | 4.37089  | -0.07095 | 2.49132  |
| H  | 6.07498  | -0.70266 | 1.34729  |
| H  | 4.96043  | 0.27654  | 3.33476  |
| C  | 4.82546  | -1.64202 | -0.88186 |
| C  | -4.35016 | -0.66783 | 0.34751  |
| Ir | 0.06092  | -1.14345 | -0.47639 |
| H  | -0.35426 | -1.7725  | -1.92772 |
| C  | -5.00251 | -0.73815 | -1.03551 |
| H  | -5.51911 | -1.69153 | -1.18313 |
| H  | -5.73622 | 0.06953  | -1.12184 |
| H  | -4.26101 | -0.61296 | -1.83122 |
| C  | -5.39099 | -0.84004 | 1.44615  |
| H  | -6.22785 | -0.15627 | 1.26976  |
| H  | -5.77976 | -1.86411 | 1.44333  |
| H  | -4.97657 | -0.62518 | 2.43414  |
| O  | -2.03663 | -0.69825 | -0.0363  |
| B  | -2.46216 | 0.6212   | 0.11278  |
| C  | 0.03232  | 3.3993   | -1.12726 |
| C  | 0.24503  | 3.46679  | 0.43198  |
| B  | -1.35793 | 1.89668  | -0.10072 |
| O  | -0.48283 | 2.28167  | 0.89929  |
| O  | -1.21189 | 2.63262  | -1.24505 |
| C  | 1.69431  | 3.34319  | 0.88885  |
| H  | 2.29085  | 4.17659  | 0.50245  |
| H  | 1.74058  | 3.37176  | 1.98306  |
| H  | 2.14481  | 2.40666  | 0.55305  |
| C  | 1.10772  | 2.58857  | -1.85706 |
| H  | 0.80855  | 2.46323  | -2.90293 |
| H  | 2.07686  | 3.09754  | -1.83358 |
| H  | 1.2106   | 1.5884   | -1.42079 |
| C  | -0.16997 | 4.75081  | -1.80324 |
| H  | -0.32712 | 4.6051   | -2.87713 |
| H  | -1.03802 | 5.27936  | -1.40192 |
| H  | 0.71655  | 5.38077  | -1.67098 |
| C  | -0.42945 | 4.67001  | 1.09524  |
| H  | -0.39666 | 4.54239  | 2.18239  |
| H  | 0.08241  | 5.60397  | 0.84225  |
| H  | -1.47873 | 4.75188  | 0.7939   |
| O  | -3.776   | 0.68099  | 0.46249  |

|   |          |          |          |
|---|----------|----------|----------|
| C | -3.09501 | -1.59562 | 0.49253  |
| C | -2.70447 | -1.89332 | 1.94027  |
| H | -1.71294 | -2.35769 | 1.94348  |
| H | -2.66158 | -0.97673 | 2.53762  |
| H | -3.41547 | -2.58326 | 2.40479  |
| C | -3.1289  | -2.86951 | -0.33564 |
| H | -3.22816 | -2.6574  | -1.4017  |
| H | -2.19881 | -3.42743 | -0.1876  |
| H | -3.97058 | -3.49487 | -0.01734 |
| H | 4.40539  | -2.50043 | -2.80885 |
| H | 5.90519  | -1.73958 | -0.94422 |
| H | 2.47171  | 0.47293  | 3.40276  |
| H | 0.35354  | -0.7567  | 2.26631  |
| H | 0.46492  | 0.68538  | 1.48155  |

Thermal correction to Energy= 0.561167

Thermal correction to Enthalpy= 0.562111

Thermal correction to Gibbs Free Energy= 0.470423

Sum of electronic and zero-point Energies= -1384.405361

Sum of electronic and thermal Energies= -1384.374970

Sum of electronic and thermal Enthalpies= -1384.374025

Sum of electronic and thermal Free Energies= -1384.465713

E(RM11L)= -1385.05611278

## TS8

### Number of Negative Frequencies = 1

|    |          |          |          |
|----|----------|----------|----------|
| Ir | 0.08355  | -0.41387 | -1.31294 |
| B  | 1.27404  | -1.13049 | 0.93896  |
| B  | 2.70471  | -0.53355 | 0.18922  |
| C  | -3.94629 | 0.44317  | -0.43181 |
| C  | -2.54759 | 0.45524  | -0.60721 |
| C  | -1.75743 | 1.5523   | -0.16292 |
| C  | -2.34741 | 2.67212  | 0.45981  |
| C  | -0.12385 | 3.58379  | 0.70962  |
| C  | 0.36528  | 2.4168   | 0.0871   |
| H  | 1.43198  | 2.26199  | -0.031   |
| N  | -1.85703 | -0.60055 | -1.17044 |
| N  | -0.41107 | 1.42652  | -0.35255 |
| O  | 1.0702   | -2.50894 | 1.12837  |
| O  | 0.69365  | -0.40545 | 1.99177  |
| C  | -4.53279 | 1.60075  | 0.18994  |
| C  | -3.77629 | 2.65789  | 0.61259  |
| H  | -5.60728 | 1.63002  | 0.33315  |
| H  | -4.26626 | 3.50423  | 1.0814   |
| C  | -1.5017  | 3.72804  | 0.9032   |



|   |          |          |          |
|---|----------|----------|----------|
| C | 0.50649  | -2.70389 | 2.44578  |
| C | -0.14061 | -1.30575 | 2.75726  |
| H | 0.31781  | -1.83584 | -2.12458 |
| C | 4.47353  | 0.87267  | -0.25994 |
| O | 3.57543  | -1.27739 | -0.58617 |
| O | 3.13973  | 0.77592  | 0.32021  |
| C | 4.48431  | -0.3463  | -1.24482 |
| C | 1.67909  | -3.03909 | 3.37893  |
| H | 1.34316  | -3.26121 | 4.39786  |
| H | 2.20293  | -3.9184  | 2.98922  |
| C | -0.47483 | -3.87252 | 2.39988  |
| H | 0.06407  | -4.79887 | 2.17107  |
| H | -0.97455 | -4.00142 | 3.36734  |
| H | -1.2366  | -3.72886 | 1.62926  |
| C | -1.57792 | -1.18668 | 2.23874  |
| H | -2.2726  | -1.78174 | 2.8419   |
| H | -1.89067 | -0.13886 | 2.28674  |
| H | -1.64485 | -1.51299 | 1.19972  |
| C | -0.0856  | -0.88165 | 4.22342  |
| H | -0.56679 | 0.09606  | 4.34267  |
| H | -0.61739 | -1.59992 | 4.85831  |
| H | 0.94361  | -0.7938  | 4.58121  |
| C | 5.83959  | -1.01905 | -1.42508 |
| H | 5.74739  | -1.85867 | -2.12239 |
| H | 6.56787  | -0.312   | -1.83842 |
| H | 6.22567  | -1.4054  | -0.47874 |
| C | 3.86234  | -0.02171 | -2.6092  |
| H | 4.50692  | 0.63457  | -3.20352 |
| H | 3.71173  | -0.95348 | -3.16338 |
| H | 2.88425  | 0.46183  | -2.49363 |
| C | 4.61932  | 2.24005  | -0.91882 |
| H | 4.58837  | 3.02468  | -0.15458 |
| H | 5.5786   | 2.31571  | -1.4434  |
| H | 3.81618  | 2.43235  | -1.63468 |
| C | 5.4684   | 0.7263   | 0.89617  |
| H | 6.50184  | 0.85004  | 0.5559   |
| H | 5.25816  | 1.49481  | 1.64742  |
| H | 5.37138  | -0.25301 | 1.37603  |
| H | 2.39365  | -2.21016 | 3.41793  |
| H | -1.92791 | 4.58891  | 1.37452  |
| H | 0.58415  | 4.32324  | 1.02084  |
| H | -4.45593 | -0.33521 | -0.71901 |
| H | -2.47419 | -0.58455 | -1.95711 |
| H | -2.46473 | -1.24535 | -0.70681 |

Thermal correction to Energy=0.573134

Thermal correction to Enthalpy=0.574284

Thermal correction to Gibbs Free Energy= 0.450609

Sum of electronic and zero-point Energies=-1384.383945

Sum of electronic and thermal Energies= -1384.340651

Sum of electronic and thermal Enthalpies= -1384.339501

Sum of electronic and thermal Free Energies=-1384.463175

SCF Done: E(RM11L) = -1385.03185484

**9**

**Number of Negative Frequencies = 0**

|    |          |          |          |
|----|----------|----------|----------|
| Ir | 0.19283  | -0.31284 | -1.14007 |
| B  | -1.66473 | -0.80172 | -0.51004 |
| H  | -0.54252 | 0.27116  | -2.46218 |
| C  | 4.68105  | -0.68785 | -0.95784 |
| C  | 3.32088  | -0.57863 | -0.74796 |
| C  | 2.71837  | -1.25559 | 0.35179  |
| C  | 3.54996  | -1.9694  | 1.26836  |
| C  | 1.56717  | -2.48939 | 2.53817  |
| C  | 0.80707  | -1.80754 | 1.5646   |
| N  | 2.46617  | 0.20775  | -1.59453 |
| N  | 1.34605  | -1.21757 | 0.50016  |
| O  | 1.05784  | 2.14236  | 0.23574  |
| O  | -1.19833 | 2.25353  | -0.17703 |
| C  | 5.49547  | -1.4369  | -0.07701 |
| C  | 4.9467   | -2.04917 | 1.02737  |
| H  | 6.56223  | -1.50482 | -0.26909 |
| H  | 5.56716  | -2.60549 | 1.72447  |
| C  | 2.93007  | -2.58638 | 2.38494  |
| C  | -0.88563 | 3.37809  | 0.68144  |
| C  | 0.66713  | 3.51657  | 0.4959   |
| C  | -3.73011 | -1.86516 | -0.42299 |
| B  | -0.06002 | 1.46001  | -0.29661 |
| H  | -0.27147 | -1.73357 | 1.6467   |
| C  | -3.4987  | -1.05996 | 0.90316  |
| O  | -2.08175 | -0.77438 | 0.83704  |
| O  | -2.71015 | -1.32057 | -1.29329 |
| C  | -4.23297 | 0.28703  | 0.92581  |
| H  | -3.88926 | 0.8642   | 1.79042  |
| H  | -4.01157 | 0.86803  | 0.02585  |
| H  | -5.3178  | 0.15788  | 1.00927  |
| C  | -3.7865  | -1.83281 | 2.188    |
| H  | -3.58145 | -1.19614 | 3.05625  |
| H  | -4.83828 | -2.13873 | 2.23384  |



|                                                          |          |          |          |   |          |          |          |
|----------------------------------------------------------|----------|----------|----------|---|----------|----------|----------|
| H                                                        | -2.37935 | -5.07543 | -1.73869 | C | -4.32736 | 2.54766  | 0.72868  |
| H                                                        | -3.04973 | -5.34592 | -0.12461 | C | 2.72455  | 2.12521  | -1.39458 |
| H                                                        | -3.5563  | -3.9271  | -1.06189 | C | 2.08479  | 3.01444  | -0.2755  |
| C                                                        | -3.32269 | -2.48791 | 1.13508  | C | 3.90689  | 1.28759  | -0.88888 |
| H                                                        | -4.04403 | -3.30639 | 1.30443  | H | 3.6381   | 0.74026  | 0.01953  |
| H                                                        | -3.42704 | -1.7743  | 1.96339  | H | 4.17552  | 0.55554  | -1.65773 |
| H                                                        | -3.58578 | -1.97036 | 0.21417  | H | 4.78764  | 1.90636  | -0.68302 |
| C                                                        | -1.54871 | -3.75529 | 2.38448  | C | 3.12071  | 2.87343  | -2.66448 |
| H                                                        | -1.80909 | -3.12925 | 3.25369  | H | 3.86546  | 3.64766  | -2.44463 |
| H                                                        | -2.12026 | -4.68824 | 2.455    | H | 3.56206  | 2.17589  | -3.38559 |
| H                                                        | -0.48266 | -3.9943  | 2.44624  | H | 2.25729  | 3.34533  | -3.14076 |
| H                                                        | -6.07449 | 2.38533  | -0.31412 | C | 1.25204  | 4.17616  | -0.83577 |
| H                                                        | -4.78211 | 4.52761  | -0.26675 | H | 0.68067  | 4.63298  | -0.01989 |
| H                                                        | 0.92418  | 3.25979  | 0.88131  | H | 1.88291  | 4.95141  | -1.28479 |
| H                                                        | -0.9361  | 0.2327   | 1.25235  | H | 0.54186  | 3.82344  | -1.59089 |
| H                                                        | 0.57289  | 0.95753  | 1.33637  | C | 3.06302  | 3.53669  | 0.77314  |
| Thermal correction to Energy=0.571160                    |          |          |          | H | 3.81833  | 4.18432  | 0.3119   |
| Thermal correction to Enthalpy=0.572310                  |          |          |          | H | 2.52417  | 4.12734  | 1.52295  |
| Thermal correction to Gibbs Free Energy=0.443545         |          |          |          | H | 3.57279  | 2.72239  | 1.29234  |
| Sum of electronic and zero-point Energies=-1384.405130   |          |          |          | C | 0.54783  | -3.31751 | -0.81244 |
| Sum of electronic and thermal Energies= -1384.360905     |          |          |          | C | 1.64022  | -2.58807 | -0.30849 |
| Sum of electronic and thermal Enthalpies=-1384.359755    |          |          |          | C | 0.50753  | -3.70279 | -2.15612 |
| Sum of electronic and thermal Free Energies=-1384.488520 |          |          |          | C | 2.69701  | -2.25845 | -1.17697 |
| SCF Done: E(RM11L) = -1385.04504706                      |          |          |          | C | 1.56055  | -3.36564 | -3.00808 |
|                                                          |          |          |          | H | -0.33985 | -4.27062 | -2.53145 |
| <b>zB</b>                                                |          |          |          | C | 2.6569   | -2.64618 | -2.51226 |
| <b>Number of Negative Frequencies = 0</b>                |          |          |          | H | 1.53303  | -3.66364 | -4.05278 |
| Ir                                                       | -0.64772 | -0.32544 | -0.38174 | H | 3.478    | -2.38456 | -3.17454 |
| B                                                        | 0.80916  | 1.0778   | -0.57534 | H | -0.25705 | -3.60217 | -0.14035 |
| O                                                        | 1.64722  | 1.2093   | -1.70302 | H | -4.95633 | -2.66218 | -0.13803 |
| O                                                        | 1.16483  | 2.08917  | 0.3525   | H | -2.49158 | -2.42014 | -1.04524 |
| C                                                        | -4.52398 | 1.16517  | 0.48253  | H | -2.23537 | -2.47088 | 0.57212  |
| C                                                        | -3.04141 | 3.03875  | 0.70657  | H | -5.18105 | 3.18604  | 0.93544  |
| C                                                        | -1.95706 | 2.19813  | 0.41361  | H | -2.83304 | 4.08604  | 0.9027   |
| H                                                        | -0.94623 | 2.57873  | 0.39766  | C | 3.88719  | -1.4537  | -0.62248 |
| C                                                        | -4.83941 | -1.59427 | 0.02654  | H | 4.60198  | -1.29123 | -1.40195 |
| N                                                        | -2.3831  | -1.83627 | -0.21503 | N | 4.51844  | -2.20415 | 0.47262  |
| N                                                        | -2.08643 | 0.8799   | 0.14301  | H | 1.63563  | -2.28762 | 0.71845  |
| C                                                        | -3.57286 | -1.04362 | 0.00713  | C | 5.95309  | -1.88732 | 0.5205   |
| C                                                        | -3.38682 | 0.34441  | 0.21331  | C | 6.14059  | -0.35906 | 0.55005  |
| C                                                        | -5.96937 | -0.78149 | 0.26154  | H | 7.09598  | -0.12501 | 0.97116  |
| C                                                        | -5.81212 | 0.56773  | 0.49288  | H | 6.08605  | 0.02631  | -0.44665 |
| H                                                        | -6.95929 | -1.22812 | 0.26736  | H | 5.37     | 0.08336  | 1.14617  |
| H                                                        | -6.67344 | 1.20111  | 0.68769  | C | 6.57324  | -2.50518 | 1.78749  |

|   |         |          |          |
|---|---------|----------|----------|
| H | 6.42714 | -3.56509 | 1.77564  |
| H | 7.62103 | -2.28983 | 1.81317  |
| H | 6.10243 | -2.08991 | 2.65397  |
| C | 6.64842 | -2.4658  | -0.72589 |
| H | 7.70731 | -2.47352 | -0.57226 |
| H | 6.30515 | -3.46516 | -0.89425 |
| H | 6.41593 | -1.86065 | -1.57715 |

Thermal correction to Energy=0.623325  
 Thermal correction to Enthalpy=0.624475  
 Thermal correction to Gibbs Free Energy=0.484974  
 Sum of electronic and zero-point Energies=-1455.437298  
 Sum of electronic and thermal Energies=-1455.388998  
 Sum of electronic and thermal Enthalpies= -1455.387848  
 Sum of electronic and thermal Free Energies=-1455.527349  
 SCF Done: E(RM11L) = -1456.1328824

**TS3b**

**Number of Negative Frequencies = 1**

|   |             |             |             |
|---|-------------|-------------|-------------|
| B | -0.48289000 | 1.62276000  | -0.34174000 |
| C | -4.98402000 | -1.15176000 | 1.20458000  |
| C | -5.48115000 | 0.11191000  | 1.61108000  |
| C | -4.74927000 | 1.24092000  | 1.32694000  |
| C | -3.51099000 | 1.12189000  | 0.66746000  |
| C | 0.86719000  | 3.49721000  | -0.05535000 |
| C | -0.62018000 | 3.95220000  | -0.24102000 |
| N | -2.99728000 | -0.04538000 | 0.26807000  |
| O | 0.71526000  | 2.08642000  | 0.22980000  |
| O | -1.24223000 | 2.74388000  | -0.74653000 |
| C | 0.82201000  | -1.15215000 | -1.00696000 |
| C | 0.91605000  | -2.36298000 | -1.75590000 |
| C | 2.07839000  | -3.13916000 | -1.69853000 |
| H | 2.12068000  | -4.07524000 | -2.25304000 |
| C | 3.18275000  | -2.74185000 | -0.95216000 |
| H | 4.06160000  | -3.38105000 | -0.92367000 |
| C | 3.16089000  | -1.49779000 | -0.25084000 |
| C | 1.96456000  | -0.72055000 | -0.31906000 |
| C | -1.30994000 | 4.30152000  | 1.08464000  |
| H | -2.38348000 | 4.43117000  | 0.90678000  |
| H | -1.18041000 | 3.49965000  | 1.81904000  |
| H | -0.92321000 | 5.23265000  | 1.51295000  |
| C | -0.83100000 | 5.07725000  | -1.25019000 |
| H | -1.89771000 | 5.31911000  | -1.31941000 |
| H | -0.29780000 | 5.98388000  | -0.94038000 |
| H | -0.48638000 | 4.79307000  | -2.24760000 |

|    |             |             |             |
|----|-------------|-------------|-------------|
| C  | 1.60853000  | 4.16007000  | 1.10183000  |
| H  | 2.63516000  | 3.77961000  | 1.15111000  |
| H  | 1.65649000  | 5.24650000  | 0.96272000  |
| H  | 1.12709000  | 3.95172000  | 2.06082000  |
| C  | 1.69469000  | 3.60794000  | -1.34343000 |
| H  | 1.91083000  | 4.64997000  | -1.60367000 |
| H  | 2.64561000  | 3.08336000  | -1.20072000 |
| H  | 1.17395000  | 3.13734000  | -2.18403000 |
| H  | 0.08466000  | -2.68503000 | -2.37638000 |
| H  | -5.09429000 | 2.22912000  | 1.61278000  |
| H  | 0.13004000  | -0.19053000 | -1.70334000 |
| C  | 4.25791000  | -0.98522000 | 0.48353000  |
| H  | 4.13892000  | -0.04795000 | 1.01466000  |
| C  | 6.70074000  | -0.89110000 | 1.02758000  |
| Ir | -1.07191000 | -0.31185000 | -0.57072000 |
| C  | -3.73636000 | -1.19378000 | 0.51031000  |
| C  | -3.23963000 | -2.44429000 | 0.05880000  |
| C  | -5.67095000 | -2.36510000 | 1.46999000  |
| C  | -5.14822000 | -3.56923000 | 1.05310000  |
| C  | -3.93133000 | -3.60611000 | 0.33445000  |
| N  | -2.00764000 | -2.42461000 | -0.69175000 |
| H  | -5.67249000 | -4.49697000 | 1.26216000  |
| H  | -2.91894000 | 1.99755000  | 0.43800000  |
| H  | 1.93831000  | 0.24264000  | 0.17870000  |
| N  | 5.46961000  | -1.61776000 | 0.63927000  |
| C  | 6.48435000  | -0.17404000 | 2.36987000  |
| H  | 6.15608000  | -0.88252000 | 3.13861000  |
| H  | 7.42305000  | 0.28499000  | 2.69914000  |
| H  | 5.73775000  | 0.62379000  | 2.29657000  |
| C  | 7.80042000  | -1.95119000 | 1.18502000  |
| H  | 8.74526000  | -1.48188000 | 1.47877000  |
| H  | 7.52400000  | -2.68582000 | 1.94989000  |
| H  | 7.96972000  | -2.48498000 | 0.24072000  |
| C  | 7.09373000  | 0.12275000  | -0.06476000 |
| H  | 7.25581000  | -0.38581000 | -1.02295000 |
| H  | 6.30027000  | 0.86565000  | -0.20629000 |
| H  | 8.01594000  | 0.65224000  | 0.20278000  |
| H  | -3.53392000 | -4.55483000 | -0.01608000 |
| H  | -6.61275000 | -2.32278000 | 2.01001000  |
| H  | -6.42929000 | 0.16876000  | 2.13852000  |
| H  | -1.38032000 | -3.17071000 | -0.38947000 |
| H  | -2.19699000 | -2.58352000 |             |

Thermal correction to Energy= 0.629795  
 Thermal correction to Enthalpy= 0.630945

|                                                           |   |          |          |          |
|-----------------------------------------------------------|---|----------|----------|----------|
| Thermal correction to Gibbs Free Energy= 0.478593         | H | -4.49112 | 1.68942  | -2.019   |
| Sum of electronic and zero-point Energies= -1456.011280   | H | -2.79099 | 1.62476  | -1.50807 |
| Sum of electronic and thermal Energies= -1455.962860      | H | -3.27196 | 0.94806  | -3.07376 |
| Sum of electronic and thermal Enthalpies= -1455.961710    | C | 0.49066  | 0.42701  | 2.07586  |
| Sum of electronic and thermal Free Energies= -1456.101008 | C | 0.41722  | -0.93709 | 1.66305  |
| SCF Done: E(RM11L)= -1456.0787149                         | C | 0.79614  | -1.90293 | 2.63592  |

#### 4b

##### Number of Negative Frequencies = 0

|    |          |          |          |                                                          |          |          |          |
|----|----------|----------|----------|----------------------------------------------------------|----------|----------|----------|
| Ir | 0.06967  | -1.62392 | -0.18977 | H                                                        | 1.26049  | -1.56273 | 3.90518  |
| B  | -1.82894 | -0.93326 | -0.34887 | H                                                        | 1.35689  | -0.21806 | 4.27834  |
| C  | 3.40511  | 0.84365  | -1.81427 | C                                                        | 0.96356  | 0.75155  | 3.36637  |
| C  | 1.3949   | 1.88611  | -2.64818 | H                                                        | 0.72775  | -2.95731 | 2.38225  |
| C  | 0.65128  | 0.89105  | -1.98124 | H                                                        | 1.53724  | -2.34999 | 4.60404  |
| H  | -0.432   | 0.8953   | -2.01233 | H                                                        | 1.70995  | 0.06417  | 5.26704  |
| C  | 4.56881  | -1.33519 | -0.48133 | H                                                        | 3.37042  | 2.65623  | -3.00428 |
| N  | 2.33122  | -2.34391 | -0.1167  | H                                                        | 0.87004  | 2.65337  | -3.20685 |
| N  | 1.20763  | -0.0835  | -1.2688  | H                                                        | 5.02783  | -2.19187 | 0.00488  |
| O  | -2.56812 | -1.03999 | -1.54354 | H                                                        | 2.55215  | -2.57413 | 0.8535   |
| O  | -2.6108  | -0.30653 | 0.62578  | H                                                        | 2.49292  | -3.19291 | -0.66153 |
| C  | 3.1942   | -1.28079 | -0.59002 | C                                                        | 1.01605  | 2.24275  | 3.74738  |
| C  | 2.5822   | -0.16359 | -1.22291 | H                                                        | 1.69837  | 2.75255  | 3.09973  |
| C  | 5.38238  | -0.30512 | -1.00889 | N                                                        | 1.46861  | 2.37716  | 5.13951  |
| C  | 4.81456  | 0.75627  | -1.67797 | C                                                        | 0.50989  | 3.20184  | 5.88896  |
| H  | 6.46085  | -0.37187 | -0.90157 | C                                                        | -0.90063 | 2.59832  | 5.75554  |
| H  | 5.43205  | 1.53547  | -2.11603 | H                                                        | -1.33729 | 2.91319  | 4.83082  |
| C  | 2.76629  | 1.88296  | -2.53795 | H                                                        | -0.83486 | 1.5305   | 5.77359  |
| C  | -3.98097 | -0.2438  | 0.16002  | H                                                        | -1.50978 | 2.93197  | 6.56949  |
| C  | -3.80795 | -0.29939 | -1.3997  | C                                                        | 0.51132  | 4.6337   | 5.32207  |
| H  | -0.66516 | -2.90199 | 0.47763  | H                                                        | 1.34024  | 4.75278  | 4.65603  |
| C  | -4.62577 | 1.03227  | 0.69316  | H                                                        | -0.40099 | 4.80788  | 4.7908   |
| H  | -5.64205 | 1.1509   | 0.29972  | H                                                        | 0.59572  | 5.33531  | 6.12552  |
| H  | -4.68817 | 0.98567  | 1.78612  | C                                                        | 0.91461  | 3.23743  | 7.3744   |
| H  | -4.04472 | 1.91976  | 0.42995  | H                                                        | 1.92135  | 3.58926  | 7.46144  |
| C  | -4.70343 | -1.4723  | 0.72874  | H                                                        | 0.25967  | 3.89504  | 7.90685  |
| H  | -4.25263 | -2.39888 | 0.35849  | H                                                        | 0.844    | 2.2527   | 7.787    |
| H  | -4.60994 | -1.46485 | 1.81989  | H                                                        | 0.16564  | 1.24429  | 1.4665   |
| H  | -5.76894 | -1.47373 | 0.47412  | Thermal correction to Energy=0.620406                    |          |          |          |
| C  | -4.91596 | -1.03903 | -2.14417 | Thermal correction to Enthalpy=0.621556                  |          |          |          |
| H  | -5.88502 | -0.55201 | -1.98334 | Thermal correction to Gibbs Free Energy=0.483927         |          |          |          |
| H  | -4.70919 | -1.03303 | -3.22043 | Sum of electronic and zero-point Energies=-1455.479916   |          |          |          |
| H  | -4.99174 | -2.0806  | -1.82187 | Sum of electronic and thermal Energies=-1455.432138      |          |          |          |
| C  | -3.58141 | 1.07935  | -2.031   | Sum of electronic and thermal Enthalpies=-1455.430988    |          |          |          |
|    |          |          |          | Sum of electronic and thermal Free Energies=-1455.568618 |          |          |          |
|    |          |          |          | SCF Done: E(RM11L)= -1456.16519379                       |          |          |          |

#### TS5b

**Number of Negative Frequencies = 1**

|    |          |          |          |
|----|----------|----------|----------|
| Ir | 0.18058  | -0.80513 | 0.10581  |
| B  | -0.43067 | 1.26954  | 0.05565  |
| C  | 4.5886   | -0.92763 | 0.3118   |
| C  | 4.05156  | 0.74895  | 1.95019  |
| C  | 2.6863   | 0.56625  | 1.63809  |
| H  | 1.93757  | 1.17954  | 2.11791  |
| C  | 3.64946  | -2.69665 | -1.66621 |
| N  | 1.31772  | -1.97565 | -1.20915 |
| N  | 2.24219  | -0.30888 | 0.74149  |
| O  | 0.51739  | 2.23262  | 0.51808  |
| O  | -1.03403 | 1.7642   | -1.1325  |
| C  | 2.75224  | -1.93136 | -0.95486 |
| C  | 3.19003  | -1.04265 | 0.05488  |
| C  | 5.03393  | -2.59999 | -1.39415 |
| C  | 5.49451  | -1.73009 | -0.42901 |
| H  | 5.73106  | -3.21148 | -1.95888 |
| H  | 6.5577   | -1.64349 | -0.22223 |
| C  | 5.00455  | 0.00074  | 1.3015   |
| C  | -0.19043 | 2.8167   | -1.63729 |
| C  | 0.4307   | 3.39863  | -0.31901 |
| H  | -1.17135 | -1.36608 | -0.56583 |
| C  | -1.04988 | 3.79411  | -2.43488 |
| H  | -0.46255 | 4.66377  | -2.75278 |
| H  | -1.43578 | 3.29985  | -3.33367 |
| H  | -1.90588 | 4.14411  | -1.85198 |
| C  | 0.86322  | 2.17654  | -2.55552 |
| H  | 1.49098  | 1.47606  | -1.99553 |
| H  | 0.34964  | 1.61373  | -3.34273 |
| H  | 1.50321  | 2.92825  | -3.03118 |
| C  | 1.82524  | 4.00045  | -0.4782  |
| H  | 1.81469  | 4.82883  | -1.1962  |
| H  | 2.17552  | 4.39102  | 0.48433  |
| H  | 2.54603  | 3.25204  | -0.81808 |
| C  | -0.50026 | 4.39903  | 0.38078  |
| H  | -0.56559 | 5.34946  | -0.16074 |
| H  | -1.50819 | 3.98406  | 0.4837   |
| H  | -0.11325 | 4.60139  | 1.3856   |
| C  | -0.80432 | 0.32693  | 2.5024   |
| C  | -1.34997 | 0.52587  | 1.21292  |
| C  | -2.75958 | 0.29414  | 1.06589  |
| C  | -3.53477 | -0.02689 | 2.17677  |
| C  | -2.94736 | -0.25706 | 3.43113  |
| C  | -1.578   | -0.10364 | 3.59269  |

|   |          |          |          |
|---|----------|----------|----------|
| H | -1.11159 | -0.26813 | 4.56061  |
| H | -3.57375 | -0.53948 | 4.27377  |
| H | 0.23186  | 0.58017  | 2.68305  |
| H | 6.06217  | 0.11082  | 1.5246   |
| H | 4.32169  | 1.4813   | 2.704    |
| H | 3.2882   | -3.36953 | -2.43933 |
| H | 0.98454  | -2.94358 | -1.15904 |
| H | 1.11942  | -1.66155 | -2.16296 |
| C | -5.06221 | -0.14675 | 2.02136  |
| H | -5.51098 | -0.26108 | 2.98594  |
| N | -5.3799  | -1.31758 | 1.19122  |
| C | -6.59389 | -1.04768 | 0.40746  |
| C | -6.50343 | -1.77618 | -0.94631 |
| H | -7.41236 | -2.3119  | -1.1245  |
| H | -6.35239 | -1.06037 | -1.72715 |
| H | -5.68269 | -2.46244 | -0.92791 |
| C | -6.72339 | 0.46793  | 0.16716  |
| H | -6.60995 | 0.98726  | 1.09578  |
| H | -5.96344 | 0.78709  | -0.51513 |
| H | -7.68674 | 0.6825   | -0.24612 |
| C | -7.82666 | -1.55205 | 1.18045  |
| H | -8.69601 | -1.46227 | 0.56315  |
| H | -7.68418 | -2.578   | 1.44882  |
| H | -7.9563  | -0.96631 | 2.06645  |
| H | -3.25755 | 0.48542  | 0.13835  |

Thermal correction to Energy=0.619022

Thermal correction to Enthalpy=0.620173

Thermal correction to Gibbs Free Energy=0.486147

Sum of electronic and zero-point Energies= -1455.446329

Sum of electronic and thermal Energies=-1455.399375

Sum of electronic and thermal Enthalpies=-1455.398225

Sum of electronic and thermal Free Energies=-1455.532250

SCF Done: E(RM11L) = -1456.13805901

**3****Number of Negative Frequencies = 0**

|   |          |          |          |
|---|----------|----------|----------|
| B | -0.29753 | 0.01209  | 1.32093  |
| B | -1.55035 | -1.38087 | -0.72264 |
| B | -1.56175 | 1.35225  | -0.7201  |
| C | 1.79033  | 2.68045  | -0.72271 |
| H | 0.80327  | 3.13117  | -0.77065 |
| C | 2.95187  | 3.48101  | -0.70104 |
| C | 4.22512  | 1.42535  | -0.59824 |
| C | 3.00041  | 0.71468  | -0.62227 |

|    |          |          |          |                                                          |          |          |          |
|----|----------|----------|----------|----------------------------------------------------------|----------|----------|----------|
| C  | 2.99601  | -0.72855 | -0.56811 | H                                                        | -1.82165 | -4.07289 | -3.08948 |
| C  | 4.21508  | -1.44453 | -0.48593 | H                                                        | -1.25098 | -4.23204 | -1.41923 |
| N  | 1.79886  | 1.35151  | -0.68775 | C                                                        | -4.45304 | -1.93236 | 0.21036  |
| N  | 1.79083  | -1.35914 | -0.58955 | H                                                        | -5.40779 | -2.39083 | -0.07141 |
| O  | -1.24656 | 0.71576  | 2.07019  | H                                                        | -4.46212 | -1.75616 | 1.292    |
| O  | 0.57601  | -0.66952 | 2.1844   | H                                                        | -4.3517  | -0.96154 | -0.28267 |
| O  | -2.18089 | -1.76826 | -1.92305 | C                                                        | -3.37496 | -4.16861 | 0.59873  |
| O  | -2.07127 | -2.15014 | 0.33236  | H                                                        | -3.5605  | -3.99526 | 1.66485  |
| O  | -1.3358  | 2.73536  | -0.92234 | H                                                        | -4.20892 | -4.76022 | 0.20268  |
| O  | -2.94205 | 1.15015  | -0.58046 | H                                                        | -2.45696 | -4.75536 | 0.5095   |
| C  | 5.44423  | 0.66928  | -0.52876 | C                                                        | -2.14197 | 0.61408  | 4.30917  |
| C  | 5.4396   | -0.69423 | -0.47366 | H                                                        | -1.90434 | 0.48292  | 5.37152  |
| H  | 6.39211  | 1.19546  | -0.51367 | H                                                        | -2.69237 | 1.55537  | 4.19885  |
| H  | 6.38388  | -1.22389 | -0.41648 | H                                                        | -2.80084 | -0.19878 | 3.9938   |
| C  | 4.19538  | 2.85048  | -0.64318 | C                                                        | -0.07511 | 1.93412  | 3.76961  |
| C  | 0.00699  | -0.64094 | 3.51539  | H                                                        | -0.6903  | 2.80544  | 3.52074  |
| C  | -0.87166 | 0.65817  | 3.46481  | H                                                        | 0.20506  | 2.00028  | 4.82669  |
| C  | -3.64732 | 2.3776   | -0.8562  | H                                                        | 0.83462  | 1.97948  | 3.16124  |
| C  | -2.54425 | 3.45851  | -0.58907 | C                                                        | 1.14045  | -0.61377 | 4.53603  |
| C  | -2.98993 | -2.94054 | -1.67246 | H                                                        | 0.74778  | -0.50156 | 5.55363  |
| C  | -3.25771 | -2.83277 | -0.13032 | H                                                        | 1.70171  | -1.55418 | 4.49255  |
| Ir | -0.05406 | -0.01903 | -0.6519  | H                                                        | 1.8392   | 0.20364  | 4.33912  |
| C  | -4.0952  | 2.32123  | -2.32326 | C                                                        | -0.82516 | -1.92028 | 3.67512  |
| H  | -4.69522 | 1.41731  | -2.47434 | H                                                        | -0.17181 | -2.78721 | 3.52491  |
| H  | -4.70254 | 3.18937  | -2.60342 | H                                                        | -1.27166 | -1.99717 | 4.67292  |
| H  | -3.23077 | 2.26584  | -2.99329 | H                                                        | -1.61285 | -1.96269 | 2.91743  |
| C  | -4.86604 | 2.46197  | 0.05925  | H                                                        | 2.83643  | 4.54427  | -0.73354 |
| H  | -5.37549 | 3.42682  | -0.05177 | H                                                        | 5.11189  | 3.4025   | -0.62973 |
| H  | -5.57949 | 1.67134  | -0.19972 | H                                                        | 4.18447  | -2.51268 | -0.43104 |
| H  | -4.58678 | 2.33035  | 1.10758  | H                                                        | 1.85008  | -2.20925 | -0.06629 |
| C  | -2.63249 | 4.70754  | -1.4604  | H                                                        | 1.53991  | -1.56652 | -1.53508 |
| H  | -3.57554 | 5.24001  | -1.28817 | Thermal correction to Energy= 0.763326                   |          |          |          |
| H  | -1.8107  | 5.39026  | -1.21438 | Thermal correction to Enthalpy=0.764476                  |          |          |          |
| H  | -2.5594  | 4.46433  | -2.5237  | Thermal correction to Gibbs Free Energy=0.604154         |          |          |          |
| C  | -2.43459 | 3.84625  | 0.89226  | Sum of electronic and zero-point Energies=-1795.018708   |          |          |          |
| H  | -1.53373 | 4.45486  | 1.03235  | Sum of electronic and thermal Energies= -1794.959284     |          |          |          |
| H  | -3.29795 | 4.43063  | 1.22963  | Sum of electronic and thermal Enthalpies= -1794.958133   |          |          |          |
| H  | -2.33613 | 2.94984  | 1.51102  | Sum of electronic and thermal Free Energies=-1795.118455 |          |          |          |
| C  | -4.23828 | -2.87492 | -2.54829 | SCF Done: E(RM11L) = -1795.81323958                      |          |          |          |
| H  | -3.95659 | -2.9486  | -3.60514 |                                                          |          |          |          |
| H  | -4.92105 | -3.70239 | -2.3212  | <b>4c</b>                                                |          |          |          |
| H  | -4.77222 | -1.93156 | -2.40843 | <b>Number of Negative Frequencies = 0</b>                |          |          |          |
| C  | -2.14622 | -4.16717 | -2.04729 | Ir                                                       | 0.3177   | 0.08953  | -0.15822 |
| H  | -2.71034 | -5.10115 | -1.94694 | C                                                        | -3.74619 | 1.01192  | 1.58445  |

|   |          |          |          |   |          |          |          |
|---|----------|----------|----------|---|----------|----------|----------|
| C | -2.4876  | 0.98324  | 0.93567  | C | 2.96105  | 2.52352  | 2.98764  |
| C | -1.93938 | 2.18881  | 0.35938  | H | 3.43571  | 2.07273  | 2.11131  |
| C | -2.6743  | 3.39908  | 0.40104  | H | 2.57757  | 3.50662  | 2.69105  |
| C | -0.8315  | 4.47612  | -0.73932 | H | 3.7091   | 2.67211  | 3.77453  |
| C | -0.18327 | 3.22485  | -0.71677 | C | 1.0884   | 2.31949  | 4.65152  |
| H | 0.80802  | 3.1215   | -1.14557 | H | 1.73886  | 2.32474  | 5.53424  |
| N | -1.74995 | -0.15703 | 0.84678  | H | 0.8433   | 3.35922  | 4.40604  |
| N | -0.70144 | 2.11924  | -0.1987  | H | 0.1573   | 1.80689  | 4.90743  |
| O | 2.04668  | -0.3797  | 2.33788  | C | 3.60451  | -0.07947 | 4.15935  |
| O | 0.85151  | 1.5738   | 2.363    | H | 3.7698   | 0.38792  | 5.13747  |
| O | 2.54271  | 0.26602  | -2.28499 | H | 3.78834  | -1.15487 | 4.26335  |
| O | 3.17217  | 1.20493  | -0.29868 | H | 4.33616  | 0.31901  | 3.45205  |
| O | 0.31648  | -2.88186 | 0.58156  | C | 1.18376  | -0.60212 | 4.56613  |
| O | 2.29485  | -2.31134 | -0.39837 | H | 1.4046   | -1.67322 | 4.51734  |
| C | -4.47268 | 2.25108  | 1.59622  | H | 1.24875  | -0.2848  | 5.61285  |
| C | -3.96595 | 3.38387  | 1.02883  | H | 0.15597  | -0.45417 | 4.21745  |
| H | -5.4469  | 2.28849  | 2.07064  | C | 3.74543  | -4.1456  | 0.20103  |
| H | -4.54856 | 4.29771  | 1.06175  | H | 3.79518  | -5.21612 | 0.43357  |
| C | -2.10356 | 4.57239  | -0.17428 | H | 4.45039  | -3.94324 | -0.61334 |
| C | 1.78561  | 1.66048  | 3.46536  | H | 4.07313  | -3.58059 | 1.07709  |
| C | 2.17718  | 0.15589  | 3.67496  | C | 1.9964   | -4.3724  | -1.5828  |
| C | 2.33588  | -3.74261 | -0.22499 | H | 2.70009  | -3.99596 | -2.3332  |
| C | 1.22443  | -3.97675 | 0.85391  | H | 2.06906  | -5.46557 | -1.55929 |
| C | 3.83159  | 0.87668  | -2.51965 | H | 0.98495  | -4.09576 | -1.8987  |
| C | 4.38701  | 1.05355  | -1.06328 | C | 0.47438  | -5.30062 | 0.73791  |
| B | 1.15879  | 0.42344  | 1.61777  | H | 1.1533   | -6.14408 | 0.91192  |
| B | 2.1286   | 0.53022  | -0.96431 | H | -0.31823 | -5.34371 | 1.49408  |
| B | 1.04388  | -1.81368 | -0.00077 | H | 0.00962  | -5.42752 | -0.24166 |
| C | 5.26468  | 2.28329  | -0.84648 | C | 1.73667  | -3.78936 | 2.28834  |
| H | 5.59604  | 2.32141  | 0.19753  | H | 2.25016  | -2.83008 | 2.3873   |
| H | 6.15788  | 2.24778  | -1.48181 | H | 0.87977  | -3.78478 | 2.97157  |
| H | 4.72247  | 3.20869  | -1.05862 | H | 2.40994  | -4.59986 | 2.58951  |
| C | 3.58835  | 2.21391  | -3.23296 | C | -0.21992 | 1.40994  | -3.68173 |
| H | 4.52662  | 2.72395  | -3.47802 | C | -1.25155 | 2.34325  | -3.76924 |
| H | 3.05013  | 2.03032  | -4.16911 | C | -2.55829 | 1.97433  | -3.41735 |
| H | 2.9792   | 2.88239  | -2.61506 | C | -2.82918 | 0.67757  | -2.99337 |
| C | 4.65369  | -0.04787 | -3.4143  | C | -1.79514 | -0.2737  | -2.91041 |
| H | 4.18647  | -0.12063 | -4.40328 | C | -0.48664 | 0.10768  | -3.24863 |
| H | 5.67203  | 0.33631  | -3.54876 | H | 0.80093  | 1.688    | -3.91805 |
| H | 4.71208  | -1.05617 | -2.99682 | H | -1.04252 | 3.35915  | -4.09459 |
| C | 5.09463  | -0.20317 | -0.53557 | H | -3.36119 | 2.70539  | -3.46886 |
| H | 6.0545   | -0.37609 | -1.03578 | H | -3.83621 | 0.38045  | -2.71761 |
| H | 5.28355  | -0.07614 | 0.53621  | C | -2.05152 | -1.66178 | -2.47628 |
| H | 4.45427  | -1.08115 | -0.65816 | N | -3.23428 | -2.12367 | -2.36133 |





|   |          |          |          |
|---|----------|----------|----------|
| H | -2.55661 | 4.50597  | 0.78476  |
| H | -2.08409 | 5.79929  | -0.33789 |
| C | -1.04989 | 4.09363  | -2.31478 |
| H | -1.97331 | 3.78002  | -2.81252 |
| H | -0.86509 | 5.14535  | -2.55818 |
| H | -0.2292  | 3.49045  | -2.71701 |
| C | -0.02884 | 4.20354  | 1.47742  |
| H | 0.94294  | 4.09164  | 1.97137  |
| H | -0.41539 | 5.20273  | 1.70579  |
| H | -0.7038  | 3.45233  | 1.89751  |
| C | 1.11316  | 5.03542  | -0.59671 |
| H | 0.6352   | 6.02207  | -0.60579 |
| H | 2.01327  | 5.10378  | 0.02236  |
| H | 1.42081  | 4.78872  | -1.61562 |
| C | -2.93338 | -2.87662 | -3.24777 |
| H | -2.66284 | -3.8389  | -2.79903 |
| H | -3.66592 | -3.0633  | -4.04083 |
| H | -2.03364 | -2.44688 | -3.69904 |
| C | -4.76189 | -2.5646  | -1.55715 |
| H | -5.57917 | -2.56327 | -2.28773 |
| H | -4.57293 | -3.60356 | -1.26311 |
| H | -5.08391 | -2.0165  | -0.66843 |
| C | -3.96024 | -0.26745 | -4.09048 |
| H | -4.93045 | -0.71592 | -4.33465 |
| H | -4.01527 | 0.80339  | -4.31661 |
| H | -3.19881 | -0.70839 | -4.7392  |
| C | -4.58797 | 0.34667  | -1.73582 |
| H | -4.48528 | 1.40752  | -1.9867  |
| H | -5.63202 | 0.05356  | -1.89346 |
| H | -4.33355 | 0.22621  | -0.67798 |
| H | -0.11109 | -2.69096 | -2.1951  |
| H | 1.27742  | -5.63666 | 2.39879  |
| H | -0.91596 | -5.35165 | 1.21927  |
| H | 4.09986  | -0.40332 | 2.44399  |
| H | 2.45954  | 0.72067  | 0.98068  |
| H | 1.16699  | 0.55638  | 1.99365  |
| C | 5.11291  | -1.36443 | -2.57435 |
| H | 5.66467  | -2.16211 | -3.0262  |
| N | 5.23247  | -0.15555 | -3.40212 |
| C | 6.20016  | 0.76503  | -2.78809 |
| C | 6.22772  | 0.53979  | -1.2649  |
| H | 5.24818  | 0.69565  | -0.86353 |
| H | 6.54272  | -0.46166 | -1.05809 |
| H | 6.91141  | 1.22888  | -0.81477 |

|   |         |          |          |
|---|---------|----------|----------|
| C | 7.60083 | 0.50147  | -3.37141 |
| H | 7.54522 | 0.48662  | -4.43986 |
| H | 8.26872 | 1.27716  | -3.05976 |
| H | 7.96174 | -0.44251 | -3.01989 |
| C | 5.78569 | 2.21825  | -3.08469 |
| H | 6.64874 | 2.84971  | -3.04869 |
| H | 5.34492 | 2.2718   | -4.05822 |
| H | 5.07543 | 2.54293  | -2.35325 |
| H | 3.10552 | 0.08633  | -1.52034 |

Thermal correction to Energy=1.014856

Thermal correction to Enthalpy=1.016006

Thermal correction to Gibbs Free Energy=0.817029

Sum of electronic and zero-point Energies=-2277.742605

Sum of electronic and thermal Energies=-2277.664572

Sum of electronic and thermal Enthalpies=-2277.663422

Sum of electronic and thermal Free Energies=-2277.862399

SCF Done: E(RM11L) = -2278.75636911

## 6c

### Number of Negative Frequencies = 0

|    |          |          |          |
|----|----------|----------|----------|
| B  | 0.96329  | 0.90005  | -1.1662  |
| B  | 1.10121  | 0.83242  | 1.76939  |
| B  | -0.87252 | 1.7832   | -0.38162 |
| C  | -1.45891 | -3.16189 | -2.52596 |
| C  | -0.84    | -2.28294 | -1.66214 |
| C  | 0.48951  | -2.53364 | -1.22432 |
| C  | 1.19582  | -3.6736  | -1.71347 |
| C  | 2.54776  | -3.88925 | -1.29049 |
| C  | 3.11194  | -2.97747 | -0.40917 |
| C  | 2.32477  | -1.8913  | 0.04125  |
| H  | 2.73637  | -1.17599 | 0.74292  |
| C  | 2.78795  | 1.75435  | -2.29074 |
| C  | 1.92963  | 0.86398  | -3.26532 |
| C  | 2.08881  | 2.38494  | 3.15609  |
| C  | 2.8942   | 1.04151  | 3.22811  |
| C  | -2.31107 | 3.08117  | -1.64755 |
| C  | -1.54146 | 3.9691   | -0.60654 |
| Ir | -0.16684 | -0.01928 | 0.41816  |
| N  | -1.49298 | -1.09346 | -1.17629 |
| N  | 1.07381  | -1.66731 | -0.33103 |
| O  | 2.22888  | 1.42519  | -0.98991 |
| O  | 0.69326  | 0.68892  | -2.5141  |
| O  | 0.84474  | 1.95945  | 2.5481   |
| O  | 2.36725  | 0.32402  | 2.08388  |

|   |          |          |          |                                         |          |          |          |
|---|----------|----------|----------|-----------------------------------------|----------|----------|----------|
| O | -2.05138 | 1.74233  | -1.14267 | C                                       | -3.81695 | 3.31571  | -1.69804 |
| O | -0.4571  | 3.09356  | -0.20069 | H                                       | -4.03036 | 4.34414  | -2.01193 |
| H | -1.18681 | 0.99199  | 1.14787  | H                                       | -4.27483 | 2.6383   | -2.42706 |
| C | -0.79812 | -1.4638  | 1.90251  | H                                       | -4.29166 | 3.14189  | -0.73036 |
| C | 0.16039  | -2.18311 | 2.64939  | C                                       | 2.57052  | 0.20763  | 4.47315  |
| C | -0.17656 | -3.22693 | 3.51489  | H                                       | 3.00862  | -0.79001 | 4.35935  |
| H | 0.60409  | -3.74018 | 4.0741   | H                                       | 2.9815   | 0.66072  | 5.38186  |
| C | -1.51458 | -3.60588 | 3.66882  | H                                       | 1.48965  | 0.08824  | 4.59653  |
| H | -1.78906 | -4.41697 | 4.33922  | C                                       | 4.40398  | 1.18095  | 3.06261  |
| C | -2.4925  | -2.91607 | 2.96013  | H                                       | 4.8283   | 1.80032  | 3.86138  |
| H | -3.54137 | -3.18229 | 3.06652  | H                                       | 4.87655  | 0.1931   | 3.1149   |
| C | -2.15122 | -1.85395 | 2.099    | H                                       | 4.66202  | 1.627    | 2.09888  |
| C | -0.77551 | -4.30439 | -2.99559 | C                                       | 1.78784  | 3.0279   | 4.50554  |
| C | 0.52384  | -4.55007 | -2.60795 | H                                       | 2.71503  | 3.28222  | 5.03242  |
| H | 1.03833  | -5.42611 | -2.98547 | H                                       | 1.21869  | 3.95243  | 4.35699  |
| H | -1.27948 | -4.98652 | -3.67398 | H                                       | 1.19459  | 2.36621  | 5.14217  |
| C | 4.27815  | 1.42818  | -2.26843 | C                                       | 2.71984  | 3.4073   | 2.20132  |
| H | 4.72848  | 1.58533  | -3.2552  | H                                       | 2.01371  | 4.23045  | 2.04914  |
| H | 4.7871   | 2.08481  | -1.55426 | H                                       | 3.65194  | 3.82143  | 2.60172  |
| H | 4.45846  | 0.39458  | -1.96188 | H                                       | 2.91699  | 2.95118  | 1.22578  |
| C | 2.57823  | 3.25809  | -2.49278 | H                                       | 1.20814  | -1.90933 | 2.55896  |
| H | 3.07075  | 3.7984   | -1.67764 | C                                       | -3.24491 | -1.15212 | 1.38899  |
| H | 3.002    | 3.60289  | -3.44189 | N                                       | -4.33159 | -1.73721 | 1.05482  |
| H | 1.51545  | 3.51327  | -2.46462 | C                                       | -5.39879 | -1.01365 | 0.33829  |
| C | 1.60169  | 1.5091   | -4.6078  | C                                       | -6.68559 | -1.22668 | 1.15708  |
| H | 2.51888  | 1.70151  | -5.17617 | H                                       | -7.55222 | -0.80139 | 0.63682  |
| H | 0.97263  | 0.83382  | -5.19833 | H                                       | -6.86735 | -2.29499 | 1.32003  |
| H | 1.0635   | 2.45166  | -4.48742 | H                                       | -6.60311 | -0.74273 | 2.13775  |
| C | 2.51373  | -0.53601 | -3.48696 | C                                       | -5.53346 | -1.70987 | -1.03069 |
| H | 1.77783  | -1.15062 | -4.01537 | H                                       | -6.38105 | -1.30095 | -1.59337 |
| H | 3.42717  | -0.49905 | -4.08979 | H                                       | -4.6247  | -1.56106 | -1.62792 |
| H | 2.74537  | -1.02612 | -2.53802 | H                                       | -5.68553 | -2.78773 | -0.90513 |
| C | -0.94843 | 5.2555   | -1.16831 | C                                       | -5.16075 | 0.49024  | 0.12256  |
| H | -0.40771 | 5.78895  | -0.37886 | H                                       | -6.00968 | 0.92291  | -0.41893 |
| H | -0.24649 | 5.05441  | -1.98103 | H                                       | -5.06588 | 1.02461  | 1.07604  |
| H | -1.73984 | 5.91422  | -1.54368 | H                                       | -4.25644 | 0.68411  | -0.46262 |
| C | -2.36566 | 4.26484  | 0.65238  | H                                       | -3.04229 | -0.10339 | 1.15095  |
| H | -1.70934 | 4.70223  | 1.41172  | H                                       | -1.58377 | -0.39398 | -1.91436 |
| H | -3.17877 | 4.96986  | 0.44913  | H                                       | -2.43572 | -1.30755 | -0.85336 |
| H | -2.79389 | 3.34566  | 1.06632  | H                                       | -2.47769 | -2.96166 | -2.84654 |
| C | -1.71938 | 3.15057  | -3.05862 | H                                       | 4.11588  | -3.05079 | -0.04635 |
| H | -2.17876 | 2.37005  | -3.67491 | H                                       | 3.09062  | -4.73428 | -1.65945 |
| H | -1.90885 | 4.11971  | -3.53235 | Thermal correction to Energy=1.018235   |          |          |          |
| H | -0.64386 | 2.96528  | -3.0368  | Thermal correction to Enthalpy=1.019385 |          |          |          |

|                                                          |          |          |          |   |          |          |          |
|----------------------------------------------------------|----------|----------|----------|---|----------|----------|----------|
| Thermal correction to Gibbs Free Energy=0.824097         |          |          |          | H | -4.07567 | 0.43141  | -3.70118 |
| Sum of electronic and zero-point Energies=-2277.765414   |          |          |          | C | -4.59637 | 0.08866  | -1.14493 |
| Sum of electronic and thermal Energies=-2277.687950      |          |          |          | H | -4.82608 | -0.30389 | -0.14869 |
| Sum of electronic and thermal Enthalpies=-2277.686800    |          |          |          | H | -5.54015 | 0.25246  | -1.67572 |
| Sum of electronic and thermal Free Energies=-2277.882088 |          |          |          | H | -4.01946 | -0.67267 | -1.67656 |
| SCF Done: E(RM11L) = -2278.78104258                      |          |          |          | C | -4.62084 | 2.41939  | -0.2287  |
|                                                          |          |          |          | H | -5.49656 | 2.73148  | -0.80944 |
| <b>7c</b>                                                |          |          |          | H | -4.97721 | 1.97961  | 0.70954  |
| <b>Number of Negative Frequencies = 0</b>                |          |          |          | H | -4.0324  | 3.30658  | 0.01676  |
| Ir                                                       | 0.27779  | -0.08741 | -0.68893 | C | -1.12875 | 5.04297  | 0.68036  |
| B                                                        | -1.55177 | 0.84709  | -1.11307 | H | -1.11589 | 5.75571  | 1.5132   |
| B                                                        | 0.15234  | 1.748    | 0.2969   | H | -0.9405  | 5.59927  | -0.24426 |
| O                                                        | -1.91211 | 1.22723  | -2.40014 | H | -2.12668 | 4.60469  | 0.61531  |
| O                                                        | -2.60835 | 1.07931  | -0.23217 | C | 1.33602  | 4.62382  | 0.77802  |
| C                                                        | 1.30511  | -3.16003 | 2.41082  | H | 2.11816  | 3.8695   | 0.87948  |
| C                                                        | 2.73853  | -3.74914 | 0.06733  | H | 1.44655  | 5.08165  | -0.21035 |
| N                                                        | 1.77201  | -1.7439  | -0.92986 | H | 1.48275  | 5.39867  | 1.53794  |
| N                                                        | 0.4634   | -1.06349 | 1.39659  | C | 0.5926   | 3.50702  | 3.35918  |
| O                                                        | 0.23143  | 1.79011  | 1.69626  | H | 0.31084  | 4.51268  | 3.69186  |
| O                                                        | -0.13201 | 3.01395  | -0.20528 | H | 0.41811  | 2.81497  | 4.19074  |
| C                                                        | 1.91767  | -2.58446 | 0.14124  | H | 1.6618   | 3.50029  | 3.13424  |
| C                                                        | 1.22278  | -2.29003 | 1.34434  | C | -1.70784 | 2.90227  | 2.55986  |
| O                                                        | 2.94474  | 0.37098  | 0.7135   | H | -2.1429  | 3.83431  | 2.93632  |
| O                                                        | 2.82652  | 1.86745  | -1.00582 | H | -2.29796 | 2.53976  | 1.71517  |
| C                                                        | 2.80815  | -4.61808 | 1.18707  | H | -1.76487 | 2.15419  | 3.3576   |
| C                                                        | 2.0922   | -4.33366 | 2.32884  | C | 4.87881  | 0.94213  | -1.82145 |
| H                                                        | 3.42615  | -5.50915 | 1.1221   | H | 4.68996  | 1.44693  | -2.77468 |
| H                                                        | 2.13513  | -5.00304 | 3.18284  | H | 5.96185  | 0.84526  | -1.69211 |
| C                                                        | 3.44024  | -3.98457 | -1.14314 | H | 4.44348  | -0.06011 | -1.88041 |
| C                                                        | -0.05113 | 3.98077  | 0.87403  | C | 4.84334  | 3.16425  | -0.66886 |
| C                                                        | -0.24132 | 3.08386  | 2.1541   | H | 4.77654  | 3.60831  | -1.668   |
| C                                                        | 4.2447   | 1.76087  | -0.6909  | H | 4.31381  | 3.82078  | 0.0251   |
| C                                                        | 4.24489  | 1.01513  | 0.70247  | H | 5.9002   | 3.12917  | -0.38128 |
| C                                                        | -3.19344 | 1.90394  | -2.35734 | C | 4.29113  | 1.9521   | 1.91292  |
| C                                                        | -3.80018 | 1.39105  | -1.00071 | H | 4.13502  | 1.36429  | 2.82397  |
| H                                                        | 0.42701  | 0.49957  | -2.14593 | H | 5.2572   | 2.46136  | 1.99353  |
| C                                                        | 3.29512  | -3.10795 | -2.19349 | H | 3.50164  | 2.7054   | 1.86316  |
| C                                                        | -2.90007 | 3.40739  | -2.36063 | C | 5.31144  | -0.06903 | 0.84952  |
| H                                                        | -2.27105 | 3.67352  | -1.50892 | H | 6.31834  | 0.35891  | 0.78745  |
| H                                                        | -2.35103 | 3.66061  | -3.27426 | H | 5.20749  | -0.55207 | 1.82739  |
| H                                                        | -3.81911 | 4.00298  | -2.33607 | H | 5.21204  | -0.84179 | 0.08341  |
| C                                                        | -3.98991 | 1.51616  | -3.59985 | C | 2.43444  | -1.99767 | -2.04786 |
| H                                                        | -4.99752 | 1.94673  | -3.56627 | H | 2.28136  | -1.30008 | -2.86329 |
| H                                                        | -3.48735 | 1.89963  | -4.49466 | B | 2.13337  | 0.92793  | -0.2685  |



|   |          |          |          |                                                          |          |          |          |
|---|----------|----------|----------|----------------------------------------------------------|----------|----------|----------|
| H | -3.7808  | 4.73537  | -0.22894 | N                                                        | -1.5311  | -3.48337 | 1.13074  |
| H | -4.47781 | 3.19917  | 0.30841  | C                                                        | -2.25051 | -3.36006 | 2.41275  |
| C | -1.47097 | 4.72021  | 1.12145  | C                                                        | -3.3944  | -4.39142 | 2.34834  |
| H | -0.44806 | 4.38347  | 1.29872  | H                                                        | -4.10082 | -4.12963 | 1.55146  |
| H | -1.46165 | 5.32722  | 0.21009  | H                                                        | -3.00106 | -5.39259 | 2.13904  |
| H | -1.79208 | 5.35293  | 1.95589  | H                                                        | -3.94184 | -4.42455 | 3.29794  |
| C | -1.95142 | 3.01477  | 3.43534  | C                                                        | -1.25696 | -3.7594  | 3.51958  |
| H | -2.70028 | 3.73745  | 3.77982  | H                                                        | -0.47357 | -2.99979 | 3.63086  |
| H | -1.90716 | 2.20059  | 4.16776  | H                                                        | -1.76921 | -3.85608 | 4.48425  |
| H | -0.975   | 3.50526  | 3.41717  | H                                                        | -0.77619 | -4.71491 | 3.28241  |
| C | -3.58444 | 1.58856  | 2.17055  | C                                                        | -2.82587 | -1.96824 | 2.72374  |
| H | -4.45125 | 2.16776  | 2.50667  | H                                                        | -3.30769 | -1.97858 | 3.70789  |
| H | -3.80779 | 1.12558  | 1.20624  | H                                                        | -2.04242 | -1.20195 | 2.74422  |
| H | -3.4086  | 0.78962  | 2.89715  | H                                                        | -3.57623 | -1.65983 | 1.98809  |
| C | 3.73603  | 3.69355  | -1.02347 | H                                                        | -1.98085 | -1.5477  | 0.49851  |
| H | 3.4163   | 4.20331  | -1.9383  | H                                                        | 1.52991  | -2.74833 | 2.59695  |
| H | 4.70449  | 4.1049   | -0.72004 | H                                                        | -0.05022 | -1.11434 | 1.5969   |
| H | 3.86368  | 2.6309   | -1.25641 | H                                                        | 1.02158  | 0.13272  | 1.65123  |
| C | 2.49161  | 5.38157  | 0.35314  | H                                                        | 5.3628   | -2.48437 | -1.94871 |
| H | 2.32621  | 5.92863  | -0.58148 | H                                                        | 4.63007  | -0.65754 | -3.49984 |
| H | 1.63587  | 5.56647  | 1.00665  | Thermal correction to Energy=0.992975                    |          |          |          |
| H | 3.3906   | 5.78848  | 0.8304   | Thermal correction to Enthalpy=0.993919                  |          |          |          |
| C | 2.21949  | 3.52608  | 2.59108  | Thermal correction to Gibbs Free Energy= 0.857596        |          |          |          |
| H | 2.26302  | 2.75643  | 3.36927  | Sum of electronic and zero-point Energies=-2277.759108   |          |          |          |
| H | 2.71961  | 4.42508  | 2.96612  | Sum of electronic and thermal Energies=-2277.706361      |          |          |          |
| H | 1.1673   | 3.75772  | 2.40943  | Sum of electronic and thermal Enthalpies=-2277.705417    |          |          |          |
| C | 4.34746  | 2.63773  | 1.61268  | Sum of electronic and thermal Free Energies=-2277.841740 |          |          |          |
| H | 4.93628  | 3.54162  | 1.80644  | SCF Done: E(RM11L)= -2278.77461359                       |          |          |          |
| H | 4.40412  | 2.00039  | 2.50224  |                                                          |          |          |          |
| H | 4.80337  | 2.09504  | 0.78088  | <b>9c</b>                                                |          |          |          |
| C | 2.88947  | -0.17819 | -2.31181 | <b>Number of Negative Frequencies = 0</b>                |          |          |          |
| H | 2.5191   | 0.58483  | -2.9878  | B                                                        | -0.92496 | 2.45436  | 0.37261  |
| B | 1.27206  | 2.06499  | -0.06852 | B                                                        | 1.68561  | 1.61357  | 0.70723  |
| C | -0.89852 | -2.61977 | -1.04117 | C                                                        | -3.93839 | -1.0692  | -0.54947 |
| C | -0.55974 | -1.45287 | -1.77574 | C                                                        | -2.61892 | -0.6048  | -0.33558 |
| C | -0.1096  | -1.64533 | -3.09828 | C                                                        | -1.71698 | -0.41933 | -1.44254 |
| C | 0.05978  | -2.91179 | -3.65641 | C                                                        | -2.14742 | -0.68818 | -2.76145 |
| C | -0.23922 | -4.05111 | -2.89826 | C                                                        | 0.05059  | -0.04534 | -3.533   |
| C | -0.7251  | -3.89863 | -1.60435 | C                                                        | 0.37976  | 0.19643  | -2.18452 |
| H | 0.11456  | -0.76999 | -3.7013  | H                                                        | 1.36903  | 0.55288  | -1.92095 |
| H | 0.41531  | -3.01306 | -4.67973 | N                                                        | -2.14767 | -0.317   | 0.90695  |
| H | -0.99837 | -4.76612 | -1.00987 | N                                                        | -0.45547 | 0.02186  | -1.16537 |
| H | -0.11614 | -5.04429 | -3.32342 | O                                                        | -1.53113 | 3.37126  | 1.2422   |
| C | -1.51349 | -2.51151 | 0.29946  | O                                                        | -1.06586 | 2.90064  | -0.95212 |

|    |          |          |          |   |          |          |          |
|----|----------|----------|----------|---|----------|----------|----------|
| O  | 1.94673  | 2.99731  | 0.76173  | H | 2.58621  | 4.38213  | -1.35138 |
| O  | 2.91343  | 0.94072  | 0.49685  | H | 4.24824  | 3.79542  | -1.57006 |
| C  | -4.34983 | -1.32331 | -1.90097 | C | 5.15747  | 1.52053  | -0.25736 |
| C  | -3.49726 | -1.14091 | -2.95117 | H | 5.9218   | 2.30676  | -0.24235 |
| H  | -5.35938 | -1.67018 | -2.09172 | H | 5.62768  | 0.58905  | 0.0724   |
| H  | -3.84662 | -1.34679 | -3.95671 | H | 4.82189  | 1.38179  | -1.28778 |
| C  | -1.22989 | -0.5082  | -3.83596 | C | 1.56666  | -0.58402 | 3.82885  |
| C  | -1.54889 | 4.26288  | -0.929   | H | 2.07322  | -0.80302 | 4.77653  |
| C  | -2.28343 | 4.32421  | 0.45642  | H | 2.09921  | 0.22557  | 3.32523  |
| C  | 3.3023   | 3.24473  | 0.33365  | H | 0.55467  | -0.23835 | 4.03742  |
| C  | 4.00056  | 1.88595  | 0.66873  | C | 3.02012  | -2.15346 | 2.54301  |
| Ir | -0.12017 | 0.7029   | 0.88096  | H | 3.39062  | -1.32574 | 1.93258  |
| C  | 1.58272  | -1.82932 | 2.95933  | H | 3.66841  | -2.2685  | 3.41777  |
| C  | 0.80453  | -3.04918 | 3.56071  | H | 3.07154  | -3.07268 | 1.95042  |
| B  | 0.30146  | -2.82377 | 1.34412  | C | 1.66558  | -4.01196 | 4.36813  |
| O  | 0.33372  | -3.73865 | 2.36129  | H | 2.11716  | -3.49523 | 5.22206  |
| O  | 0.84573  | -1.60492 | 1.69629  | H | 1.04827  | -4.83101 | 4.75229  |
| H  | -0.09356 | 1.25203  | 2.39582  | H | 2.4632   | -4.44407 | 3.75901  |
| C  | -0.3212  | 5.17964  | -0.99378 | C | -0.4465  | -2.64662 | 4.34659  |
| H  | 0.34421  | 4.98626  | -0.14797 | H | -1.04664 | -3.54222 | 4.53858  |
| H  | 0.23375  | 4.96362  | -1.9131  | H | -0.18922 | -2.19156 | 5.30806  |
| H  | -0.60162 | 6.23875  | -1.00411 | H | -1.05837 | -1.93993 | 3.77695  |
| C  | -2.44299 | 4.49059  | -2.14434 | C | -0.29409 | -3.21425 | -0.04809 |
| H  | -2.89268 | 5.49025  | -2.11765 | C | -1.59769 | -3.73963 | -0.07411 |
| H  | -1.84851 | 4.41231  | -3.06197 | C | 0.4267   | -3.14151 | -1.26321 |
| H  | -3.24421 | 3.74879  | -2.19971 | C | -2.19295 | -4.15043 | -1.26608 |
| C  | -3.72885 | 3.81113  | 0.389    | H | -2.15671 | -3.81606 | 0.85516  |
| H  | -4.10836 | 3.68217  | 1.40856  | C | -0.17402 | -3.5691  | -2.45902 |
| H  | -4.38825 | 4.50975  | -0.13795 | C | -1.47477 | -4.0626  | -2.46348 |
| H  | -3.77481 | 2.83985  | -0.11473 | H | -3.20892 | -4.53581 | -1.26398 |
| C  | -2.23943 | 5.68213  | 1.15097  | H | 0.40092  | -3.51501 | -3.3779  |
| H  | -2.72527 | 6.45142  | 0.53901  | H | -1.9302  | -4.38319 | -3.39697 |
| H  | -2.76939 | 5.62727  | 2.10887  | C | 1.8349   | -2.68853 | -1.25597 |
| H  | -1.21141 | 5.99347  | 1.3531   | H | 2.21752  | -2.39084 | -0.27693 |
| C  | 4.45641  | 1.79298  | 2.131    | N | 2.55272  | -2.67329 | -2.3109  |
| H  | 4.73486  | 0.75714  | 2.35213  | C | 3.98149  | -2.31333 | -2.25409 |
| H  | 5.3249   | 2.43154  | 2.32738  | C | 4.16615  | -1.0773  | -3.15296 |
| H  | 3.65014  | 2.08118  | 2.81284  | H | 3.63244  | -0.21725 | -2.73611 |
| C  | 3.84986  | 4.45582  | 1.08422  | H | 5.22815  | -0.81722 | -3.23306 |
| H  | 4.90952  | 4.61564  | 0.85152  | H | 3.77898  | -1.26733 | -4.15937 |
| H  | 3.30006  | 5.35613  | 0.78701  | C | 4.73194  | -3.51174 | -2.86704 |
| H  | 3.74331  | 4.34026  | 2.16592  | H | 4.59899  | -4.40756 | -2.24859 |
| C  | 3.25999  | 3.53832  | -1.17328 | H | 4.35218  | -3.73299 | -3.87097 |
| H  | 2.87183  | 2.67793  | -1.72864 | H | 5.80528  | -3.29946 | -2.93872 |

|                                                          |          |          |          |    |          |          |          |
|----------------------------------------------------------|----------|----------|----------|----|----------|----------|----------|
| C                                                        | 4.53284  | -2.01517 | -0.85063 | Ir | 0.87529  | 0.2936   | -0.77313 |
| H                                                        | 4.01608  | -1.16915 | -0.38738 | C  | -0.05146 | 3.76227  | -1.29768 |
| H                                                        | 4.44186  | -2.8854  | -0.18987 | C  | -1.3445  | 4.2379   | -2.03317 |
| H                                                        | 5.59685  | -1.76351 | -0.92157 | C  | -4.25015 | 1.18729  | 2.19069  |
| H                                                        | -1.53192 | -0.73399 | -4.8373  | C  | -4.75049 | 0.38914  | 0.93181  |
| H                                                        | 0.79853  | 0.12379  | -4.27924 | B  | -1.85551 | 2.53108  | -0.59136 |
| H                                                        | -4.57464 | -1.22121 | 0.29727  | B  | -2.90349 | 1.61453  | 0.38189  |
| H                                                        | -2.58928 | -0.9133  | 1.57732  | O  | -3.60985 | 0.49264  | 0.01986  |
| H                                                        | -2.34836 | 0.63769  | 1.1267   | O  | -3.28873 | 2.11697  | 1.60274  |
| Thermal correction to Energy=1.018844                    |          |          |          | O  | -2.39692 | 3.61848  | -1.23086 |
| Thermal correction to Enthalpy=1.019994                  |          |          |          | O  | -0.48625 | 2.44664  | -0.76698 |
| Thermal correction to Gibbs Free Energy=0.822431         |          |          |          | H  | 1.4858   | 0.66645  | -2.22084 |
| Sum of electronic and zero-point Energies=-2277.781573   |          |          |          | C  | 4.33073  | -3.0685  | 0.23392  |
| Sum of electronic and thermal Energies=-2277.703919      |          |          |          | H  | 4.66917  | -2.15423 | -0.26194 |
| Sum of electronic and thermal Enthalpies=-2277.702769    |          |          |          | H  | 4.36354  | -2.89757 | 1.31508  |
| Sum of electronic and thermal Free Energies=-2277.900332 |          |          |          | H  | 5.01993  | -3.88628 | -0.00475 |
| SCF Done: E(RM11L) = -2278.80804193                      |          |          |          | C  | 2.40404  | -4.64566 | 0.56359  |
|                                                          |          |          |          | H  | 2.93141  | -5.53963 | 0.21043  |
|                                                          |          |          |          | H  | 2.59532  | -4.54209 | 1.63792  |
|                                                          |          |          |          | H  | 1.3296   | -4.79627 | 0.42892  |
|                                                          |          |          |          | C  | 1.4177   | -4.1948  | -2.14208 |
|                                                          |          |          |          | H  | 1.2103   | -3.99359 | -3.19862 |
|                                                          |          |          |          | H  | 1.53961  | -5.2762  | -2.01458 |
|                                                          |          |          |          | H  | 0.548    | -3.86934 | -1.56155 |
|                                                          |          |          |          | C  | 3.87918  | -3.89747 | -2.53425 |
|                                                          |          |          |          | H  | 4.14404  | -4.92832 | -2.27031 |
|                                                          |          |          |          | H  | 3.64148  | -3.87272 | -3.60392 |
|                                                          |          |          |          | H  | 4.7513   | -3.25951 | -2.36932 |
|                                                          |          |          |          | C  | 4.21726  | 3.74384  | 0.38206  |
|                                                          |          |          |          | H  | 3.48735  | 4.55578  | 0.46542  |
|                                                          |          |          |          | H  | 5.20592  | 4.14382  | 0.63316  |
|                                                          |          |          |          | H  | 4.23252  | 3.40559  | -0.65863 |
|                                                          |          |          |          | C  | 6.06019  | 1.48423  | 0.60705  |
|                                                          |          |          |          | H  | 6.64177  | 2.0237   | 1.36406  |
|                                                          |          |          |          | H  | 6.53553  | 0.50975  | 0.44698  |
|                                                          |          |          |          | H  | 6.11107  | 2.03925  | -0.33325 |
|                                                          |          |          |          | C  | 4.57945  | 0.3244   | 2.2634   |
|                                                          |          |          |          | H  | 3.55071  | 0.16107  | 2.6014   |
|                                                          |          |          |          | H  | 4.98624  | -0.64395 | 1.95706  |
|                                                          |          |          |          | H  | 5.17183  | 0.69772  | 3.1062   |
|                                                          |          |          |          | C  | 3.81399  | 3.0952   | 2.76878  |
|                                                          |          |          |          | H  | 4.83292  | 3.32036  | 3.10518  |
|                                                          |          |          |          | H  | 3.22059  | 4.01325  | 2.8489   |
|                                                          |          |          |          | H  | 3.37958  | 2.35573  | 3.44678  |

**10**

**Number of Negative Frequencies = 0**

|   |          |          |          |
|---|----------|----------|----------|
| B | 1.90687  | -1.41722 | -0.87155 |
| B | 2.52659  | 1.11011  | 0.07034  |
| C | -1.48293 | -1.07298 | -2.61545 |
| H | -1.12489 | -0.38566 | -3.37626 |
| C | -2.4051  | -2.08524 | -2.95666 |
| C | -2.27854 | -2.80807 | -0.65018 |
| C | -1.39122 | -1.73408 | -0.40963 |
| C | -0.87416 | -1.49672 | 0.91335  |
| C | -1.23557 | -2.34182 | 1.9874   |
| N | -0.9837  | -0.89394 | -1.39934 |
| N | -0.02362 | -0.44265 | 1.07631  |
| O | 2.43188  | -2.02617 | -2.02072 |
| O | 2.06665  | -2.27916 | 0.22607  |
| O | 3.86306  | 0.67377  | -0.00323 |
| O | 2.46685  | 2.2001   | 0.97073  |
| C | -2.6014  | -3.67183 | 0.45149  |
| C | -2.10365 | -3.45157 | 1.70384  |
| H | -3.26211 | -4.51584 | 0.28675  |
| H | -2.37967 | -4.12478 | 2.50772  |
| C | -2.80521 | -2.98103 | -1.96357 |
| C | 2.88868  | -3.3979  | -0.1707  |
| C | 2.67715  | -3.42067 | -1.72504 |
| C | 4.61861  | 1.28532  | 1.0667   |
| C | 3.81245  | 2.6028   | 1.3242   |



|   |          |          |          |
|---|----------|----------|----------|
| C | 1.1622   | 3.61746  | -2.20008 |
| H | 1.39566  | 4.59341  | -2.64283 |
| H | 2.02278  | 3.28458  | -1.61828 |
| H | 0.99863  | 2.89609  | -3.00126 |
| C | 0.29898  | 4.5987   | -0.06414 |
| H | 1.04705  | 4.04907  | 0.51216  |
| H | 0.70752  | 5.57397  | -0.34961 |
| H | -0.58007 | 4.76101  | 0.56923  |
| C | -1.55526 | 5.74707  | -2.0351  |
| H | -0.72658 | 6.24732  | -2.54882 |
| H | -2.48171 | 5.9931   | -2.56537 |
| H | -1.62942 | 6.1466   | -1.02056 |
| C | -1.48181 | 3.66967  | -3.44931 |
| H | -2.49956 | 3.85403  | -3.80867 |
| H | -0.78024 | 4.14427  | -4.14267 |
| H | -1.30538 | 2.58885  | -3.45844 |
| C | -5.0535  | -1.08132 | 1.18447  |
| H | -5.86257 | -1.18158 | 1.91709  |
| H | -5.37852 | -1.55921 | 0.25416  |
| H | -4.17834 | -1.61797 | 1.55198  |
| C | -5.92776 | 1.06046  | 0.21667  |
| H | -6.09048 | 0.56306  | -0.74519 |
| H | -6.84955 | 0.9882   | 0.80299  |
| H | -5.7206  | 2.11742  | 0.01878  |
| C | -3.47141 | 0.32486  | 3.18489  |
| H | -2.9947  | 0.97264  | 3.92783  |
| H | -4.12608 | -0.37913 | 3.70926  |
| H | -2.68967 | -0.23857 | 2.67405  |
| C | -5.32534 | 1.99415  | 2.91013  |
| H | -6.10619 | 1.33148  | 3.30045  |
| H | -4.88073 | 2.52968  | 3.756    |
| H | -5.78968 | 2.73086  | 2.2503   |
| H | -2.75568 | -2.13792 | -3.96623 |
| H | -3.48781 | -3.78109 | -2.16068 |
| H | -0.86103 | -2.12429 | 2.96582  |
| H | 0.57442  | -0.61482 | 1.85907  |
| H | -0.5525  | 0.39054  | 1.23781  |

Thermal correction to Energy=0.973017

Thermal correction to Enthalpy=0.974167

Thermal correction to Gibbs Free Energy=0.781272

Sum of electronic and zero-point Energies=-2206.715825

Sum of electronic and thermal Energies=-2206.641369

Sum of electronic and thermal Enthalpies=-2206.640219

Sum of electronic and thermal Free Energies=-2206.833114

SCF Done: E(RM11L) = -2207.70058107

### TS11

Number of Negative Frequencies = 1

|    |          |          |          |
|----|----------|----------|----------|
| Ir | 0.19725  | 0.31305  | -0.41109 |
| B  | -0.01918 | 2.17425  | -1.1044  |
| H  | 1.21113  | 0.1626   | -1.63473 |
| C  | -1.80073 | -1.18293 | -2.47542 |
| C  | -3.01121 | -1.71314 | -2.96969 |
| C  | -4.04345 | -0.95214 | -0.91556 |
| C  | -2.77861 | -0.46205 | -0.51434 |
| C  | -2.61239 | 0.17789  | 0.76588  |
| C  | -3.72101 | 0.34464  | 1.62882  |
| B  | 0.68525  | -2.27536 | 0.75563  |
| N  | -1.67803 | -0.57571 | -1.30284 |
| N  | -1.35942 | 0.59383  | 1.10705  |
| O  | 1.42906  | -2.61816 | 1.8587   |
| O  | -0.66098 | -2.4898  | 0.94308  |
| O  | 2.92903  | 1.72443  | 0.05886  |
| O  | 1.97964  | 0.92407  | 1.97784  |
| O  | 1.11563  | -2.70332 | -1.88547 |
| O  | 2.89632  | -1.82712 | -0.73334 |
| C  | -5.14802 | -0.7771  | -0.01437 |
| C  | -4.99504 | -0.15585 | 1.19181  |
| H  | -6.12829 | -1.14235 | -0.30029 |
| H  | -5.85656 | -0.04189 | 1.84027  |
| C  | -4.15849 | -1.59619 | -2.18298 |
| C  | -0.84005 | -3.19913 | 2.20554  |
| C  | 0.52008  | -2.92294 | 2.95509  |
| C  | 3.47643  | -2.48434 | -1.88792 |
| C  | 2.22755  | -2.7382  | -2.82421 |
| C  | 3.7839   | 2.15587  | 1.1413   |
| C  | 3.36347  | 1.18783  | 2.30062  |
| C  | -0.59758 | 3.85833  | -2.56985 |
| B  | 1.53123  | -2.04337 | -0.73924 |
| H  | -0.88661 | -1.26721 | -3.05222 |
| B  | 1.81061  | 1.0586   | 0.58171  |
| C  | -0.38098 | 4.45965  | -1.13702 |
| O  | -0.37678 | 3.27022  | -0.3086  |
| O  | 0.02668  | 2.55602  | -2.45054 |
| C  | 0.98549  | 5.13558  | -0.97502 |
| H  | 1.15275  | 5.35505  | 0.08416  |
| H  | 1.78859  | 4.475    | -1.31392 |

|   |          |          |          |
|---|----------|----------|----------|
| H | 1.04045  | 6.07567  | -1.53509 |
| C | -1.48879 | 5.39009  | -0.65245 |
| H | -1.25183 | 5.75578  | 0.3532   |
| H | -1.58699 | 6.25891  | -1.31385 |
| H | -2.45231 | 4.87595  | -0.6045  |
| C | -2.07761 | 3.61755  | -2.8988  |
| H | -2.61867 | 4.55614  | -3.06222 |
| H | -2.14616 | 3.01674  | -3.81211 |
| H | -2.57225 | 3.0646   | -2.0928  |
| C | 0.07458  | 4.62805  | -3.70263 |
| H | -0.13006 | 4.13549  | -4.65996 |
| H | -0.31043 | 5.65297  | -3.75983 |
| H | 1.15878  | 4.66884  | -3.57094 |
| C | 5.23875  | 2.03237  | 0.6962   |
| H | 5.43892  | 2.7361   | -0.12006 |
| H | 5.92321  | 2.26608  | 1.52053  |
| H | 5.45908  | 1.02556  | 0.33273  |
| C | 3.44693  | 3.62307  | 1.43574  |
| H | 3.57918  | 4.20981  | 0.52128  |
| H | 2.40528  | 3.72642  | 1.7552   |
| H | 4.09672  | 4.04358  | 2.21159  |
| C | 4.0975   | -0.15982 | 2.25412  |
| H | 5.15242  | -0.0599  | 2.53566  |
| H | 3.61288  | -0.84814 | 2.95353  |
| H | 4.02679  | -0.60645 | 1.25794  |
| C | 3.43726  | 1.78303  | 3.70383  |
| H | 3.11614  | 1.03656  | 4.43948  |
| H | 4.46297  | 2.08133  | 3.95136  |
| H | 2.78632  | 2.65575  | 3.80575  |
| C | 4.54456  | -1.56742 | -2.47842 |
| H | 5.35059  | -1.42797 | -1.7495  |
| H | 4.97914  | -2.00309 | -3.38564 |
| H | 4.13716  | -0.58316 | -2.72031 |
| C | 1.99603  | -1.63003 | -3.85693 |
| H | 2.79372  | -1.61451 | -4.60709 |
| H | 1.04828  | -1.81416 | -4.37488 |
| H | 1.93386  | -0.6489  | -3.38084 |
| C | 2.21305  | -4.09821 | -3.51937 |
| H | 1.29971  | -4.1939  | -4.11714 |
| H | 3.07166  | -4.20094 | -4.19252 |
| H | 2.2315   | -4.92109 | -2.80056 |
| C | 4.11983  | -3.77402 | -1.36316 |
| H | 4.86293  | -3.51322 | -0.60222 |
| H | 3.37333  | -4.42222 | -0.89293 |

|   |          |          |          |
|---|----------|----------|----------|
| H | 4.62275  | -4.33407 | -2.15871 |
| C | 1.08463  | -4.11598 | 3.72146  |
| H | 2.0409   | -3.83702 | 4.17689  |
| H | 0.40334  | -4.42284 | 4.52323  |
| H | 1.26215  | -4.97208 | 3.06594  |
| C | -1.04869 | -4.67114 | 1.83507  |
| H | -1.22664 | -5.28897 | 2.72149  |
| H | -1.92028 | -4.75274 | 1.17696  |
| H | -0.18174 | -5.06937 | 1.29801  |
| C | -2.08095 | -2.64889 | 2.89936  |
| H | -2.96594 | -2.84986 | 2.28638  |
| H | -2.22476 | -3.13303 | 3.87203  |
| H | -2.01268 | -1.57097 | 3.05273  |
| C | 0.48639  | -1.68639 | 3.85754  |
| H | -0.17714 | -1.83665 | 4.71603  |
| H | 1.49615  | -1.49091 | 4.23124  |
| H | 0.16628  | -0.80397 | 3.30156  |
| H | -1.37526 | 1.57456  | 1.30177  |
| H | -1.05313 | 0.0976   | 1.91942  |
| H | -3.58675 | 0.77835  | 2.49019  |
| H | -3.00614 | -2.18799 | -3.92853 |
| H | -5.10777 | -1.97139 | -2.50389 |

Thermal correction to Energy= 0.970825

Thermal correction to Enthalpy= 0.971975

Thermal correction to Gibbs Free Energy=0.782367

Sum of electronic and zero-point Energies=-2206.714841

Sum of electronic and thermal Energies=-2206.640862

Sum of electronic and thermal Enthalpies=-2206.639712

Sum of electronic and thermal Free Energies=-2206.829319

SCF Done: E(RM11L) = -2207.69034999

**12**

**Number of Negative Frequencies = 0**

|    |          |          |          |
|----|----------|----------|----------|
| Ir | 0.12303  | 0.26036  | -0.44913 |
| B  | -0.99279 | 1.91774  | -1.15877 |
| H  | 0.84945  | 0.49195  | -1.86655 |
| C  | -1.60347 | -1.83907 | -2.20734 |
| C  | -2.66218 | -2.71764 | -2.51617 |
| C  | -3.59894 | -2.16226 | -0.35456 |
| C  | -2.49776 | -1.29665 | -0.15163 |
| C  | -2.37322 | -0.54093 | 1.06549  |
| C  | -3.35203 | -0.65683 | 2.08145  |
| B  | 1.00416  | -1.34889 | 0.82176  |
| N  | -1.51481 | -1.15179 | -1.07687 |

|   |          |          |          |   |          |          |          |
|---|----------|----------|----------|---|----------|----------|----------|
| N | -1.28427 | 0.26904  | 1.2044   | H | 4.92032  | 2.56038  | -0.41283 |
| O | 2.10453  | -1.32294 | 1.65588  | C | 2.284    | 4.70575  | 0.26932  |
| O | 0.14307  | -2.38048 | 1.17439  | H | 2.20414  | 5.05125  | -0.7668  |
| O | 2.29291  | 2.45194  | -0.5584  | H | 1.27112  | 4.59832  | 0.66852  |
| O | 1.6865   | 1.93917  | 1.58333  | H | 2.81134  | 5.47359  | 0.84688  |
| O | 1.52754  | -2.13937 | -1.86266 | C | 4.03659  | 1.58224  | 1.86778  |
| O | 3.06712  | -0.59552 | -1.15697 | H | 5.02813  | 2.0338   | 1.98693  |
| C | -4.57525 | -2.26143 | 0.69411  | H | 3.81278  | 0.99393  | 2.76313  |
| C | -4.4566  | -1.54655 | 1.85072  | H | 4.04676  | 0.89542  | 1.01647  |
| H | -5.42724 | -2.91956 | 0.56502  | C | 2.8941   | 3.5728   | 2.89546  |
| H | -5.21674 | -1.65103 | 2.61685  | H | 2.8228   | 2.97866  | 3.81404  |
| C | -3.6812  | -2.89033 | -1.57624 | H | 3.80129  | 4.18522  | 2.95976  |
| C | 0.76095  | -3.18166 | 2.21504  | H | 2.02708  | 4.23797  | 2.8575   |
| C | 1.85585  | -2.20387 | 2.78279  | C | 4.93376  | -0.98612 | -2.63568 |
| C | 3.82258  | -1.63562 | -1.81558 | H | 5.64644  | -0.4928  | -1.96506 |
| C | 2.71588  | -2.36299 | -2.66242 | H | 5.48013  | -1.73729 | -3.21822 |
| C | 3.0241   | 3.36315  | 0.29326  | H | 4.53926  | -0.23054 | -3.31974 |
| C | 2.94485  | 2.64556  | 1.68568  | C | 2.46888  | -1.70074 | -4.02373 |
| C | -2.34597 | 3.17128  | -2.55362 | H | 3.3033   | -1.86306 | -4.71445 |
| B | 1.72461  | -0.97277 | -1.10972 | H | 1.56597  | -2.13089 | -4.47121 |
| H | -0.78034 | -1.70353 | -2.89955 | H | 2.31024  | -0.62302 | -3.91302 |
| B | 1.45749  | 1.65241  | 0.22636  | C | 2.91381  | -3.86542 | -2.83252 |
| C | -2.205   | 3.89355  | -1.16944 | H | 2.09335  | -4.28363 | -3.42663 |
| O | -1.63403 | 2.84832  | -0.34006 | H | 3.85387  | -4.0788  | -3.35439 |
| O | -1.27417 | 2.193    | -2.49873 | H | 2.9256   | -4.37884 | -1.8676  |
| C | -1.19748 | 5.04888  | -1.19355 | C | 4.42703  | -2.52488 | -0.72269 |
| H | -1.0025  | 5.37382  | -0.16617 | H | 5.03725  | -1.90536 | -0.05748 |
| H | -0.24723 | 4.7296   | -1.63155 | H | 3.64146  | -2.98432 | -0.11886 |
| H | -1.57635 | 5.90739  | -1.75895 | H | 5.06192  | -3.31247 | -1.14342 |
| C | -3.51792 | 4.35235  | -0.54207 | C | 3.17219  | -2.86465 | 3.18009  |
| H | -3.3192  | 4.82754  | 0.42532  | H | 3.87332  | -2.10267 | 3.53813  |
| H | -4.02209 | 5.0858   | -1.18221 | H | 3.01748  | -3.5899  | 3.98727  |
| H | -4.19674 | 3.51304  | -0.37063 | H | 3.63846  | -3.37554 | 2.33439  |
| C | -3.65625 | 2.38378  | -2.691   | C | 1.34051  | -4.42486 | 1.53187  |
| H | -4.52167 | 3.0458   | -2.80559 | H | 1.80087  | -5.10858 | 2.25304  |
| H | -3.59333 | 1.74279  | -3.57695 | H | 0.53251  | -4.95726 | 1.01858  |
| H | -3.82085 | 1.73935  | -1.82086 | H | 2.08767  | -4.15022 | 0.78219  |
| C | -2.14111 | 4.0642   | -3.77345 | C | -0.31685 | -3.5932  | 3.21483  |
| H | -2.25245 | 3.47337  | -4.6897  | H | -1.05299 | -4.23474 | 2.7178   |
| H | -2.88578 | 4.86857  | -3.79707 | H | 0.11901  | -4.1573  | 4.04758  |
| H | -1.14398 | 4.51139  | -3.78143 | H | -0.84606 | -2.72778 | 3.62019  |
| C | 4.43469  | 3.52848  | -0.26656 | C | 1.34441  | -1.31952 | 3.92605  |
| H | 4.3905   | 4.03274  | -1.23874 | H | 1.18614  | -1.89505 | 4.84453  |
| H | 5.05558  | 4.13708  | 0.40187  | H | 2.0846   | -0.5384  | 4.12777  |

|                                                          |          |          |          |   |          |          |          |
|----------------------------------------------------------|----------|----------|----------|---|----------|----------|----------|
| H                                                        | 0.40651  | -0.82687 | 3.6534   | C | 1.90532  | 4.09323  | -0.30482 |
| H                                                        | -2.64477 | -3.22656 | -3.45723 | C | 1.98574  | 3.70933  | 1.21367  |
| H                                                        | -4.50429 | -3.55251 | -1.74634 | C | -3.35181 | 1.43937  | -2.60392 |
| H                                                        | -3.23266 | -0.09445 | 2.98388  | B | -1.33215 | 1.20305  | -1.52686 |
| H                                                        | -1.04529 | 0.34314  | 2.17259  | H | 0.00265  | -2.55666 | -2.22555 |
| H                                                        | -1.49595 | 1.17706  | 0.84287  | B | 1.10914  | 1.94083  | -0.00903 |
| Thermal correction to Energy=0.971624                    |          |          |          | C | -2.84533 | 2.8423   | -2.11773 |
| Thermal correction to Enthalpy=0.972774                  |          |          |          | O | -1.77718 | 2.47496  | -1.20139 |
| Thermal correction to Gibbs Free Energy=0.781631         |          |          |          | O | -2.14829 | 0.62885  | -2.49452 |
| Sum of electronic and zero-point Energies=-2206.727896   |          |          |          | C | -2.20922 | 3.67681  | -3.23458 |
| Sum of electronic and thermal Energies=-2206.653265      |          |          |          | H | -2.95953 | 4.04633  | -3.94206 |
| Sum of electronic and thermal Enthalpies=-2206.652115    |          |          |          | H | -1.70079 | 4.53758  | -2.78848 |
| Sum of electronic and thermal Free Energies=-2206.843258 |          |          |          | H | -1.46339 | 3.09462  | -3.78561 |
| SCF Done: E(RM11L) = -2207.69875113                      |          |          |          | C | -3.87297 | 3.67288  | -1.35639 |

### TS13

#### Number of Negative Frequencies = 1

|    |          |          |          |   |          |          |          |
|----|----------|----------|----------|---|----------|----------|----------|
| Ir | 0.18502  | 0.16523  | -0.40181 | C | -4.39044 | 0.81574  | -1.6624  |
| H  | 0.41689  | 0.60245  | -1.95052 | H | -5.35287 | 1.33545  | -1.7194  |
| B  | 1.97063  | -0.63032 | -1.15043 | H | -4.54643 | -0.23068 | -1.94536 |
| C  | -0.86003 | -2.68226 | -1.58274 | H | -4.04261 | 0.83487  | -0.62474 |
| C  | -1.68743 | -3.81605 | -1.71164 | C | -3.84944 | 1.39225  | -4.04411 |
| C  | -2.98449 | -2.93326 | 0.12818  | H | -4.16641 | 0.37328  | -4.29313 |
| C  | -2.09326 | -1.8328  | 0.1688   | H | -4.71012 | 2.05754  | -4.17966 |
| C  | -2.28587 | -0.77403 | 1.12394  | H | -3.06819 | 1.684    | -4.75035 |
| C  | -3.3671  | -0.82069 | 2.038    | C | 2.8178   | -2.42207 | -3.58321 |
| B  | 1.27401  | -0.76173 | 1.22074  | H | 3.63571  | -2.63845 | -4.27878 |
| N  | -1.04119 | -1.72538 | -0.68255 | H | 2.1194   | -3.26623 | -3.60453 |
| N  | -1.40857 | 0.26924  | 1.10712  | H | 2.28489  | -1.53219 | -3.93448 |
| O  | 2.5804   | -0.57574 | 1.66307  | C | 4.87861  | -0.40445 | -3.18067 |
| O  | 0.62172  | -1.67842 | 2.04699  | H | 5.39832  | 0.53243  | -2.95077 |
| O  | 1.69695  | 2.80926  | -0.9334  | H | 5.6286   | -1.13944 | -3.49598 |
| O  | 1.15156  | 2.52983  | 1.26743  | H | 4.20161  | -0.21495 | -4.01766 |
| O  | 2.15417  | -2.00934 | -1.31852 | C | 5.06092  | -0.92727 | -0.73281 |
| O  | 3.07275  | 0.05565  | -1.643   | H | 5.44899  | 0.08213  | -0.55696 |
| C  | -4.07108 | -2.954   | 1.06712  | H | 4.51598  | -1.23303 | 0.16294  |
| C  | -4.2512  | -1.95148 | 1.97493  | H | 5.91105  | -1.5999  | -0.89284 |
| H  | -4.76783 | -3.78516 | 1.05333  | C | 4.03145  | -3.48922 | -1.66487 |
| H  | -5.08625 | -2.00655 | 2.66448  | H | 3.38407  | -4.35988 | -1.81954 |
| C  | -2.76961 | -3.95485 | -0.84025 | H | 4.96092  | -3.65355 | -2.22243 |
| C  | 1.60423  | -2.30983 | 2.90647  | H | 4.26942  | -3.43296 | -0.59969 |
| C  | 2.73397  | -1.22584 | 2.95271  | C | 2.49455  | -0.15371 | 4.02243  |
| C  | 4.12474  | -0.89179 | -1.94625 | H | 2.64521  | -0.54762 | 5.03365  |
| C  | 3.32223  | -2.22764 | -2.14763 | H | 3.19838  | 0.66976  | 3.86337  |

|                                                          |          |          |          |    |          |          |          |
|----------------------------------------------------------|----------|----------|----------|----|----------|----------|----------|
| H                                                        | 1.48029  | 0.25155  | 3.94899  |    |          |          |          |
| C                                                        | 4.15261  | -1.77397 | 3.06743  | Ir | 0.05169  | -0.23771 | -0.01205 |
| H                                                        | 4.87224  | -0.94779 | 3.05936  | C  | -3.84861 | -1.16192 | -2.0588  |
| H                                                        | 4.27865  | -2.32503 | 4.0069   | C  | -2.60247 | -1.14884 | -1.46827 |
| H                                                        | 4.39761  | -2.4426  | 2.2388   | C  | -2.07927 | -2.34232 | -0.89353 |
| C                                                        | 2.03903  | -3.6003  | 2.20081  | C  | -2.82889 | -3.55422 | -0.9954  |
| H                                                        | 2.75828  | -4.17252 | 2.79694  | C  | -1.04215 | -4.65989 | 0.19227  |
| H                                                        | 1.15615  | -4.22661 | 2.0319   | C  | -0.39108 | -3.41063 | 0.28921  |
| H                                                        | 2.48085  | -3.37377 | 1.22544  | H  | 0.55719  | -3.31668 | 0.80763  |
| C                                                        | 0.95338  | -2.62671 | 4.24868  | N  | -1.80329 | 0.05364  | -1.37565 |
| H                                                        | 0.16893  | -3.37981 | 4.11188  | N  | -0.88099 | -2.29213 | -0.22522 |
| H                                                        | 1.68905  | -3.02906 | 4.95502  | O  | 2.41359  | 0.36262  | -1.87874 |
| H                                                        | 0.49319  | -1.73949 | 4.69158  | O  | 1.38052  | -1.64377 | -2.27333 |
| C                                                        | 1.4255   | 4.75139  | 2.17789  | O  | 1.52892  | -0.31138 | 2.66004  |
| H                                                        | 1.97794  | 5.69535  | 2.10172  | O  | 2.84364  | -1.13147 | 0.97912  |
| H                                                        | 0.36832  | 4.95023  | 1.98129  | O  | 0.09789  | 2.69672  | -0.84291 |
| H                                                        | 1.51467  | 4.38971  | 3.20893  | O  | 1.60434  | 2.32674  | 0.83719  |
| C                                                        | 3.39242  | 3.28222  | 1.65161  | C  | -4.60727 | -2.35509 | -2.127   |
| H                                                        | 4.08379  | 4.13154  | 1.69104  | C  | -4.10361 | -3.53217 | -1.61979 |
| H                                                        | 3.33307  | 2.83757  | 2.65075  | H  | -5.58753 | -2.33466 | -2.59397 |
| H                                                        | 3.79773  | 2.52625  | 0.97195  | H  | -4.67276 | -4.45588 | -1.68132 |
| C                                                        | 3.17163  | 4.72497  | -0.87618 | C  | -2.26312 | -4.72942 | -0.43774 |
| H                                                        | 3.02631  | 4.94851  | -1.93924 | C  | 2.61488  | -1.66958 | -3.03071 |
| H                                                        | 3.4084   | 5.66425  | -0.36215 | C  | 2.9777   | -0.1453  | -3.10824 |
| H                                                        | 4.02911  | 4.05277  | -0.78949 | C  | 1.56164  | 3.75608  | 0.64635  |
| C                                                        | 0.68429  | 4.96132  | -0.63887 | C  | 0.93818  | 3.87843  | -0.78515 |
| H                                                        | 0.59683  | 5.03983  | -1.72773 | C  | 2.71735  | -0.83022 | 3.29573  |
| H                                                        | -0.23301 | 4.49673  | -0.26692 | C  | 3.72742  | -0.90668 | 2.09851  |
| H                                                        | 0.77469  | 5.97293  | -0.22702 | B  | 1.38822  | -0.49316 | -1.4625  |
| H                                                        | -1.45565 | -4.53246 | -2.47187 | B  | 1.58514  | -0.57171 | 1.27419  |
| H                                                        | -3.42958 | -4.7959  | -0.88452 | B  | 0.64865  | 1.71091  | 0.01465  |
| H                                                        | -3.49366 | -0.01969 | 2.73606  | C  | 4.73567  | -2.0496  | 2.17497  |
| H                                                        | -1.32603 | 0.65024  | 2.02801  | H  | 5.39883  | -2.02131 | 1.30275  |
| H                                                        | -1.74246 | 0.97551  | 0.48287  | H  | 5.35801  | -1.96248 | 3.07353  |
| Thermal correction to Energy=0.969581                    |          |          |          | H  | 4.2404   | -3.02421 | 2.18768  |
| Thermal correction to Enthalpy=0.970731                  |          |          |          | C  | 2.36934  | -2.21048 | 3.87028  |
| Thermal correction to Gibbs Free Energy=0.781817         |          |          |          | H  | 3.21554  | -2.65816 | 4.40333  |
| Sum of electronic and zero-point Energies=-2206.724281   |          |          |          | H  | 1.54039  | -2.10798 | 4.57905  |
| Sum of electronic and thermal Energies=-2206.650061      |          |          |          | H  | 2.05491  | -2.89614 | 3.07629  |
| Sum of electronic and thermal Enthalpies=-2206.648911    |          |          |          | C  | 3.12294  | 0.11606  | 4.42334  |
| Sum of electronic and thermal Free Energies=-2206.837826 |          |          |          | H  | 2.35648  | 0.10867  | 5.20711  |
| SCF Done: E(RM11L) = -2207.69141802                      |          |          |          | H  | 4.07261  | -0.19412 | 4.87553  |
| <b>4d</b>                                                |          |          |          | H  | 3.22456  | 1.14289  | 4.06316  |
| <b>Number of Negative Frequencies = 0</b>                |          |          |          | C  | 4.44899  | 0.4234   | 1.83764  |

|   |          |          |          |                                                          |          |          |          |
|---|----------|----------|----------|----------------------------------------------------------|----------|----------|----------|
| H | 5.17762  | 0.65696  | 2.62246  | H                                                        | -1.01556 | 0.63361  | 2.74039  |
| H | 4.98209  | 0.35177  | 0.88308  | H                                                        | -1.40428 | 0.29183  | -2.28365 |
| H | 3.72571  | 1.23986  | 1.75483  | H                                                        | -2.3895  | 0.84061  | -1.10041 |
| C | 3.6268   | -2.48271 | -2.21219 | H                                                        | -4.24851 | -0.24082 | -2.47259 |
| H | 3.78461  | -2.02368 | -1.23172 | H                                                        | -2.80698 | -5.66753 | -0.51045 |
| H | 3.22256  | -3.48879 | -2.05119 | H                                                        | -0.57853 | -5.53677 | 0.63229  |
| H | 4.58768  | -2.57982 | -2.73004 | C                                                        | -5.13422 | -0.72644 | 0.92384  |
| C | 2.35583  | -2.34225 | -4.37517 | H                                                        | -5.74497 | -1.60491 | 0.93697  |
| H | 3.24781  | -2.30085 | -5.01146 | N                                                        | -5.87958 | 0.39734  | 1.50904  |
| H | 2.10063  | -3.39674 | -4.21988 | C                                                        | -7.10951 | 0.62471  | 0.73671  |
| H | 1.52589  | -1.87119 | -4.90865 | C                                                        | -7.75966 | 1.94704  | 1.18433  |
| C | 4.47177  | 0.16449  | -3.12578 | H                                                        | -7.83807 | 2.60757  | 0.34621  |
| H | 4.95587  | -0.28249 | -4.00236 | H                                                        | -8.73583 | 1.74998  | 1.57569  |
| H | 4.62508  | 1.24878  | -3.17076 | H                                                        | -7.15681 | 2.40232  | 1.94208  |
| H | 4.96618  | -0.20676 | -2.22468 | C                                                        | -6.76706 | 0.7028   | -0.7627  |
| C | 2.27565  | 0.57928  | -4.26503 | H                                                        | -7.32278 | -0.04089 | -1.29467 |
| H | 2.41053  | 1.65871  | -4.14429 | H                                                        | -7.02068 | 1.67281  | -1.13642 |
| H | 2.68359  | 0.28735  | -5.23889 | H                                                        | -5.71979 | 0.53075  | -0.8988  |
| H | 1.20011  | 0.37142  | -4.26002 | C                                                        | -8.0903  | -0.53751 | 0.97941  |
| C | 2.97547  | 4.31411  | 0.78641  | H                                                        | -8.13643 | -0.7525  | 2.02658  |
| H | 2.99876  | 5.38727  | 0.56185  | H                                                        | -9.06302 | -0.2625  | 0.62858  |
| H | 3.32889  | 4.17704  | 1.81482  | H                                                        | -7.7529  | -1.40503 | 0.45172  |
| H | 3.674    | 3.80185  | 0.12004  | H                                                        | -3.08156 | 1.02579  | 1.44164  |
| C | 0.65594  | 4.33     | 1.74493  | Thermal correction to Energy=1.019746                    |          |          |          |
| H | 1.03762  | 4.01149  | 2.72113  | Thermal correction to Enthalpy=1.020896                  |          |          |          |
| H | 0.62779  | 5.42531  | 1.72748  | Thermal correction to Gibbs Free Energy=0.818436         |          |          |          |
| H | -0.36667 | 3.9512   | 1.64189  | Sum of electronic and zero-point Energies=-2277.788814   |          |          |          |
| C | 0.09412  | 5.12865  | -1.01587 | Sum of electronic and thermal Energies=-2277.710264      |          |          |          |
| H | 0.71984  | 6.02759  | -0.95939 | Sum of electronic and thermal Enthalpies=-2277.709114    |          |          |          |
| H | -0.35522 | 5.09405  | -2.01507 | Sum of electronic and thermal Free Energies=-2277.911573 |          |          |          |
| H | -0.71312 | 5.22749  | -0.28811 | SCF Done: E(RM11L) = -2278.8071403                       |          |          |          |
| C | 1.98166  | 3.74531  | -1.90226 | <b>TS5d</b>                                              |          |          |          |
| H | 2.5742   | 2.8377   | -1.76665 | <b>Number of Negative Frequencies = 1</b>                |          |          |          |
| H | 1.46081  | 3.66515  | -2.86303 | B                                                        | -1.34498 | 0.25388  | 1.3179   |
| H | 2.64524  | 4.61636  | -1.94523 | B                                                        | -1.73797 | -0.69287 | -1.31641 |
| C | -1.50567 | -1.40883 | 3.20283  | B                                                        | -0.35507 | 1.76897  | -0.41155 |
| C | -2.43347 | -2.43919 | 3.05206  | C                                                        | 3.47136  | -1.28259 | 2.34076  |
| C | -3.61031 | -2.21947 | 2.32129  | C                                                        | 2.23245  | -1.16003 | 1.74487  |
| C | -3.85588 | -0.97767 | 1.74502  | C                                                        | 1.41159  | -2.3135  | 1.58599  |
| C | -2.92659 | 0.06816  | 1.89312  | C                                                        | 1.84736  | -3.56342 | 2.12067  |
| C | -1.75121 | -0.15852 | 2.6283   | C                                                        | 0.97688  | -4.67626 | 1.98829  |
| H | -0.57432 | -1.56884 | 3.73424  | C                                                        | -0.22486 | -4.52351 | 1.33802  |
| H | -2.24246 | -3.41441 | 3.49244  | C                                                        | -0.55279 | -3.26777 | 0.77931  |
| H | -4.33055 | -3.02382 | 2.19735  |                                                          |          |          |          |

|    |          |          |          |   |          |          |          |
|----|----------|----------|----------|---|----------|----------|----------|
| H  | -1.46044 | -3.11787 | 0.20519  | H | -1.60401 | -1.54121 | 3.57642  |
| C  | -3.16573 | 0.57179  | 2.70388  | C | -2.33612 | 4.73519  | -0.26005 |
| C  | -1.84608 | 0.62501  | 3.55085  | H | -3.24713 | 4.55837  | -0.84256 |
| C  | -3.62665 | -0.46464 | -2.61562 | H | -2.55661 | 4.50597  | 0.78476  |
| C  | -3.49706 | -1.9577  | -2.15683 | H | -2.08409 | 5.79929  | -0.33789 |
| C  | 0.15395  | 3.99378  | -0.02994 | C | -1.04989 | 4.09363  | -2.31478 |
| C  | -1.20186 | 3.87358  | -0.80382 | H | -1.97331 | 3.78002  | -2.81252 |
| Ir | -0.0448  | -0.26442 | -0.26579 | H | -0.86509 | 5.14535  | -2.55818 |
| N  | 1.71432  | 0.08903  | 1.2658   | H | -0.2292  | 3.49045  | -2.71701 |
| N  | 0.23294  | -2.20601 | 0.88855  | C | -0.02884 | 4.20354  | 1.47742  |
| O  | -2.701   | 0.00725  | 1.44857  | H | 0.94294  | 4.09164  | 1.97137  |
| O  | -0.83784 | 0.7854   | 2.51406  | H | -0.41539 | 5.20273  | 1.70579  |
| O  | -2.29543 | 0.04413  | -2.36073 | H | -0.7038  | 3.45233  | 1.89751  |
| O  | -2.49273 | -1.8584  | -1.11633 | C | 1.11316  | 5.03542  | -0.59671 |
| O  | 0.70975  | 2.65998  | -0.20445 | H | 0.6352   | 6.02207  | -0.60579 |
| O  | -1.53241 | 2.4766   | -0.61333 | H | 2.01327  | 5.10378  | 0.02236  |
| H  | 0.44792  | 0.13935  | -1.77511 | H | 1.42081  | 4.78872  | -1.61562 |
| C  | 1.36924  | -1.1956  | -1.71488 | C | -2.93338 | -2.87662 | -3.24777 |
| C  | 0.93686  | -2.41583 | -2.27217 | H | -2.66284 | -3.8389  | -2.79903 |
| C  | 1.82602  | -3.30411 | -2.87824 | H | -3.66592 | -3.0633  | -4.04083 |
| H  | 1.4587   | -4.24461 | -3.28371 | H | -2.03364 | -2.44688 | -3.69904 |
| C  | 3.1859   | -2.98255 | -2.9655  | C | -4.76189 | -2.5646  | -1.55715 |
| H  | 3.88524  | -3.66698 | -3.43918 | H | -5.57917 | -2.56327 | -2.28773 |
| C  | 3.63019  | -1.76508 | -2.46203 | H | -4.57293 | -3.60356 | -1.26311 |
| C  | 2.73706  | -0.86094 | -1.85473 | H | -5.08391 | -2.0165  | -0.66843 |
| C  | 3.92317  | -2.53211 | 2.82682  | C | -3.96024 | -0.26745 | -4.09048 |
| C  | 3.12041  | -3.64789 | 2.74246  | H | -4.93045 | -0.71592 | -4.33465 |
| H  | 3.45015  | -4.60559 | 3.13559  | H | -4.01527 | 0.80339  | -4.31661 |
| H  | 4.90459  | -2.597   | 3.28737  | H | -3.19881 | -0.70839 | -4.7392  |
| C  | -4.25831 | -0.33034 | 3.26806  | C | -4.58797 | 0.34667  | -1.73582 |
| H  | -4.57318 | 0.01235  | 4.26055  | H | -4.48528 | 1.40752  | -1.9867  |
| H  | -5.13291 | -0.30769 | 2.60851  | H | -5.63202 | 0.05356  | -1.89346 |
| H  | -3.92392 | -1.36813 | 3.34583  | H | -4.33355 | 0.22621  | -0.67798 |
| C  | -3.72881 | 1.95999  | 2.385    | H | -0.11109 | -2.69096 | -2.1951  |
| H  | -4.52547 | 1.8609   | 1.64045  | H | 1.27742  | -5.63666 | 2.39879  |
| H  | -4.14316 | 2.44535  | 3.27524  | H | -0.91596 | -5.35165 | 1.21927  |
| H  | -2.95338 | 2.5999   | 1.95659  | H | 4.09986  | -0.40332 | 2.44399  |
| C  | -1.7444  | 1.79425  | 4.52328  | H | 2.45954  | 0.72067  | 0.98068  |
| H  | -2.54324 | 1.74592  | 5.27223  | H | 1.16699  | 0.55638  | 1.99365  |
| H  | -0.78395 | 1.75693  | 5.04968  | C | 5.11291  | -1.36443 | -2.57435 |
| H  | -1.80846 | 2.75483  | 4.00653  | H | 5.66467  | -2.16211 | -3.0262  |
| C  | -1.53561 | -0.69449 | 4.26713  | N | 5.23247  | -0.15555 | -3.40212 |
| H  | -0.51207 | -0.65736 | 4.65591  | C | 6.20016  | 0.76503  | -2.78809 |
| H  | -2.21702 | -0.8704  | 5.10618  | C | 6.22772  | 0.53979  | -1.2649  |

|                                                          |         |          |          |   |          |          |          |
|----------------------------------------------------------|---------|----------|----------|---|----------|----------|----------|
| H                                                        | 5.24818 | 0.69565  | -0.86353 | O | 3.14829  | 0.43386  | 0.59067  |
| H                                                        | 6.54272 | -0.46166 | -1.05809 | O | 1.66561  | 0.7572   | 2.29763  |
| H                                                        | 6.91141 | 1.22888  | -0.81477 | O | 2.05977  | -2.2341  | -1.9611  |
| C                                                        | 7.60083 | 0.50147  | -3.37141 | O | 2.3733   | -0.04684 | -2.5275  |
| H                                                        | 7.54522 | 0.48662  | -4.43986 | O | 0.02667  | -2.11787 | 2.1237   |
| H                                                        | 8.26872 | 1.27716  | -3.05976 | O | 2.06282  | -2.50268 | 1.15805  |
| H                                                        | 7.96174 | -0.44251 | -3.01989 | H | -0.07076 | -1.90284 | -0.37389 |
| C                                                        | 5.78569 | 2.21825  | -3.08469 | C | -1.183   | -0.18846 | -1.90551 |
| H                                                        | 6.64874 | 2.84971  | -3.04869 | C | -0.91847 | 0.39058  | -3.16715 |
| H                                                        | 5.34492 | 2.2718   | -4.05822 | C | -1.91558 | 0.55245  | -4.13653 |
| H                                                        | 5.07543 | 2.54293  | -2.35325 | H | -1.6694  | 0.99906  | -5.09846 |
| H                                                        | 3.10552 | 0.08633  | -1.52034 | C | -3.22424 | 0.14362  | -3.87531 |
| Thermal correction to Energy=1.014855                    |         |          |          | H | -4.006   | 0.27479  | -4.62137 |
| Thermal correction to Enthalpy=1.016005                  |         |          |          | C | -3.52918 | -0.43581 | -2.63407 |
| Thermal correction to Gibbs Free Energy=0.817016         |         |          |          | C | -2.50584 | -0.60156 | -1.68266 |
| Sum of electronic and zero-point Energies=-2277.742607   |         |          |          | C | -2.40826 | 4.02016  | 1.67322  |
| Sum of electronic and thermal Energies=-2277.664573      |         |          |          | C | -1.52017 | 4.68702  | 0.88054  |
| Sum of electronic and thermal Enthalpies=-2277.663423    |         |          |          | H | -1.55881 | 5.76954  | 0.83806  |
| Sum of electronic and thermal Free Energies=-2277.862411 |         |          |          | H | -3.13583 | 4.58646  | 2.24367  |
| SCF Done: E(RM11L) = -2278.7550052                       |         |          |          | C | 4.91289  | 1.99851  | 1.11455  |

## 6d

### Number of Negative Frequencies = 0

|    |          |          |          |   |         |          |         |
|----|----------|----------|----------|---|---------|----------|---------|
| B  | 1.85618  | 0.21129  | 1.03463  | H | 5.3022  | -0.6707  | 1.55287 |
| B  | 1.67566  | -0.92244 | -1.68544 | H | 5.33478 | 0.13606  | 3.13555 |
| B  | 0.9091   | -1.72867 | 1.11274  | H | 3.98421 | -0.94242 | 2.69611 |
| C  | -2.215   | -0.14394 | 1.80843  | C | 3.09882 | 1.47518  | 4.11361 |
| H  | -2.09494 | -1.21992 | 1.81603  | H | 4.00236 | 2.03497  | 4.3812  |
| C  | -3.22597 | 0.46424  | 2.58246  | H | 2.25964 | 1.8959   | 4.67873 |
| C  | -3.32447 | 1.85562  | 2.57312  | H | 3.22804 | 0.43659  | 4.42669 |
| C  | -2.40456 | 2.58785  | 1.76716  | C | 2.44156 | 3.02661  | 2.25823 |
| C  | -1.44002 | 1.87443  | 1.01487  | H | 1.53527 | 3.30696  | 2.80498 |
| C  | -0.51101 | 2.57782  | 0.16917  | H | 3.23788 | 3.72897  | 2.52718 |
| C  | -0.53944 | 3.99164  | 0.09519  | H | 2.23753 | 3.12623  | 1.18913 |
| C  | 3.92957  | 0.9817   | 1.6852   | C | 3.12431 | -4.00888 | 2.72568 |
| C  | 2.81837  | 1.58526  | 2.61878  | H | 3.84824 | -4.35201 | 1.9782  |
| C  | 3.26831  | -2.19706 | -2.75663 | H | 3.56532 | -3.16143 | 3.25535 |
| C  | 3.13358  | -0.818   | -3.49054 | H | 2.9627  | -4.82302 | 3.44159 |
| C  | 0.70259  | -3.06468 | 2.98794  | C | 1.33075 | -4.78316 | 1.15433 |
| C  | 1.81783  | -3.62858 | 2.0381   | H | 2.08509 | -4.98228 | 0.38626 |
| Ir | 0.26906  | -0.33053 | -0.32906 | H | 1.17363 | -5.69972 | 1.73317 |
| N  | -1.35026 | 0.52105  | 1.05558  | H | 0.39616 | -4.52354 | 0.64649 |
| N  | 0.38644  | 1.84295  | -0.54829 | C | 1.26294 | -2.27275 | 4.17437 |



|   |          |          |          |
|---|----------|----------|----------|
| H | 0.43838  | -1.75668 | 4.67801  |
| H | 1.75765  | -2.92582 | 4.90158  |
| H | 1.97027  | -1.51209 | 3.83393  |
| C | -0.31619 | -4.09277 | 3.46964  |
| H | 0.17093  | -4.87789 | 4.05954  |
| H | -1.06217 | -3.60356 | 4.10622  |
| H | -0.8428  | -4.55957 | 2.63331  |
| C | 2.29713  | -0.8951  | -4.77321 |
| H | 2.07834  | 0.12125  | -5.1186  |
| H | 2.82957  | -1.42101 | -5.57332 |
| H | 1.34472  | -1.40253 | -4.59178 |
| C | 4.4489   | -0.09398 | -3.75996 |
| H | 5.09746  | -0.68958 | -4.4129  |
| H | 4.25135  | 0.86149  | -4.26004 |
| H | 4.98521  | 0.11672  | -2.83147 |
| C | 3.29533  | -3.41597 | -3.67303 |
| H | 4.1571   | -3.37838 | -4.34999 |
| H | 3.3767   | -4.32852 | -3.07169 |
| H | 2.38405  | -3.48924 | -4.27238 |
| C | 4.4491   | -2.23822 | -1.77612 |
| H | 4.37121  | -3.14548 | -1.16865 |
| H | 5.41197  | -2.25262 | -2.2992  |
| H | 4.41791  | -1.37944 | -1.09835 |
| H | 0.0928   | 0.71692  | -3.39802 |
| C | -4.9204  | -0.82792 | -2.33713 |
| H | -5.6287  | -0.67348 | -3.16267 |
| N | -5.26996 | -1.29243 | -1.20097 |
| C | -6.66041 | -1.66121 | -0.89641 |
| C | -7.05954 | -0.81816 | 0.33112  |
| H | -6.3423  | -0.96489 | 1.14654  |
| H | -7.0722  | 0.24906  | 0.07887  |
| H | -8.05714 | -1.10058 | 0.68824  |
| C | -6.63094 | -3.15266 | -0.50925 |
| H | -5.91134 | -3.32682 | 0.29872  |
| H | -7.62003 | -3.48547 | -0.17223 |
| H | -6.33431 | -3.76851 | -1.36671 |
| C | -7.67961 | -1.4409  | -2.02766 |
| H | -8.67728 | -1.74211 | -1.68901 |
| H | -7.73355 | -0.38689 | -2.32508 |
| H | -7.43673 | -2.03703 | -2.91539 |
| H | -2.78012 | -1.05699 | -0.73597 |
| H | -4.06271 | 2.37705  | 3.14584  |
| H | -3.87792 | -0.16424 | 3.15242  |
| H | 0.14857  | 4.52533  | -0.52668 |

|   |         |         |          |
|---|---------|---------|----------|
| H | 1.22061 | 1.71847 | -0.01101 |
| H | 0.60578 | 2.32197 | -1.39825 |

Thermal correction to Energy=1.017394  
Thermal correction to Enthalpy=1.018544  
Thermal correction to Gibbs Free Energy=0.820168  
Sum of electronic and zero-point Energies=-2277.756575  
Sum of electronic and thermal Energies=-2277.678709  
Sum of electronic and thermal Enthalpies=-2277.677559  
Sum of electronic and thermal Free Energies=-2277.875935  
SCF Done: E(RM11L) = -2278.77377452

### 7d

#### Number of Negative Frequencies = 0

|    |          |          |          |
|----|----------|----------|----------|
| Ir | 0.27785  | -0.08741 | -0.68886 |
| B  | -1.55185 | 0.84677  | -1.11304 |
| B  | 0.1519   | 1.748    | 0.29693  |
| O  | -1.91228 | 1.22685  | -2.40012 |
| O  | -2.60844 | 1.07871  | -0.23215 |
| C  | 1.30582  | -3.16029 | 2.41067  |
| C  | 2.73934  | -3.7488  | 0.06712  |
| N  | 1.77247  | -1.74358 | -0.9298  |
| N  | 0.46384  | -1.06367 | 1.39685  |
| O  | 0.23078  | 1.79013  | 1.69631  |
| O  | -0.13253 | 3.01392  | -0.20529 |
| C  | 1.91832  | -2.58423 | 0.14121  |
| C  | 1.2234   | -2.29009 | 1.34437  |
| O  | 2.94466  | 0.3718   | 0.71363  |
| O  | 2.82616  | 1.86791  | -1.00598 |
| C  | 2.80906  | -4.61794 | 1.18669  |
| C  | 2.09303  | -4.33382 | 2.32849  |
| H  | 3.4272   | -5.5089  | 1.12153  |
| H  | 2.13598  | -5.00338 | 3.18235  |
| C  | 3.44108  | -3.98394 | -1.14339 |
| C  | -0.05207 | 3.98075  | 0.87404  |
| C  | -0.24227 | 3.08381  | 2.15407  |
| C  | 4.24434  | 1.76176  | -0.69098 |
| C  | 4.24472  | 1.01609  | 0.70245  |
| C  | -3.19373 | 1.90331  | -2.35727 |
| C  | -3.80037 | 1.39029  | -1.00065 |
| H  | 0.427    | 0.49964  | -2.14582 |
| C  | 3.29583  | -3.10719 | -2.1936  |
| C  | -2.90068 | 3.40682  | -2.36054 |
| H  | -2.27169 | 3.67306  | -1.50884 |
| H  | -2.35171 | 3.66015  | -3.27418 |

|   |          |          |          |                                                          |          |          |          |
|---|----------|----------|----------|----------------------------------------------------------|----------|----------|----------|
| H | -3.81982 | 4.00224  | -2.33596 | H                                                        | 5.21206  | -0.84075 | 0.08335  |
| C | -3.9902  | 1.51539  | -3.59974 | C                                                        | 2.43493  | -1.9971  | -2.04784 |
| H | -4.99791 | 1.94574  | -3.56609 | H                                                        | 2.28167  | -1.29947 | -2.8632  |
| H | -3.48779 | 1.89897  | -4.49459 | B                                                        | 2.13319  | 0.9284   | -0.26847 |
| H | -4.07573 | 0.43063  | -3.70106 | C                                                        | -2.02769 | -2.35776 | -0.57649 |
| C | -4.59636 | 0.08778  | -1.14485 | C                                                        | -1.0897  | -1.6423  | -1.36938 |
| H | -4.82599 | -0.3048  | -0.14861 | C                                                        | -0.90009 | -2.12561 | -2.68294 |
| H | -5.54017 | 0.25144  | -1.67564 | C                                                        | -1.55017 | -3.25698 | -3.17881 |
| H | -4.01933 | -0.67347 | -1.67648 | C                                                        | -2.44319 | -3.9632  | -2.36395 |
| C | -4.62114 | 2.4185   | -0.22859 | C                                                        | -2.67925 | -3.50516 | -1.07355 |
| H | -5.49695 | 2.73043  | -0.80928 | H                                                        | -0.21543 | -1.59741 | -3.3429  |
| H | -4.97739 | 1.97868  | 0.70968  | H                                                        | -1.36728 | -3.58357 | -4.20098 |
| H | -4.03284 | 3.3058   | 0.01683  | H                                                        | -2.95947 | -4.84349 | -2.73959 |
| C | -1.12994 | 5.04266  | 0.6802   | H                                                        | 3.81597  | -3.25419 | -3.13416 |
| H | -1.11744 | 5.75537  | 1.51306  | H                                                        | 4.0817   | -4.85779 | -1.22505 |
| H | -0.94166 | 5.59903  | -0.24438 | H                                                        | 0.76653  | -2.93267 | 3.32621  |
| H | -2.12774 | 4.6041   | 0.61494  | H                                                        | 0.98638  | -0.34697 | 1.90471  |
| C | 1.33493  | 4.62417  | 0.77833  | H                                                        | -0.40201 | -1.20975 | 1.91206  |
| H | 2.11723  | 3.87005  | 0.87992  | C                                                        | -3.68635 | -4.22596 | -0.15824 |
| H | 1.44553  | 5.08206  | -0.21    | H                                                        | -4.44649 | -3.53774 | 0.14744  |
| H | 1.48131  | 5.39902  | 1.53832  | N                                                        | -2.98796 | -4.74304 | 1.02741  |
| C | 0.59137  | 3.50714  | 3.35929  | C                                                        | -3.96007 | -4.97934 | 2.10448  |
| H | 0.30936  | 4.51276  | 3.69187  | C                                                        | -3.28292 | -4.74512 | 3.46764  |
| H | 0.41684  | 2.81509  | 4.19084  | H                                                        | -3.60116 | -3.80488 | 3.86711  |
| H | 1.66062  | 3.50059  | 3.13456  | H                                                        | -3.55671 | -5.52994 | 4.14143  |
| C | -1.70882 | 2.90202  | 2.5596   | H                                                        | -2.22041 | -4.7378  | 3.34151  |
| H | -2.14404 | 3.83397  | 2.9361   | C                                                        | -4.46945 | -6.43059 | 2.02694  |
| H | -2.29878 | 2.53953  | 1.7148   | H                                                        | -3.63571 | -7.09842 | 1.96535  |
| H | -1.76587 | 2.15385  | 3.35727  | H                                                        | -5.04214 | -6.65484 | 2.90252  |
| C | 4.87877  | 0.94312  | -1.82142 | H                                                        | -5.08442 | -6.54685 | 1.15907  |
| H | 4.68982  | 1.44779  | -2.77471 | C                                                        | -5.14624 | -4.00987 | 1.9472   |
| H | 5.96183  | 0.84657  | -1.69202 | H                                                        | -5.57756 | -4.12872 | 0.97523  |
| H | 4.44372  | -0.05923 | -1.88033 | H                                                        | -5.88308 | -4.22386 | 2.69298  |
| C | 4.84259  | 3.16532  | -0.66902 | H                                                        | -4.80224 | -3.00345 | 2.06413  |
| H | 4.77558  | 3.6093   | -1.66818 | H                                                        | -2.29922 | -2.00635 | 0.397    |
| H | 4.3129   | 3.82173  | 0.02493  | Thermal correction to Energy=1.018025                    |          |          |          |
| H | 5.89948  | 3.13057  | -0.3815  | Thermal correction to Enthalpy=1.019175                  |          |          |          |
| C | 4.29101  | 1.95308  | 1.91288  | Thermal correction to Gibbs Free Energy=0.821962         |          |          |          |
| H | 4.13518  | 1.36523  | 2.82396  | Sum of electronic and zero-point Energies=-2277.759608   |          |          |          |
| H | 5.257    | 2.46252  | 1.99332  | Sum of electronic and thermal Energies=-2277.681903      |          |          |          |
| H | 3.50137  | 2.70623  | 1.86327  | Sum of electronic and thermal Enthalpies=-2277.680753    |          |          |          |
| C | 5.31142  | -0.06795 | 0.84943  | Sum of electronic and thermal Free Energies=-2277.877966 |          |          |          |
| H | 6.31825  | 0.36012  | 0.78726  | SCF Done: E(RM11L) = -2278.77529667                      |          |          |          |
| H | 5.2076   | -0.55097 | 1.82732  |                                                          |          |          |          |

| TS8d                               |          |          |          | C | 0.75584  | 5.33589  | 0.29281  |
|------------------------------------|----------|----------|----------|---|----------|----------|----------|
| Number of Negative Frequencies = 1 |          |          |          | H | 0.67681  | 6.33246  | -0.15683 |
| Ir                                 | 0.81943  | -0.05901 | -0.71136 | H | 0.17629  | 5.33804  | 1.22315  |
| B                                  | 0.61071  | 2.02925  | -1.05701 | H | 1.80246  | 5.1562   | 0.54719  |
| B                                  | 2.41705  | 0.87277  | 0.23359  | C | 5.06985  | 3.23983  | 0.57494  |
| O                                  | 0.95315  | 2.68904  | -2.24167 | H | 5.81396  | 3.41675  | 1.36064  |
| O                                  | 0.36215  | 2.9683   | -0.03867 | H | 5.5752   | 3.31693  | -0.39392 |
| C                                  | -2.1642  | -1.64953 | 2.11945  | H | 4.3204   | 4.032    | 0.62903  |
| C                                  | -1.24737 | 0.25797  | 3.28879  | C | 5.52906  | 0.77984  | 0.5165   |
| C                                  | -0.35257 | 0.40606  | 2.20955  | H | 5.09739  | -0.22057 | 0.59285  |
| H                                  | 0.37665  | 1.20459  | 2.20628  | H | 5.93888  | 0.88564  | -0.49383 |
| C                                  | -2.12739 | -3.31891 | -0.21857 | H | 6.35106  | 0.8794   | 1.23373  |
| N                                  | -0.38074 | -1.89363 | -1.10114 | C | 4.4043   | 1.01086  | 3.20126  |
| N                                  | -0.33859 | -0.38142 | 1.1408   | H | 5.22869  | 1.65897  | 3.52107  |
| O                                  | 2.59561  | 0.73473  | 1.618    | H | 3.73623  | 0.86327  | 4.05726  |
| O                                  | 3.44581  | 1.64968  | -0.29388 | H | 4.81557  | 0.03779  | 2.92455  |
| C                                  | -1.23933 | -2.22395 | -0.10272 | C | 2.92237  | 2.91922  | 2.53097  |
| C                                  | -1.23414 | -1.40492 | 1.08174  | H | 3.62782  | 3.67237  | 2.8979   |
| O                                  | 1.88105  | -2.52804 | 0.71952  | H | 2.32006  | 3.347    | 1.72592  |
| O                                  | 3.50997  | -1.7649  | -0.68704 | H | 2.24709  | 2.65764  | 3.35374  |
| C                                  | -3.04424 | -3.55582 | 0.86141  | C | 3.45733  | -3.99862 | -1.55447 |
| C                                  | -3.06758 | -2.75642 | 1.9672   | H | 3.95034  | -3.62023 | -2.45619 |
| H                                  | -3.74341 | -4.38144 | 0.79114  | H | 3.7444   | -5.04678 | -1.41836 |
| H                                  | -3.7859  | -2.96361 | 2.75244  | H | 2.37508  | -3.95003 | -1.71654 |
| C                                  | -2.17258 | -0.78643 | 3.25344  | C | 5.38543  | -3.21137 | -0.15762 |
| C                                  | 4.45504  | 1.85222  | 0.73094  | H | 5.89718  | -2.97344 | -1.09668 |
| C                                  | 3.63177  | 1.64796  | 2.05075  | H | 5.73263  | -2.50686 | 0.60167  |
| C                                  | 3.87571  | -3.13351 | -0.35822 | H | 5.68271  | -4.22245 | 0.14402  |
| C                                  | 3.01788  | -3.40511 | 0.9263   | C | 3.703    | -2.94771 | 2.21766  |
| C                                  | 1.00935  | 4.11249  | -2.00474 | H | 2.97606  | -2.98294 | 3.03614  |
| C                                  | 0.20646  | 4.27283  | -0.65501 | H | 4.55136  | -3.58854 | 2.48162  |
| H                                  | 1.58632  | 0.03681  | -2.10809 | H | 4.05083  | -1.91523 | 2.12497  |
| C                                  | 2.48808  | 4.48981  | -1.88213 | C | 2.50926  | -4.83581 | 1.073    |
| H                                  | 2.9511   | 3.9326   | -1.06806 | H | 3.34431  | -5.54349 | 1.13346  |
| H                                  | 3.00236  | 4.20911  | -2.80815 | H | 1.9206   | -4.92616 | 1.99289  |
| H                                  | 2.62871  | 5.56503  | -1.72443 | H | 1.86855  | -5.12189 | 0.23473  |
| C                                  | 0.38582  | 4.82581  | -3.20382 | B | 2.24755  | -1.51428 | -0.16197 |
| H                                  | 0.34428  | 5.90888  | -3.03852 | C | -2.12544 | 1.17225  | -0.65942 |
| H                                  | 0.99591  | 4.64392  | -4.09576 | C | -1.03551 | 0.94178  | -1.51256 |
| H                                  | -0.62448 | 4.46337  | -3.40974 | C | -1.33571 | 0.74353  | -2.87368 |
| C                                  | -1.29541 | 4.50464  | -0.86761 | C | -2.65733 | 0.70727  | -3.33815 |
| H                                  | -1.80863 | 4.41687  | 0.09637  | C | -3.72177 | 0.86476  | -2.45219 |
| H                                  | -1.49482 | 5.50248  | -1.27303 | C | -3.45647 | 1.10571  | -1.09345 |
| H                                  | -1.72386 | 3.76033  | -1.54295 | H | -0.51993 | 0.6069   | -3.57823 |

|                                                          |          |          |          |    |          |          |          |
|----------------------------------------------------------|----------|----------|----------|----|----------|----------|----------|
| H                                                        | -2.85387 | 0.54146  | -4.39528 | C  | 2.61995  | -2.40261 | 0.0729   |
| H                                                        | -4.75168 | 0.80917  | -2.79277 | H  | 2.06058  | -3.33327 | 0.12929  |
| C                                                        | -4.51656 | 1.23181  | -0.08057 | N  | 0.35653  | 0.88963  | 0.06191  |
| H                                                        | -4.14646 | 1.49841  | 0.92091  | N  | 1.89431  | -1.28806 | 0.0839   |
| N                                                        | -5.75059 | 1.01203  | -0.32003 | O  | -3.03427 | 0.59319  | -0.25071 |
| C                                                        | -6.72693 | 1.11957  | 0.79382  | O  | -3.27735 | -1.6384  | 0.17833  |
| C                                                        | -6.84029 | 2.58759  | 1.24659  | C  | 3.76233  | 2.41821  | -0.10363 |
| H                                                        | -5.8966  | 2.94351  | 1.67647  | C  | 4.54109  | 1.29709  | -0.11734 |
| H                                                        | -7.09277 | 3.23385  | 0.39774  | H  | 4.24043  | 3.39045  | -0.14779 |
| H                                                        | -7.62258 | 2.69788  | 2.00688  | H  | 5.61912  | 1.4004   | -0.1728  |
| C                                                        | -6.32048 | 0.222    | 1.98086  | C  | 1.50374  | 3.5165   | -0.02784 |
| H                                                        | -7.1054  | 0.22282  | 2.74618  | C  | 4.71857  | -1.2199  | -0.07096 |
| H                                                        | -6.16499 | -0.81058 | 1.64613  | C  | -4.59267 | -1.15468 | -0.18429 |
| H                                                        | -5.39538 | 0.56989  | 2.45325  | C  | -4.43994 | 0.39221  | 0.02247  |
| C                                                        | -8.07586 | 0.64489  | 0.23065  | Ir | -0.31852 | -0.94764 | 0.09763  |
| H                                                        | -8.00725 | -0.39508 | -0.11072 | C  | -4.8312  | -1.543   | -1.64935 |
| H                                                        | -8.86452 | 0.70667  | 0.99004  | H  | -4.72262 | -2.62831 | -1.75108 |
| H                                                        | -8.37214 | 1.26038  | -0.62688 | H  | -5.83506 | -1.26589 | -1.99037 |
| H                                                        | -1.94361 | 1.39232  | 0.3873   | H  | -4.09436 | -1.06603 | -2.30375 |
| H                                                        | -2.09864 | -3.86359 | -1.02516 | C  | -5.63356 | -1.82411 | 0.71014  |
| H                                                        | 0.46255  | -2.42227 | -1.0041  | H  | -6.63219 | -1.41035 | 0.52551  |
| H                                                        | -0.80241 | -2.09789 | -1.98458 | H  | -5.66881 | -2.89917 | 0.49997  |
| H                                                        | -2.87957 | -0.94676 | 4.04043  | H  | -5.39528 | -1.69724 | 1.76941  |
| H                                                        | -1.18463 | 0.9571   | 4.09636  | C  | -5.25803 | 1.25871  | -0.93128 |
| Thermal correction to Energy=1.016774                    |          |          |          | H  | -6.33127 | 1.07539  | -0.80227 |
| Thermal correction to Enthalpy=1.017924                  |          |          |          | H  | -5.06889 | 2.31829  | -0.72382 |
| Thermal correction to Gibbs Free Energy=0.821833         |          |          |          | H  | -4.99486 | 1.0693   | -1.97508 |
| Sum of electronic and zero-point Energies=-2277.752951   |          |          |          | C  | -4.68782 | 0.8315   | 1.4722   |
| Sum of electronic and thermal Energies=-2277.675923      |          |          |          | H  | -4.36631 | 1.87236  | 1.58939  |
| Sum of electronic and thermal Enthalpies=-2277.674773    |          |          |          | H  | -5.74705 | 0.76749  | 1.74475  |
| Sum of electronic and thermal Free Energies=-2277.870864 |          |          |          | H  | -4.10815 | 0.21955  | 2.1709   |
| SCF Done: E(RM11L) = -2278.76872010                      |          |          |          | C  | -0.86641 | 4.45827  | 0.04853  |
| <b>i'</b>                                                |          |          |          | H  | -1.89346 | 4.0864   | 0.11273  |
| <b>Number of Negative Frequencies = 0</b>                |          |          |          | H  | -0.69734 | 5.12455  | 0.90277  |
| B                                                        | -2.32825 | -0.60191 | 0.01045  | H  | -0.78748 | 5.06616  | -0.86087 |
| C                                                        | -0.39578 | 2.01214  | 0.07563  | C  | 2.12045  | 4.89052  | -0.08224 |
| H                                                        | -1.46462 | 1.85121  | 0.10201  | H  | 2.78805  | 5.05981  | 0.77234  |
| C                                                        | 0.12214  | 3.31521  | 0.03394  | H  | 2.72368  | 5.01939  | -0.98989 |
| C                                                        | 2.32625  | 2.35659  | -0.03677 | H  | 1.36721  | 5.67977  | -0.07359 |
| C                                                        | 1.73317  | 1.07436  | 0.01513  | C  | 6.22165  | -1.15665 | -0.16015 |
| C                                                        | 2.551    | -0.09832 | 0.01473  | H  | 6.53638  | -0.65065 | -1.08148 |
| C                                                        | 3.96048  | -0.0136  | -0.05818 | H  | 6.64083  | -0.58562 | 0.6774   |
| C                                                        | 4.02745  | -2.43379 | -0.008   | H  | 6.68012  | -2.14632 | -0.1511  |
|                                                          |          |          |          | C  | 4.72141  | -3.77486 | -0.02071 |

|                                                          |         |          |          |   |          |          |          |
|----------------------------------------------------------|---------|----------|----------|---|----------|----------|----------|
| H                                                        | 5.30859 | -3.91562 | -0.93603 | C | 2.60884  | 3.17449  | -2.23578 |
| H                                                        | 5.40849 | -3.88254 | 0.82721  | H | 2.14643  | 3.99527  | -1.67614 |
| H                                                        | 3.99325 | -4.58986 | 0.03557  | H | 3.35344  | 3.6038   | -2.91514 |
| Thermal correction to Energy=-.507836                    |         |          |          | H | 1.82853  | 2.68985  | -2.83168 |
| Thermal correction to Enthalpy=0.508986                  |         |          |          | C | 4.31117  | 2.88652  | -0.42051 |
| Thermal correction to Gibbs Free Energy=0.390162         |         |          |          | H | 5.15236  | 3.18522  | -1.05742 |
| Sum of electronic and zero-point Energies=-1244.178598   |         |          |          | H | 3.89592  | 3.79187  | 0.03736  |
| Sum of electronic and thermal Energies=-1244.138520      |         |          |          | H | 4.69105  | 2.24974  | 0.38055  |
| Sum of electronic and thermal Enthalpies=-1244.137369    |         |          |          | C | -4.51878 | -4.16891 | -0.38098 |
| Sum of electronic and thermal Free Energies=-1244.256193 |         |          |          | H | -5.22288 | -4.32674 | -1.20677 |
| SCF Done: E(RM11L) = -1244.76447873                      |         |          |          | H | -3.64367 | -4.79974 | -0.56633 |

**zbf**

**Number of Negative Frequencies = 0**

|    |          |          |          |   |          |          |          |
|----|----------|----------|----------|---|----------|----------|----------|
| Ir | -0.20436 | -0.32057 | -0.4747  | H | -7.09552 | -1.43959 | -0.63565 |
| B  | 1.59795  | 0.55682  | -0.90509 | H | -6.75481 | -3.02697 | 0.06225  |
| O  | 2.4545   | 0.08233  | -1.92162 | C | -3.78366 | 4.78895  | 0.62508  |
| O  | 2.17516  | 1.73431  | -0.36765 | H | -4.52797 | 4.91445  | -0.172   |
| C  | -3.45751 | 2.29355  | 0.2671   | H | -4.338   | 4.67344  | 1.56516  |
| C  | -1.51497 | 3.70845  | 0.20231  | H | -3.21353 | 5.71697  | 0.69149  |
| C  | -0.74451 | 2.56425  | -0.05031 | C | -0.78987 | 5.0318   | 0.28221  |
| H  | 0.32746  | 2.64371  | -0.16585 | H | -1.15437 | 5.73629  | -0.47511 |
| C  | -4.55465 | -0.36111 | 0.07933  | H | -0.9252  | 5.50757  | 1.26115  |
| N  | -2.27816 | -1.14121 | -0.28754 | H | 0.2844   | 4.89831  | 0.12303  |
| N  | -1.24396 | 1.31186  | -0.15364 | C | -2.7582  | -2.379   | -0.38298 |
| C  | -3.16586 | -0.13265 | -0.06441 | H | -2.02423 | -3.15763 | -0.56679 |
| C  | -2.61723 | 1.18397  | 0.0164   | C | 0.78837  | -3.3129  | 0.28763  |
| C  | -5.3902  | 0.77937  | 0.32459  | C | 1.99404  | -2.73399 | 0.72245  |
| C  | -4.86521 | 2.03608  | 0.41524  | C | 0.76459  | -4.15539 | -0.82805 |
| H  | -6.45939 | 0.64037  | 0.44084  | C | 3.18214  | -3.0429  | 0.03951  |
| H  | -5.52919 | 2.87187  | 0.60503  | C | 1.94907  | -4.43972 | -1.5111  |
| C  | -5.04358 | -1.69484 | -0.01903 | H | -0.1743  | -4.59481 | -1.15504 |
| C  | -2.89906 | 3.59727  | 0.36212  | C | 3.1581   | -3.88823 | -1.06625 |
| C  | 3.68571  | 0.84251  | -1.91744 | H | 4.11128  | -2.59944 | 0.38034  |
| C  | 3.23663  | 2.18386  | -1.24464 | H | 1.93501  | -5.09355 | -2.37907 |
| C  | -4.12056 | -2.71766 | -0.25859 | H | 4.0823   | -4.11538 | -1.5915  |
| C  | 4.7052   | 0.06522  | -1.07534 | C | 1.96381  | -1.78998 | 1.85906  |
| H  | 4.3568   | -0.04716 | -0.044   | H | 0.96681  | -1.62733 | 2.2828   |
| H  | 4.82788  | -0.93584 | -1.50128 | N | 3.01192  | -1.20225 | 2.28572  |
| H  | 5.68461  | 0.55691  | -1.06711 | C | 2.94276  | -0.21973 | 3.38302  |
| C  | 4.18473  | 0.97802  | -3.35367 | C | 3.57816  | 1.07009  | 2.82886  |
| H  | 5.07052  | 1.62288  | -3.40281 | H | 2.99992  | 1.44648  | 1.97914  |
| H  | 4.46342  | -0.00745 | -3.74402 | H | 3.61449  | 1.84444  | 3.60497  |
| H  | 3.41507  | 1.39275  | -4.00997 | H | 4.60144  | 0.87588  | 2.48782  |

|                                                          |          |          |         |   |          |          |          |
|----------------------------------------------------------|----------|----------|---------|---|----------|----------|----------|
| C                                                        | 3.81286  | -0.78213 | 4.52318 | H | 4.86044  | -2.08712 | 0.41903  |
| H                                                        | 3.90148  | -0.05252 | 5.33693 | H | 4.84442  | -3.72338 | -0.27079 |
| H                                                        | 3.37415  | -1.7009  | 4.93137 | C | 3.38576  | -3.75342 | 2.03524  |
| H                                                        | 4.81911  | -1.01854 | 4.15881 | H | 3.80915  | -4.75273 | 1.87974  |
| C                                                        | 1.53053  | 0.0945   | 3.90562 | H | 4.1471   | -3.13642 | 2.52578  |
| H                                                        | 0.88722  | 0.48267  | 3.1061  | H | 2.5336   | -3.8355  | 2.71465  |
| H                                                        | 1.04706  | -0.7888  | 4.34019 | C | 0.9316   | -4.68301 | 0.79636  |
| H                                                        | 1.59046  | 0.85693  | 4.69041 | H | 0.10776  | -5.07898 | 0.19267  |
| H                                                        | -0.12769 | -3.10644 | 0.83575 | H | 1.43348  | -5.52934 | 1.27747  |
| Thermal correction to Energy=0.764407                    |          |          |         | H | 0.50413  | -4.04318 | 1.57551  |
| Thermal correction to Enthalpy=0.765557                  |          |          |         | C | 2.41805  | -4.79394 | -1.21527 |
| Thermal correction to Gibbs Free Energy=0.604557         |          |          |         | H | 3.04948  | -5.59017 | -0.80361 |
| Sum of electronic and zero-point Energies=-1726.942068   |          |          |         | H | 1.57801  | -5.26572 | -1.73764 |
| Sum of electronic and thermal Energies=-1726.882794      |          |          |         | H | 2.99887  | -4.23479 | -1.95295 |
| Sum of electronic and thermal Enthalpies=-1726.881644    |          |          |         | C | -2.27358 | 5.19732  | 0.61197  |
| Sum of electronic and thermal Free Energies=-1727.042643 |          |          |         | H | -2.74964 | 5.58696  | 1.51971  |
| SCF Done: E(RM11L) = -1727.75804394                      |          |          |         | H | -1.19647 | 5.37048  | 0.6997   |
|                                                          |          |          |         | H | -2.63979 | 5.79485  | -0.23133 |
|                                                          |          |          |         | C | -5.07751 | 4.11635  | 0.30672  |
|                                                          |          |          |         | H | -5.63347 | 4.04667  | -0.63652 |
|                                                          |          |          |         | H | -5.76516 | 3.81925  | 1.10822  |
|                                                          |          |          |         | H | -4.81843 | 5.16442  | 0.46238  |
|                                                          |          |          |         | C | -5.6481  | -3.07774 | -0.74592 |
|                                                          |          |          |         | H | -6.29493 | -2.90349 | 0.12253  |
|                                                          |          |          |         | H | -6.16787 | -2.6677  | -1.62088 |
|                                                          |          |          |         | H | -5.56128 | -4.15601 | -0.8854  |
|                                                          |          |          |         | C | -3.05698 | -4.61914 | -0.8779  |
|                                                          |          |          |         | H | -3.57088 | -5.18416 | -0.09078 |
|                                                          |          |          |         | H | -3.53273 | -4.87867 | -1.83094 |
|                                                          |          |          |         | H | -2.02115 | -4.96845 | -0.91679 |
|                                                          |          |          |         | C | -1.48472 | 2.8288   | 0.37456  |
|                                                          |          |          |         | H | -0.46935 | 3.1996   | 0.47932  |
|                                                          |          |          |         | C | 1.61185  | 1.1446   | 0.91839  |
|                                                          |          |          |         | C | 2.97507  | 1.19687  | 0.53317  |
|                                                          |          |          |         | C | 1.25343  | 1.76212  | 2.13911  |
|                                                          |          |          |         | C | 3.94224  | 1.69558  | 1.41191  |
|                                                          |          |          |         | C | 2.22415  | 2.25966  | 3.00962  |
|                                                          |          |          |         | H | 0.20821  | 1.81272  | 2.42793  |
|                                                          |          |          |         | C | 3.57598  | 2.21072  | 2.65723  |
|                                                          |          |          |         | H | 4.98742  | 1.68656  | 1.11461  |
|                                                          |          |          |         | H | 1.92315  | 2.68328  | 3.9649   |
|                                                          |          |          |         | H | 4.33586  | 2.59296  | 3.33375  |
|                                                          |          |          |         | H | 0.97154  | 1.24659  | -0.1986  |
|                                                          |          |          |         | C | 3.38108  | 0.70859  | -0.82223 |

### TS3b'

#### Number of Negative Frequencies = 1

|    |          |          |          |   |          |          |          |
|----|----------|----------|----------|---|----------|----------|----------|
| Ir | -0.03311 | -0.04061 | 0.13176  | H | -5.76516 | 3.81925  | 1.10822  |
| B  | 1.2587   | -1.64948 | 0.09934  | H | -4.81843 | 5.16442  | 0.46238  |
| O  | 2.32854  | -1.85463 | 0.9874   | C | -5.6481  | -3.07774 | -0.74592 |
| O  | 1.1282   | -2.8094  | -0.69972 | H | -6.29493 | -2.90349 | 0.12253  |
| C  | -4.22957 | -1.01361 | -0.32788 | H | -6.16787 | -2.6677  | -1.62088 |
| C  | -3.11115 | -3.13273 | -0.61847 | H | -5.56128 | -4.15601 | -0.8854  |
| C  | -1.89486 | -2.44807 | -0.43887 | C | -3.05698 | -4.61914 | -0.8779  |
| H  | -0.95276 | -2.97472 | -0.51289 | H | -3.57088 | -5.18416 | -0.09078 |
| C  | -4.01767 | 1.82032  | 0.09297  | H | -3.53273 | -4.87867 | -1.83094 |
| N  | -1.60794 | 1.51319  | 0.213    | H | -2.02115 | -4.96845 | -0.91679 |
| N  | -1.79356 | -1.13406 | -0.20777 | C | -1.48472 | 2.8288   | 0.37456  |
| C  | -2.86265 | 1.00439  | 0.0635   | H | -0.46935 | 3.1996   | 0.47932  |
| C  | -2.96291 | -0.41104 | -0.15092 | C | 1.61185  | 1.1446   | 0.91839  |
| C  | -5.29086 | 1.18032  | -0.07769 | C | 2.97507  | 1.19687  | 0.53317  |
| C  | -5.38917 | -0.16652 | -0.275   | C | 1.25343  | 1.76212  | 2.13911  |
| H  | -6.19403 | 1.77983  | -0.05403 | C | 3.94224  | 1.69558  | 1.41191  |
| H  | -6.36948 | -0.61077 | -0.40449 | C | 2.22415  | 2.25966  | 3.00962  |
| C  | -3.86273 | 3.22498  | 0.27882  | H | 0.20821  | 1.81272  | 2.42793  |
| C  | -4.30727 | -2.41709 | -0.56011 | C | 3.57598  | 2.21072  | 2.65723  |
| C  | 2.9861   | -3.11315 | 0.70685  | H | 4.98742  | 1.68656  | 1.11461  |
| C  | 1.89021  | -3.89013 | -0.10424 | H | 1.92315  | 2.68328  | 3.9649   |
| C  | -2.56718 | 3.72937  | 0.41915  | H | 4.33586  | 2.59296  | 3.33375  |
| C  | 4.246    | -2.81857 | -0.11659 | H | 0.97154  | 1.24659  | -0.1986  |
| H  | 3.99634  | -2.4027  | -1.09694 | C | 3.38108  | 0.70859  | -0.82223 |

|                                                          |          |          |          |   |          |          |          |
|----------------------------------------------------------|----------|----------|----------|---|----------|----------|----------|
| H                                                        | 3.44349  | -0.378   | -0.89765 | C | 1.17479  | 3.42163  | -1.44904 |
| N                                                        | 3.67022  | 1.34643  | -1.88789 | C | -4.22639 | -1.62628 | -0.04286 |
| C                                                        | 3.63127  | 2.81773  | -2.06345 | C | -4.13676 | -1.12287 | -1.527   |
| C                                                        | 2.47044  | 3.54654  | -1.35581 | H | -0.15881 | -2.99489 | -0.47744 |
| H                                                        | 2.59314  | 3.57829  | -0.27136 | C | 4.62602  | -1.89783 | -0.21833 |
| H                                                        | 2.41695  | 4.58065  | -1.71736 | C | -5.20862 | -0.86193 | 0.83948  |
| H                                                        | 1.51466  | 3.06021  | -1.58327 | H | -6.23214 | -0.95806 | 0.45855  |
| C                                                        | 3.48074  | 3.02732  | -3.58331 | H | -5.18525 | -1.26766 | 1.857    |
| H                                                        | 3.50264  | 4.09417  | -3.83627 | H | -4.95647 | 0.19977  | 0.89702  |
| H                                                        | 4.29045  | 2.52451  | -4.1241  | C | -4.48793 | -3.13399 | 0.06281  |
| H                                                        | 2.52958  | 2.6105   | -3.93672 | H | -3.78899 | -3.69779 | -0.56366 |
| C                                                        | 4.9842   | 3.39273  | -1.60448 | H | -4.33933 | -3.44888 | 1.10113  |
| H                                                        | 5.09167  | 3.32228  | -0.51786 | H | -5.51086 | -3.39189 | -0.23233 |
| H                                                        | 5.8146   | 2.84866  | -2.06949 | C | -5.00122 | -1.89075 | -2.523   |
| H                                                        | 5.06483  | 4.44886  | -1.88868 | H | -6.06268 | -1.81049 | -2.26047 |
| Thermal correction to Energy= 0.760170                   |          |          |          | H | -4.86961 | -1.4742  | -3.52816 |
| Thermal correction to Enthalpy=0.761320                  |          |          |          | H | -4.73074 | -2.94898 | -2.5591  |
| Thermal correction to Gibbs Free Energy=0.604398         |          |          |          | C | -4.38842 | 0.38326  | -1.66838 |
| Sum of electronic and zero-point Energies=-1726.919476   |          |          |          | H | -5.44014 | 0.63931  | -1.49987 |
| Sum of electronic and thermal Energies=-1726.861304      |          |          |          | H | -3.77733 | 0.95025  | -0.96069 |
| Sum of electronic and thermal Enthalpies=-1726.860154    |          |          |          | H | -4.11795 | 0.69735  | -2.68262 |
| Sum of electronic and thermal Free Energies=-1727.017075 |          |          |          | C | 5.54101  | -3.07627 | 0.00932  |
| SCF Done: E(RM11L) = -1727.72956927                      |          |          |          | H | 6.02949  | -3.02253 | 0.98946  |
|                                                          |          |          |          | H | 4.98135  | -4.01579 | -0.03211 |
|                                                          |          |          |          | H | 6.33259  | -3.12426 | -0.74793 |
| <b>4b'</b>                                               |          |          |          | C | 6.51635  | -0.21947 | 0.02578  |
| <b>Number of Negative Frequencies = 0</b>                |          |          |          | H | 6.94007  | 0.30306  | -0.84085 |
| Ir                                                       | 0.02925  | -1.39784 | -0.63128 | H | 6.61421  | 0.45314  | 0.88656  |
| B                                                        | -2.0002  | -1.38766 | -0.64139 | H | 7.13201  | -1.09878 | 0.21887  |
| C                                                        | 2.15443  | 2.46652  | -1.05048 | C | 1.55375  | 4.87213  | -1.59241 |
| C                                                        | -0.11979 | 2.96592  | -1.7067  | H | 1.98266  | 5.25343  | -0.65807 |
| C                                                        | -0.41622 | 1.61233  | -1.45605 | H | 2.31205  | 5.00646  | -2.37406 |
| H                                                        | -1.42832 | 1.24536  | -1.58696 | H | 0.69822  | 5.49941  | -1.84564 |
| C                                                        | 4.11729  | 0.45786  | -0.44924 | C | -1.22471 | 3.86792  | -2.19989 |
| N                                                        | 2.34869  | -1.19489 | -0.65316 | H | -1.48049 | 4.63297  | -1.45715 |
| N                                                        | 0.47295  | 0.71179  | -1.03892 | H | -0.93546 | 4.38677  | -3.12077 |
| O                                                        | -2.73913 | -1.35309 | -1.83984 | H | -2.13144 | 3.29361  | -2.41185 |
| O                                                        | -2.88161 | -1.39373 | 0.44365  | C | 3.25523  | -2.1418  | -0.44759 |
| C                                                        | 2.76322  | 0.09925  | -0.65039 | H | 2.88286  | -3.16169 | -0.4539  |
| C                                                        | 1.77054  | 1.11313  | -0.90304 | C | -0.16985 | -0.23757 | 2.22619  |
| C                                                        | 4.46135  | 1.85061  | -0.51558 | C | 0.20488  | -1.3156  | 1.3712   |
| C                                                        | 3.53101  | 2.80331  | -0.81484 | C | 0.91212  | -2.38165 | 1.98841  |
| H                                                        | 5.4893   | 2.15125  | -0.34629 | C | 1.25852  | -2.38471 | 3.33757  |
| H                                                        | 3.84071  | 3.83995  | -0.88358 | C | 0.90287  | -1.30649 | 4.15544  |
| C                                                        | 5.07201  | -0.57491 | -0.2139  |   |          |          |          |

|                                                          |          |          |         |   |          |          |          |
|----------------------------------------------------------|----------|----------|---------|---|----------|----------|----------|
| C                                                        | 0.19176  | -0.25705 | 3.59202 | C | 1.77054  | 1.11313  | -0.90304 |
| H                                                        | 1.20859  | -3.23271 | 1.38424 | C | 4.46135  | 1.85061  | -0.51558 |
| H                                                        | 1.80021  | -3.23387 | 3.75034 | C | 3.53101  | 2.80331  | -0.81484 |
| H                                                        | -0.12056 | 0.58426  | 4.20403 | H | 5.4893   | 2.15125  | -0.34629 |
| H                                                        | 1.15841  | -1.2973  | 5.21218 | H | 3.84071  | 3.83995  | -0.88358 |
| C                                                        | -0.98824 | 0.91477  | 1.77989 | C | 5.07201  | -0.57491 | -0.2139  |
| N                                                        | -0.97672 | 2.0192   | 2.42546 | C | 1.17479  | 3.42163  | -1.44904 |
| C                                                        | -1.87718 | 3.13622  | 2.10625 | C | -4.22639 | -1.62628 | -0.04286 |
| C                                                        | -2.61615 | 3.46045  | 3.4205  | C | -4.13676 | -1.12287 | -1.527   |
| H                                                        | -3.24921 | 2.61757  | 3.72307 | H | -0.15881 | -2.99489 | -0.47744 |
| H                                                        | -1.90055 | 3.65408  | 4.22748 | C | 4.62602  | -1.89783 | -0.21833 |
| H                                                        | -3.25414 | 4.34453  | 3.30047 | C | -5.20862 | -0.86193 | 0.83948  |
| C                                                        | -0.98142 | 4.32834  | 1.71577 | H | -6.23214 | -0.95806 | 0.45855  |
| H                                                        | -0.42517 | 4.10947  | 0.79818 | H | -5.18525 | -1.26766 | 1.857    |
| H                                                        | -1.58394 | 5.23006  | 1.55219 | H | -4.95647 | 0.19977  | 0.89702  |
| H                                                        | -0.25407 | 4.53799  | 2.50835 | C | -4.48793 | -3.13399 | 0.06281  |
| C                                                        | -2.9134  | 2.87163  | 1.00187 | H | -3.78899 | -3.69779 | -0.56366 |
| H                                                        | -3.54307 | 3.75695  | 0.85755 | H | -4.33933 | -3.44888 | 1.10113  |
| H                                                        | -2.43824 | 2.64529  | 0.04485 | H | -5.51086 | -3.39189 | -0.23233 |
| H                                                        | -3.56768 | 2.03362  | 1.26697 | C | -5.00122 | -1.89075 | -2.523   |
| H                                                        | -1.62507 | 0.73087  | 0.91359 | H | -6.06268 | -1.81049 | -2.26047 |
| Thermal correction to Energy=0.761379                    |          |          |         | H | -4.86961 | -1.4742  | -3.52816 |
| Thermal correction to Enthalpy=0.762529                  |          |          |         | H | -4.73074 | -2.94898 | -2.5591  |
| Thermal correction to Gibbs Free Energy=0.604600         |          |          |         | C | -4.38842 | 0.38326  | -1.66838 |
| Sum of electronic and zero-point Energies=-1726.977642   |          |          |         | H | -5.44014 | 0.63931  | -1.49987 |
| Sum of electronic and thermal Energies=-1726.918779      |          |          |         | H | -3.77733 | 0.95025  | -0.96069 |
| Sum of electronic and thermal Enthalpies=-1726.917629    |          |          |         | H | -4.11795 | 0.69735  | -2.68262 |
| Sum of electronic and thermal Free Energies=-1727.075558 |          |          |         | C | 5.54101  | -3.07627 | 0.00932  |
| SCF Done: E(RM11L) = -1727.78408100                      |          |          |         | H | 6.02949  | -3.02253 | 0.98946  |
|                                                          |          |          |         | H | 4.98135  | -4.01579 | -0.03211 |
|                                                          |          |          |         | H | 6.33259  | -3.12426 | -0.74793 |
|                                                          |          |          |         | C | 6.51635  | -0.21947 | 0.02578  |
|                                                          |          |          |         | H | 6.94007  | 0.30306  | -0.84085 |
|                                                          |          |          |         | H | 6.61421  | 0.45314  | 0.88656  |
|                                                          |          |          |         | H | 7.13201  | -1.09878 | 0.21887  |
|                                                          |          |          |         | C | 1.55375  | 4.87213  | -1.59241 |
|                                                          |          |          |         | H | 1.98266  | 5.25343  | -0.65807 |
|                                                          |          |          |         | H | 2.31205  | 5.00646  | -2.37406 |
|                                                          |          |          |         | H | 0.69822  | 5.49941  | -1.84564 |
|                                                          |          |          |         | C | -1.22471 | 3.86792  | -2.19989 |
|                                                          |          |          |         | H | -1.48049 | 4.63297  | -1.45715 |
|                                                          |          |          |         | H | -0.93546 | 4.38677  | -3.12077 |
|                                                          |          |          |         | H | -2.13144 | 3.29361  | -2.41185 |
|                                                          |          |          |         | C | 3.25523  | -2.1418  | -0.44759 |

5b'

Number of Negative Frequencies = 0

|    |          |          |          |   |          |          |          |
|----|----------|----------|----------|---|----------|----------|----------|
| Ir | 0.02925  | -1.39784 | -0.63128 | H | 6.94007  | 0.30306  | -0.84085 |
| B  | -2.0002  | -1.38766 | -0.64139 | H | 6.61421  | 0.45314  | 0.88656  |
| C  | 2.15443  | 2.46652  | -1.05048 | H | 7.13201  | -1.09878 | 0.21887  |
| C  | -0.11979 | 2.96592  | -1.7067  | C | 1.55375  | 4.87213  | -1.59241 |
| C  | -0.41622 | 1.61233  | -1.45605 | H | 1.98266  | 5.25343  | -0.65807 |
| H  | -1.42832 | 1.24536  | -1.58696 | H | 2.31205  | 5.00646  | -2.37406 |
| C  | 4.11729  | 0.45786  | -0.44924 | H | 0.69822  | 5.49941  | -1.84564 |
| N  | 2.34869  | -1.19489 | -0.65316 | C | -1.22471 | 3.86792  | -2.19989 |
| N  | 0.47295  | 0.71179  | -1.03892 | H | -1.48049 | 4.63297  | -1.45715 |
| O  | -2.73913 | -1.35309 | -1.83984 | H | -0.93546 | 4.38677  | -3.12077 |
| O  | -2.88161 | -1.39373 | 0.44365  | H | -2.13144 | 3.29361  | -2.41185 |
| C  | 2.76322  | 0.09925  | -0.65039 | C | 3.25523  | -2.1418  | -0.44759 |



|                                                          |          |          |          |   |          |          |          |
|----------------------------------------------------------|----------|----------|----------|---|----------|----------|----------|
| H                                                        | 2.88286  | -3.16169 | -0.4539  | C | -3.38383 | 2.43367  | -0.16128 |
| C                                                        | -0.16985 | -0.23757 | 2.22619  | N | -1.05577 | 1.72264  | 0.01949  |
| C                                                        | 0.20488  | -1.3156  | 1.3712   | N | -1.73961 | -0.72368 | 0.79618  |
| C                                                        | 0.91212  | -2.38165 | 1.98841  | O | 0.20119  | -2.52808 | -0.72736 |
| C                                                        | 1.25852  | -2.38471 | 3.33757  | O | 1.63164  | -1.11684 | -1.87055 |
| C                                                        | 0.90287  | -1.30649 | 4.15544  | C | -2.39992 | 1.46538  | 0.14063  |
| C                                                        | 0.19176  | -0.25705 | 3.59202  | C | -2.76455 | 0.14672  | 0.55575  |
| H                                                        | 1.20859  | -3.23271 | 1.38424  | C | -4.75937 | 2.04609  | -0.00885 |
| H                                                        | 1.80021  | -3.23387 | 3.75034  | C | -5.11182 | 0.78692  | 0.38343  |
| H                                                        | -0.12056 | 0.58426  | 4.20403  | H | -5.53722 | 2.77101  | -0.22053 |
| H                                                        | 1.15841  | -1.2973  | 5.21218  | H | -6.16319 | 0.53687  | 0.47329  |
| C                                                        | -0.98824 | 0.91477  | 1.77989  | C | -2.97822 | 3.72226  | -0.60854 |
| N                                                        | -0.97672 | 2.0192   | 2.42546  | C | -4.45079 | -1.55593 | 1.03229  |
| C                                                        | -1.87718 | 3.13622  | 2.10625  | C | 0.8788   | -1.83937 | -2.8637  |
| C                                                        | -2.61615 | 3.46045  | 3.4205   | C | 0.36053  | -3.07715 | -2.04684 |
| H                                                        | -3.24921 | 2.61757  | 3.72307  | H | 1.50008  | 1.22511  | 0.28705  |
| H                                                        | -1.90055 | 3.65408  | 4.22748  | C | -1.60637 | 3.96462  | -0.73409 |
| H                                                        | -3.25414 | 4.34453  | 3.30047  | C | 1.80504  | -2.17854 | -4.02892 |
| C                                                        | -0.98142 | 4.32834  | 1.71577  | H | 1.29258  | -2.8078  | -4.76614 |
| H                                                        | -0.42517 | 4.10947  | 0.79818  | H | 2.12168  | -1.25765 | -4.53144 |
| H                                                        | -1.58394 | 5.23006  | 1.55219  | H | 2.70375  | -2.69955 | -3.68822 |
| H                                                        | -0.25407 | 4.53799  | 2.50835  | C | -0.2582  | -0.92443 | -3.34233 |
| C                                                        | -2.9134  | 2.87163  | 1.00187  | H | -0.92486 | -0.6703  | -2.51258 |
| H                                                        | -3.54307 | 3.75695  | 0.85755  | H | 0.17447  | 0.00834  | -3.72012 |
| H                                                        | -2.43824 | 2.64529  | 0.04485  | H | -0.84326 | -1.38513 | -4.14596 |
| H                                                        | -3.56768 | 2.03362  | 1.26697  | C | -0.98141 | -3.63985 | -2.50978 |
| H                                                        | -1.62507 | 0.73087  | 0.91359  | H | -0.92491 | -3.99048 | -3.54705 |
| Thermal correction to Energy=0.761379                    |          |          |          | H | -1.26402 | -4.49147 | -1.8798  |
| Thermal correction to Enthalpy=0.762529                  |          |          |          | H | -1.77418 | -2.89097 | -2.43504 |
| Thermal correction to Gibbs Free Energy=0.604600         |          |          |          | C | 1.40229  | -4.20075 | -1.95102 |
| Sum of electronic and zero-point Energies=-1726.977642   |          |          |          | H | 1.53358  | -4.72501 | -2.90424 |
| Sum of electronic and thermal Energies=-1726.918779      |          |          |          | H | 2.3717   | -3.80381 | -1.63236 |
| Sum of electronic and thermal Enthalpies=-1726.917629    |          |          |          | H | 1.07086  | -4.92841 | -1.20192 |
| Sum of electronic and thermal Free Energies=-1727.075558 |          |          |          | C | -1.05059 | 5.28418  | -1.21414 |
| SCF Done: E(RM11L) = -1727.78408091                      |          |          |          | H | -1.35608 | 6.1109   | -0.56186 |
| <b>TS6b'</b>                                             |          |          |          | H | 0.04316  | 5.26234  | -1.23535 |
| <b>Number of Negative Frequencies = 1</b>                |          |          |          | H | -1.39973 | 5.51959  | -2.22658 |
| Ir                                                       | 0.24336  | 0.26635  | 0.55529  | C | -4.01242 | 4.76648  | -0.93812 |
| B                                                        | 1.03778  | -1.38066 | -0.61011 | H | -4.67416 | 4.42447  | -1.744   |
| C                                                        | -4.12675 | -0.21922 | 0.66629  | H | -4.64859 | 4.97832  | -0.06962 |
| C                                                        | -3.39487 | -2.44767 | 1.23161  | H | -3.56211 | 5.70774  | -1.2559  |
| C                                                        | -2.0732  | -1.97583 | 1.10217  | C | -5.8924  | -1.9729  | 1.16757  |
| H                                                        | -1.25156 | -2.66834 | 1.22105  | H | -6.42197 | -1.32884 | 1.87986  |
|                                                          |          |          |          | H | -6.4167  | -1.88885 | 0.20708  |

|   |          |          |          |
|---|----------|----------|----------|
| H | -5.99404 | -3.00286 | 1.51252  |
| C | -3.60448 | -3.90268 | 1.57545  |
| H | -4.14402 | -4.0213  | 2.52283  |
| H | -4.18621 | -4.41795 | 0.80176  |
| H | -2.64558 | -4.42117 | 1.67203  |
| C | -0.69683 | 2.94577  | -0.40818 |
| H | 0.36757  | 3.11543  | -0.50169 |
| C | 1.47655  | -1.89745 | 1.95267  |
| C | 1.95294  | -1.28029 | 0.77439  |
| C | 3.31397  | -0.82497 | 0.78884  |
| C | 4.12279  | -1.07554 | 1.89437  |
| C | 3.60148  | -1.66017 | 3.0588   |
| C | 2.27014  | -2.0503  | 3.10039  |
| H | 5.17241  | -0.79799 | 1.85876  |
| H | 1.85451  | -2.51047 | 3.99311  |
| H | 4.24812  | -1.8138  | 3.91922  |
| C | 3.94122  | -0.21518 | -0.42384 |
| H | 3.91255  | -0.88712 | -1.28619 |
| N | 4.51427  | 0.90213  | -0.63845 |
| C | 4.63584  | 2.08825  | 0.22881  |
| C | 6.14675  | 2.38388  | 0.30782  |
| H | 6.58154  | 2.46744  | -0.69457 |
| H | 6.32643  | 3.32277  | 0.84513  |
| H | 6.67068  | 1.58039  | 0.84031  |
| C | 4.05033  | 2.06575  | 1.65496  |
| H | 3.00468  | 1.74783  | 1.65678  |
| H | 4.61485  | 1.41311  | 2.32491  |
| H | 4.09687  | 3.08066  | 2.07006  |
| C | 3.93535  | 3.21199  | -0.56813 |
| H | 4.33127  | 3.26865  | -1.58789 |
| H | 2.85829  | 3.01736  | -0.62954 |
| H | 4.08653  | 4.18216  | -0.07977 |
| H | 0.48377  | -2.32801 | 1.95726  |

Thermal correction to Energy=0.759795

Thermal correction to Enthalpy=0.760945

Thermal correction to Gibbs Free Energy=0.603731

Sum of electronic and zero-point Energies=-1726.934326

Sum of electronic and thermal Energies=-1726.876159

Sum of electronic and thermal Enthalpies=-1726.875009

Sum of electronic and thermal Free Energies=-1727.032223

SCF Done: E(RM11L) = -1727.74340369

### Number of Negative Frequencies = 0

|    |          |          |          |
|----|----------|----------|----------|
| C  | -3.70115 | -1.24346 | -1.89212 |
| H  | -3.59626 | -2.2585  | -2.25072 |
| C  | -4.37966 | -0.2819  | -2.65745 |
| C  | -3.91745 | 1.32471  | -0.92348 |
| C  | -3.25843 | 0.30166  | -0.21182 |
| C  | -2.64961 | 0.5566   | 1.04633  |
| C  | -2.67936 | 1.8381   | 1.63377  |
| C  | -1.37232 | 0.93186  | 3.45408  |
| C  | -1.40813 | -0.30839 | 2.78734  |
| H  | -0.90854 | -1.17198 | 3.21703  |
| N  | -3.13843 | -0.99427 | -0.68892 |
| N  | -2.0228  | -0.51501 | 1.61959  |
| C  | -3.94102 | 2.62725  | -0.31079 |
| C  | -3.35594 | 2.87274  | 0.90028  |
| H  | -4.43594 | 3.43986  | -0.83135 |
| H  | -3.39471 | 3.87487  | 1.31319  |
| C  | -4.49956 | 1.03177  | -2.18651 |
| C  | -2.02181 | 2.03172  | 2.8812   |
| Ir | -2.16654 | -2.25408 | 0.42433  |
| O  | 1.13017  | 1.14268  | 0.06208  |
| H  | -2.34436 | -3.56875 | -0.57522 |
| C  | -0.61725 | 1.02394  | 4.75849  |
| H  | -1.27703 | 1.30417  | 5.58877  |
| H  | -0.15376 | 0.06537  | 5.01128  |
| H  | 0.17917  | 1.77574  | 4.70695  |
| C  | -2.01144 | 3.39429  | 3.52381  |
| H  | -1.41047 | 4.0975   | 2.9318   |
| H  | -3.0232  | 3.81072  | 3.58977  |
| H  | -1.59577 | 3.37288  | 4.5323   |
| C  | -5.20318 | 2.11335  | -2.96498 |
| H  | -6.04263 | 2.53039  | -2.39404 |
| H  | -4.5226  | 2.9454   | -3.18695 |
| H  | -5.5986  | 1.74906  | -3.91435 |
| C  | -4.95871 | -0.72158 | -3.98213 |
| H  | -6.04515 | -0.57515 | -4.01121 |
| H  | -4.53054 | -0.15247 | -4.81583 |
| H  | -4.75991 | -1.78174 | -4.16492 |
| B  | 2.17535  | 0.52025  | -0.57442 |
| O  | 2.85733  | 1.35003  | -1.43138 |
| C  | 0.95342  | 2.45007  | -0.56788 |
| C  | 2.37141  | 2.70789  | -1.19885 |
| C  | 3.35975  | 3.35976  | -0.22591 |
| H  | 3.38136  | 2.82706  | 0.73075  |

|   |          |          |          |
|---|----------|----------|----------|
| H | 4.36492  | 3.32159  | -0.65837 |
| H | 3.10678  | 4.40791  | -0.03685 |
| C | 2.36075  | 3.45291  | -2.52778 |
| H | 1.7861   | 2.91678  | -3.28694 |
| H | 1.93134  | 4.45347  | -2.40483 |
| H | 3.38584  | 3.56612  | -2.89664 |
| C | 0.53744  | 3.45957  | 0.49604  |
| H | 0.52122  | 4.47156  | 0.07591  |
| H | -0.46834 | 3.2239   | 0.85184  |
| H | 1.21505  | 3.44737  | 1.35342  |
| C | -0.15978 | 2.28288  | -1.60568 |
| H | -1.06082 | 1.92016  | -1.10266 |
| H | -0.39792 | 3.23245  | -2.09599 |
| H | 0.1185   | 1.55146  | -2.37154 |
| C | 2.5009   | -0.99295 | -0.3546  |
| C | 1.40751  | -1.87318 | -0.25525 |
| C | 3.8083   | -1.53287 | -0.26471 |
| C | 1.58818  | -3.24619 | -0.08922 |
| H | 0.38903  | -1.48813 | -0.31396 |
| C | 3.98144  | -2.91653 | -0.08526 |
| C | 2.88383  | -3.76867 | -0.00246 |
| H | 0.71977  | -3.89913 | -0.03288 |
| H | 4.99172  | -3.30722 | -0.01118 |
| H | 3.03623  | -4.83706 | 0.12939  |
| C | 4.98972  | -0.64169 | -0.32329 |
| H | 4.7639   | 0.41603  | -0.46835 |
| N | 6.18162  | -1.08407 | -0.21298 |
| C | 7.33938  | -0.17464 | -0.26868 |
| C | 8.07679  | -0.34412 | 1.074    |
| H | 9.01082  | 0.23017  | 1.07747  |
| H | 7.45289  | 0.00938  | 1.90377  |
| H | 8.31641  | -1.39809 | 1.25349  |
| C | 8.22854  | -0.69068 | -1.41674 |
| H | 7.71672  | -0.58169 | -2.3804  |
| H | 9.16849  | -0.12772 | -1.4608  |
| H | 8.46384  | -1.75138 | -1.27495 |
| C | 7.01616  | 1.31326  | -0.49566 |
| H | 7.94738  | 1.88913  | -0.53371 |
| H | 6.48716  | 1.47295  | -1.44271 |
| H | 6.40357  | 1.72561  | 0.31499  |

Thermal correction to Energy=0.761579

Thermal correction to Enthalpy=0.762729

Thermal correction to Gibbs Free Energy=0.596998

Sum of electronic and zero-point Energies=-1726.937878

Sum of electronic and thermal Energies=-1726.878222

Sum of electronic and thermal Enthalpies=-1726.877072

Sum of electronic and thermal Free Energies=-1727.042804

SCF Done: E(RM11L) = -1727.76233337

### TS8'

#### Number of Negative Frequencies =1

|    |          |          |          |
|----|----------|----------|----------|
| Ir | 0.31592  | -0.98888 | -0.1015  |
| B  | -1.95237 | -0.307   | -1.00216 |
| B  | -2.01438 | -0.63414 | 0.81763  |
| H  | 2.36675  | -3.25946 | -0.4186  |
| C  | 4.38584  | -2.47712 | -0.33226 |
| C  | 4.47175  | -0.08552 | 0.01052  |
| C  | 3.06105  | -0.07856 | 0.02151  |
| C  | 2.33159  | 1.13581  | 0.20133  |
| C  | 3.00357  | 2.36233  | 0.38955  |
| C  | 0.83967  | 3.41831  | 0.56108  |
| C  | 0.26453  | 2.14695  | 0.36001  |
| H  | -0.81043 | 2.03235  | 0.34192  |
| N  | 2.31833  | -1.22543 | -0.13534 |
| N  | 0.96743  | 1.02578  | 0.18428  |
| O  | -2.53205 | -1.16995 | -1.90568 |
| O  | -2.17273 | 1.01715  | -1.32089 |
| C  | 5.13684  | 1.1756   | 0.19457  |
| C  | 4.44005  | 2.33668  | 0.37681  |
| H  | 6.2207   | 1.20422  | 0.19151  |
| H  | 4.9852   | 3.26428  | 0.51352  |
| C  | 5.15567  | -1.32087 | -0.17725 |
| C  | 2.23101  | 3.54403  | 0.58044  |
| C  | -3.34968 | -0.3709  | -2.81542 |
| C  | -2.70527 | 1.05547  | -2.67829 |
| H  | -0.00983 | -2.57986 | -0.31998 |
| C  | -3.22418 | 0.18359  | 2.58314  |
| C  | 2.98278  | -2.37746 | -0.30218 |
| O  | -2.76802 | -1.70433 | 1.241    |
| O  | -2.14587 | 0.46532  | 1.64158  |
| C  | -3.26367 | -1.38782 | 2.57864  |
| C  | 4.99536  | -3.84366 | -0.53511 |
| H  | 5.65905  | -4.11501 | 0.29407  |
| H  | 4.21835  | -4.61068 | -0.6046  |
| H  | 5.58863  | -3.88476 | -1.45663 |
| C  | 6.66123  | -1.34858 | -0.19958 |
| H  | 7.07269  | -0.98854 | 0.75178  |
| H  | 7.05552  | -2.35045 | -0.37402 |

|                                                  |          |          |          |                                                          |
|--------------------------------------------------|----------|----------|----------|----------------------------------------------------------|
| H                                                | 7.05325  | -0.69305 | -0.9869  | Sum of electronic and zero-point Energies=-1655.893615   |
| C                                                | 2.92055  | 4.86695  | 0.79118  | Sum of electronic and thermal Energies=-1655.839028      |
| H                                                | 3.52932  | 5.13594  | -0.08154 | Sum of electronic and thermal Enthalpies=-1655.837878    |
| H                                                | 2.21364  | 5.67956  | 0.96519  | Sum of electronic and thermal Free Energies=-1655.985776 |
| H                                                | 3.59836  | 4.82421  | 1.65264  | SCF Done: E(RM11L)= -1656.66241202                       |
| C                                                | -0.09022 | 4.59356  | 0.7469   |                                                          |
| H                                                | 0.06338  | 5.08147  | 1.71702  | <b>g'</b>                                                |
| H                                                | 0.06115  | 5.35482  | -0.02804 | <b>Number of Negative Frequencies =0</b>                 |
| H                                                | -1.1353  | 4.2724   | 0.69843  | Ir                                                       |
| C                                                | -4.78435 | -0.44065 | -2.28244 | B                                                        |
| H                                                | -5.48212 | 0.09196  | -2.93697 | H                                                        |
| H                                                | -5.0932  | -1.48939 | -2.22715 | C                                                        |
| C                                                | -3.2701  | -0.98079 | -4.20963 | C                                                        |
| H                                                | -3.73755 | -1.97125 | -4.20791 | C                                                        |
| H                                                | -3.80405 | -0.35427 | -4.93321 | C                                                        |
| H                                                | -2.23541 | -1.09514 | -4.54082 | C                                                        |
| C                                                | -1.50938 | 1.27489  | -3.6116  | C                                                        |
| H                                                | -1.82792 | 1.37246  | -4.65473 | C                                                        |
| H                                                | -0.99583 | 2.1969   | -3.31931 | C                                                        |
| H                                                | -0.79235 | 0.45118  | -3.5357  | N                                                        |
| C                                                | -3.68384 | 2.21972  | -2.77916 | N                                                        |
| H                                                | -3.14471 | 3.16697  | -2.66892 | O                                                        |
| H                                                | -4.18004 | 2.22262  | -3.75602 | O                                                        |
| H                                                | -4.44698 | 2.17255  | -1.9984  | C                                                        |
| C                                                | -4.65234 | -1.99577 | 2.73808  | C                                                        |
| H                                                | -4.5831  | -3.08864 | 2.71642  | H                                                        |
| H                                                | -5.09066 | -1.70163 | 3.69829  | H                                                        |
| H                                                | -5.3255  | -1.68392 | 1.93569  | C                                                        |
| C                                                | -2.28275 | -2.02092 | 3.57075  | C                                                        |
| H                                                | -2.61116 | -1.87469 | 4.60514  | C                                                        |
| H                                                | -2.2245  | -3.09662 | 3.3758   | C                                                        |
| H                                                | -1.27804 | -1.6023  | 3.45442  | C                                                        |
| C                                                | -2.87749 | 0.81714  | 3.9254   | B                                                        |
| H                                                | -2.86907 | 1.90834  | 3.82865  | H                                                        |
| H                                                | -3.62321 | 0.54832  | 4.68199  | H                                                        |
| H                                                | -1.89247 | 0.50129  | 4.27723  | C                                                        |
| C                                                | -4.48694 | 0.82507  | 1.99805  | O                                                        |
| H                                                | -5.34217 | 0.71885  | 2.67339  | O                                                        |
| H                                                | -4.30253 | 1.89231  | 1.83717  | C                                                        |
| H                                                | -4.74527 | 0.37787  | 1.03297  | H                                                        |
| H                                                | -4.853   | -0.01481 | -1.27626 | H                                                        |
| Thermal correction to Energy=0.713859            |          |          |          | H                                                        |
| Thermal correction to Enthalpy=0.715009          |          |          |          | C                                                        |
| Thermal correction to Gibbs Free Energy=0.567111 |          |          |          | H                                                        |
|                                                  |          |          |          | 0.22186                                                  |
|                                                  |          |          |          | -0.35276                                                 |
|                                                  |          |          |          | -1.16574                                                 |
|                                                  |          |          |          | 2.22096                                                  |
|                                                  |          |          |          | 0.01433                                                  |
|                                                  |          |          |          | -1.03191                                                 |
|                                                  |          |          |          | 0.61014                                                  |
|                                                  |          |          |          | -1.68269                                                 |
|                                                  |          |          |          | -2.01958                                                 |
|                                                  |          |          |          | -2.77679                                                 |
|                                                  |          |          |          | -1.44163                                                 |
|                                                  |          |          |          | -1.82613                                                 |
|                                                  |          |          |          | -4.18432                                                 |
|                                                  |          |          |          | -1.49777                                                 |
|                                                  |          |          |          | -1.75873                                                 |
|                                                  |          |          |          | -4.08036                                                 |
|                                                  |          |          |          | 0.53089                                                  |
|                                                  |          |          |          | -0.44016                                                 |
|                                                  |          |          |          | -2.67113                                                 |
|                                                  |          |          |          | 0.48917                                                  |
|                                                  |          |          |          | -0.56363                                                 |
|                                                  |          |          |          | -1.85095                                                 |
|                                                  |          |          |          | 1.48838                                                  |
|                                                  |          |          |          | 0.07232                                                  |
|                                                  |          |          |          | -2.44756                                                 |
|                                                  |          |          |          | 2.52617                                                  |
|                                                  |          |          |          | 0.82707                                                  |
|                                                  |          |          |          | -0.22865                                                 |
|                                                  |          |          |          | 3.33904                                                  |
|                                                  |          |          |          | 1.33556                                                  |
|                                                  |          |          |          | 0.26807                                                  |
|                                                  |          |          |          | 2.26992                                                  |
|                                                  |          |          |          | 0.56452                                                  |
|                                                  |          |          |          | -2.03589                                                 |
|                                                  |          |          |          | -0.49522                                                 |
|                                                  |          |          |          | -1.25833                                                 |
|                                                  |          |          |          | -0.49637                                                 |
|                                                  |          |          |          | 1.37418                                                  |
|                                                  |          |          |          | -0.05752                                                 |
|                                                  |          |          |          | -0.13023                                                 |
|                                                  |          |          |          | -0.95222                                                 |
|                                                  |          |          |          | 1.73361                                                  |
|                                                  |          |          |          | 1.09161                                                  |
|                                                  |          |          |          | -2.60119                                                 |
|                                                  |          |          |          | 0.70738                                                  |
|                                                  |          |          |          | -4.65776                                                 |
|                                                  |          |          |          | 1.60718                                                  |
|                                                  |          |          |          | 0.31502                                                  |
|                                                  |          |          |          | -3.88124                                                 |
|                                                  |          |          |          | 2.55515                                                  |
|                                                  |          |          |          | 0.91556                                                  |
|                                                  |          |          |          | -5.73574                                                 |
|                                                  |          |          |          | 1.66543                                                  |
|                                                  |          |          |          | 0.41451                                                  |
|                                                  |          |          |          | -4.35902                                                 |
|                                                  |          |          |          | 3.34781                                                  |
|                                                  |          |          |          | 1.48025                                                  |
|                                                  |          |          |          | -4.85572                                                 |
|                                                  |          |          |          | -0.4943                                                  |
|                                                  |          |          |          | -1.05705                                                 |
|                                                  |          |          |          | -1.61012                                                 |
|                                                  |          |          |          | 3.48283                                                  |
|                                                  |          |          |          | 1.47131                                                  |
|                                                  |          |          |          | 1.13788                                                  |
|                                                  |          |          |          | -2.88516                                                 |
|                                                  |          |          |          | 2.12808                                                  |
|                                                  |          |          |          | -0.07609                                                 |
|                                                  |          |          |          | -2.05197                                                 |
|                                                  |          |          |          | 2.67095                                                  |
|                                                  |          |          |          | 4.31916                                                  |
|                                                  |          |          |          | 0.76543                                                  |
|                                                  |          |          |          | -1.69141                                                 |
|                                                  |          |          |          | 0.44661                                                  |
|                                                  |          |          |          | -1.37482                                                 |
|                                                  |          |          |          | 0.52538                                                  |
|                                                  |          |          |          | 1.33673                                                  |
|                                                  |          |          |          | 2.11362                                                  |
|                                                  |          |          |          | 0.4719                                                   |
|                                                  |          |          |          | -2.22705                                                 |
|                                                  |          |          |          | -2.20904                                                 |
|                                                  |          |          |          | -2.36217                                                 |
|                                                  |          |          |          | 4.3198                                                   |
|                                                  |          |          |          | 0.51402                                                  |
|                                                  |          |          |          | -0.1448                                                  |
|                                                  |          |          |          | 2.90491                                                  |
|                                                  |          |          |          | 0.40093                                                  |
|                                                  |          |          |          | 0.1408                                                   |
|                                                  |          |          |          | 3.12308                                                  |
|                                                  |          |          |          | 0.06676                                                  |
|                                                  |          |          |          | -2.11096                                                 |
|                                                  |          |          |          | -4.89469                                                 |
|                                                  |          |          |          | -2.64056                                                 |
|                                                  |          |          |          | -2.44279                                                 |
|                                                  |          |          |          | -4.178                                                   |
|                                                  |          |          |          | -3.30248                                                 |
|                                                  |          |          |          | -2.93849                                                 |
|                                                  |          |          |          | -5.46558                                                 |
|                                                  |          |          |          | -3.24415                                                 |
|                                                  |          |          |          | -1.72696                                                 |
|                                                  |          |          |          | -5.59916                                                 |
|                                                  |          |          |          | -2.28218                                                 |
|                                                  |          |          |          | -3.20271                                                 |
|                                                  |          |          |          | -6.35736                                                 |
|                                                  |          |          |          | -0.47417                                                 |
|                                                  |          |          |          | -0.93241                                                 |
|                                                  |          |          |          | -6.66282                                                 |
|                                                  |          |          |          | -0.50672                                                 |
|                                                  |          |          |          | 0.12065                                                  |

|                                         |          |          |          |                                                          |          |          |          |
|-----------------------------------------|----------|----------|----------|----------------------------------------------------------|----------|----------|----------|
| H                                       | -6.77341 | 0.44689  | -1.35903 | Thermal correction to Gibbs Free Energy=0.561717         |          |          |          |
| H                                       | -6.8266  | -1.31749 | -1.44049 | Sum of electronic and zero-point Energies=-1655.968212   |          |          |          |
| C                                       | -2.22439 | 4.59886  | 2.27615  | Sum of electronic and thermal Energies=-1655.912174      |          |          |          |
| H                                       | -2.8793  | 5.21835  | 1.65077  | Sum of electronic and thermal Enthalpies=-1655.911024    |          |          |          |
| H                                       | -2.84034 | 4.20099  | 3.09198  | Sum of electronic and thermal Free Energies=-1656.064914 |          |          |          |
| H                                       | -1.47122 | 5.2532   | 2.71687  | SCF Done: E(RM11L) = -1656.72343530                      |          |          |          |
| C                                       | 0.76438  | 4.27468  | 1.98207  |                                                          |          |          |          |
| H                                       | 0.64565  | 5.30326  | 1.62041  |                                                          |          |          |          |
| H                                       | 0.64656  | 4.29561  | 3.07182  | <b>TS10'</b>                                             |          |          |          |
| H                                       | 1.79031  | 3.96191  | 1.7649   | <b>Number of Negative Frequencies =1</b>                 |          |          |          |
| C                                       | 4.97527  | -0.81687 | 0.24481  | Ir                                                       | 0.39229  | 0.82935  | -0.38493 |
| H                                       | 4.78922  | -1.01097 | 1.3052   | H                                                        | 1.05302  | 0.03662  | -1.62625 |
| H                                       | 4.54915  | -1.64475 | -0.33061 | C                                                        | -0.13093 | 2.10803  | -3.20959 |
| H                                       | 6.05892  | -0.7977  | 0.08411  | C                                                        | -0.54504 | 3.07176  | -4.14845 |
| C                                       | 4.90268  | 1.64724  | 0.69551  | C                                                        | -1.25639 | 4.42889  | -2.27978 |
| H                                       | 4.84276  | 1.38855  | 1.75887  | C                                                        | -0.81804 | 3.3948   | -1.42144 |
| H                                       | 5.95731  | 1.81648  | 0.44791  | C                                                        | -0.95681 | 3.50215  | -0.00017 |
| H                                       | 4.35769  | 2.5834   | 0.54705  | C                                                        | -1.51774 | 4.66755  | 0.57177  |
| C                                       | 4.13032  | 2.2448   | -2.05592 | N                                                        | -0.25686 | 2.24418  | -1.88699 |
| H                                       | 5.02316  | 2.83958  | -1.83352 | C                                                        | -1.81173 | 5.60472  | -1.67155 |
| H                                       | 3.92436  | 2.32314  | -3.12891 | C                                                        | -1.93179 | 5.71749  | -0.31702 |
| H                                       | 3.28009  | 2.67576  | -1.51607 | H                                                        | -2.14118 | 6.42224  | -2.30265 |
| C                                       | 5.51829  | 0.1922   | -2.44107 | H                                                        | -2.36127 | 6.62054  | 0.10157  |
| H                                       | 5.43389  | 0.42081  | -3.50962 | C                                                        | -1.12536 | 4.25648  | -3.68746 |
| H                                       | 6.45375  | 0.63062  | -2.07382 | C                                                        | 2.36545  | -3.0306  | -0.99889 |
| H                                       | 5.57539  | -0.89383 | -2.33413 | B                                                        | 1.05911  | -1.13846 | -0.6492  |
| C                                       | 1.02723  | -4.39247 | 2.33582  | H                                                        | 0.32552  | 1.18511  | -3.54911 |
| H                                       | 1.91348  | -4.89078 | 1.92698  | C                                                        | 0.83991  | -3.37777 | -1.19575 |
| H                                       | 0.96568  | -4.6344  | 3.40355  | O                                                        | 0.17353  | -2.2203  | -0.62791 |
| H                                       | 0.14846  | -4.80485 | 1.83325  | O                                                        | 2.3522   | -1.58677 | -0.95426 |
| C                                       | -1.41272 | -2.79882 | 2.56212  | C                                                        | 0.41953  | -3.4512  | -2.66927 |
| H                                       | -1.48517 | -3.61909 | 3.28471  | H                                                        | 0.84197  | -4.32738 | -3.17313 |
| H                                       | -2.2298  | -2.09532 | 2.7565   | H                                                        | -0.67243 | -3.51629 | -2.72392 |
| H                                       | -1.55057 | -3.20649 | 1.55491  | H                                                        | 0.73015  | -2.55246 | -3.21253 |
| C                                       | 0.10148  | -1.49355 | 4.07965  | C                                                        | 0.36405  | -4.62334 | -0.45366 |
| H                                       | -0.78983 | -0.9251  | 4.36923  | H                                                        | -0.70503 | -4.77878 | -0.6369  |
| H                                       | 0.23772  | -2.30266 | 4.80686  | H                                                        | 0.90076  | -5.5136  | -0.8013  |
| H                                       | 0.96226  | -0.82236 | 4.13892  | H                                                        | 0.50972  | -4.52704 | 0.62506  |
| C                                       | 2.48879  | -2.37673 | 2.64586  | C                                                        | 2.9421   | -3.52645 | 0.33072  |
| H                                       | 3.29004  | -2.87267 | 2.08883  | H                                                        | 3.00984  | -4.61917 | 0.36534  |
| H                                       | 2.58441  | -1.29951 | 2.48273  | H                                                        | 3.94695  | -3.11181 | 0.46107  |
| H                                       | 2.62508  | -2.59363 | 3.71131  | H                                                        | 2.33409  | -3.18021 | 1.16668  |
|                                         |          |          |          | C                                                        | 3.27367  | -3.46761 | -2.14765 |
| Thermal correction to Energy=0.714457   |          |          |          | H                                                        | 4.30621  | -3.17056 | -1.93258 |
| Thermal correction to Enthalpy=0.715607 |          |          |          |                                                          |          |          |          |

|   |          |          |          |                                                          |          |          |          |
|---|----------|----------|----------|----------------------------------------------------------|----------|----------|----------|
| H | 3.25399  | -4.55667 | -2.27113 | Thermal correction to Energy= 0.714496                   |          |          |          |
| H | 2.98128  | -3.00401 | -3.09316 | Thermal correction to Enthalpy=0.715646                  |          |          |          |
| C | -0.72363 | 2.52079  | 2.07229  | Thermal correction to Gibbs Free Energy=0.567206         |          |          |          |
| C | -1.65528 | 4.74813  | 1.98608  | Sum of electronic and zero-point Energies= -1655.933823  |          |          |          |
| C | -1.26126 | 3.64035  | 2.73615  | Sum of electronic and thermal Energies=-1655.878847      |          |          |          |
| H | -0.43776 | 1.64702  | 2.64     | Sum of electronic and thermal Enthalpies=-1655.877697    |          |          |          |
| N | -0.5437  | 2.43208  | 0.75121  | Sum of electronic and thermal Free Energies=-1656.025693 |          |          |          |
| C | -1.37002 | 3.59329  | 4.24123  | SCF Done: E(RM11L) = -1656.68761988                      |          |          |          |
| H | -0.71473 | 4.33634  | 4.7124   |                                                          |          |          |          |
| H | -2.39219 | 3.7977   | 4.5794   | <b>2a'</b>                                               |          |          |          |
| H | -1.08228 | 2.60932  | 4.62197  | <b>Number of Negative Frequencies =0</b>                 |          |          |          |
| C | -2.2247  | 5.98777  | 2.62455  | Ir                                                       | -0.69921 | -0.19664 | -0.03912 |
| H | -1.72563 | 6.88956  | 2.25256  | B                                                        | 0.7682   | 1.23353  | -0.12337 |
| H | -3.29285 | 6.09129  | 2.39221  | O                                                        | 1.70676  | 1.35906  | -1.16779 |
| H | -2.12177 | 5.97551  | 3.71051  | O                                                        | 0.98888  | 2.28582  | 0.79528  |
| C | -0.33044 | 2.78278  | -5.61453 | C                                                        | -4.66164 | 1.30695  | 0.05662  |
| H | 0.17819  | 1.82388  | -5.75306 | C                                                        | -3.25109 | 3.23788  | 0.30518  |
| H | -1.28102 | 2.73783  | -6.15982 | C                                                        | -2.14423 | 2.37941  | 0.25287  |
| H | 0.28152  | 3.55885  | -6.08884 | H                                                        | -1.1457  | 2.77522  | 0.36199  |
| C | -1.59751 | 5.33461  | -4.62828 | C                                                        | -4.86611 | -1.55605 | -0.15132 |
| H | -2.62572 | 5.63725  | -4.3989  | N                                                        | -2.4304  | -1.61063 | -0.09996 |
| H | -0.96995 | 6.23121  | -4.54132 | N                                                        | -2.21866 | 1.03878  | 0.08823  |
| H | -1.57402 | 5.01134  | -5.66994 | C                                                        | -3.60477 | -0.918   | -0.08414 |
| C | 2.16489  | -0.52675 | 3.33011  | C                                                        | -3.49859 | 0.50282  | 0.01735  |
| C | 0.68493  | -1.01757 | 3.528    | C                                                        | -6.03255 | -0.72111 | -0.12547 |
| B | 0.96101  | -0.12268 | 1.38898  | C                                                        | -5.93159 | 0.63636  | -0.02697 |
| O | 0.01606  | -0.43406 | 2.38083  | H                                                        | -7.01437 | -1.1778  | -0.18256 |
| O | 2.24413  | -0.33273 | 1.89561  | H                                                        | -6.8379  | 1.23134  | -0.00542 |
| C | 0.0067   | -0.52045 | 4.80312  | C                                                        | -4.91447 | -2.97606 | -0.23856 |
| H | -1.03245 | -0.86682 | 4.82656  | C                                                        | -4.54322 | 2.71721  | 0.18739  |
| H | 0.5157   | -0.91334 | 5.69097  | C                                                        | 2.69227  | 2.36221  | -0.82329 |
| H | -0.00252 | 0.56989  | 4.8673   | C                                                        | 1.92881  | 3.23354  | 0.23429  |
| C | 2.44009  | 0.83782  | 3.97728  | C                                                        | -3.70256 | -3.67239 | -0.25782 |
| H | 2.44594  | 0.7776   | 5.07108  | C                                                        | 3.9067   | 1.6295   | -0.24139 |
| H | 3.42073  | 1.19641  | 3.64675  | H                                                        | 3.64199  | 1.067    | 0.65871  |
| H | 1.69467  | 1.5793   | 3.67104  | H                                                        | 4.27437  | 0.91407  | -0.98217 |
| C | 0.51192  | -2.53668 | 3.4227   | H                                                        | 4.72082  | 2.32073  | 0.00225  |
| H | 0.97533  | -3.05963 | 4.26609  | C                                                        | 3.10189  | 3.10394  | -2.09424 |
| H | -0.55775 | -2.77212 | 3.41636  | H                                                        | 3.78518  | 3.92992  | -1.86342 |
| H | 0.93793  | -2.91912 | 2.49262  | H                                                        | 3.62008  | 2.41698  | -2.77313 |
| C | 3.23692  | -1.52589 | 3.75535  | H                                                        | 2.2347   | 3.50681  | -2.62378 |
| H | 4.23015  | -1.11131 | 3.55058  | C                                                        | 1.11056  | 4.36916  | -0.39661 |
| H | 3.17061  | -1.73158 | 4.8302   | H                                                        | 0.47465  | 4.82039  | 0.37305  |
| H | 3.14972  | -2.46996 | 3.21387  | H                                                        | 1.75285  | 5.15493  | -0.80966 |

|   |          |          |          |
|---|----------|----------|----------|
| H | 0.46231  | 3.994    | -1.19544 |
| C | 2.79843  | 3.78965  | 1.35925  |
| H | 3.57597  | 4.45382  | 0.96314  |
| H | 2.18042  | 4.37026  | 2.05382  |
| H | 3.27954  | 2.98954  | 1.92724  |
| C | -3.62259 | -5.17706 | -0.35235 |
| H | -4.09999 | -5.54893 | -1.26687 |
| H | -2.58042 | -5.51122 | -0.36185 |
| H | -4.12032 | -5.66329 | 0.49536  |
| C | -6.2458  | -3.67934 | -0.30464 |
| H | -6.85879 | -3.44284 | 0.57405  |
| H | -6.81456 | -3.36089 | -1.18732 |
| H | -6.13901 | -4.76397 | -0.35191 |
| C | -5.77321 | 3.58811  | 0.21291  |
| H | -6.3914  | 3.42523  | -0.6786  |
| H | -6.40222 | 3.36379  | 1.0846   |
| H | -5.52476 | 4.64994  | 0.25131  |
| C | -2.98334 | 4.71368  | 0.48727  |
| H | -3.35894 | 5.29781  | -0.36158 |
| H | -3.47002 | 5.10046  | 1.39058  |
| H | -1.91055 | 4.90824  | 0.57527  |
| C | -2.50226 | -2.93785 | -0.18848 |
| H | -1.55521 | -3.46739 | -0.20462 |
| C | 1.94968  | -2.20839 | 2.02245  |
| C | 3.22633  | -1.89503 | 1.57132  |
| C | 0.97603  | -2.67154 | 1.12309  |
| C | 3.55489  | -2.03187 | 0.20908  |
| C | 1.28775  | -2.79124 | -0.2373  |
| H | -0.0097  | -2.94597 | 1.48615  |
| C | 2.57204  | -2.46942 | -0.68862 |
| H | 0.54659  | -3.15493 | -0.94298 |
| H | 2.81598  | -2.56898 | -1.74391 |
| H | 1.70495  | -2.10523 | 3.07608  |
| C | 4.91048  | -1.73393 | -0.29501 |
| H | 5.03851  | -1.88618 | -1.37412 |
| N | 5.84539  | -1.33276 | 0.47274  |
| C | 7.19896  | -1.04426 | -0.02979 |
| C | 8.14398  | -1.98302 | 0.74579  |
| H | 8.01195  | -1.85705 | 1.82616  |
| H | 7.93764  | -3.0309  | 0.4973   |
| H | 9.18971  | -1.76887 | 0.49572  |
| C | 7.49597  | 0.41829  | 0.35462  |
| H | 7.31706  | 0.58012  | 1.42327  |
| H | 8.54064  | 0.66795  | 0.13406  |

|   |         |          |          |
|---|---------|----------|----------|
| H | 6.853   | 1.10485  | -0.20701 |
| C | 7.40928 | -1.2327  | -1.54153 |
| H | 8.44424 | -0.98488 | -1.80198 |
| H | 7.22871 | -2.26873 | -1.85231 |
| H | 6.75425 | -0.57784 | -2.12861 |
| H | 3.99047 | -1.54713 | 2.2594   |

Thermal correction to Energy=0.764554

Thermal correction to Enthalpy=0.765704

Thermal correction to Gibbs Free Energy=0.603837

Sum of electronic and zero-point Energies=-1726.937400

Sum of electronic and thermal Energies=-1726.878187

Sum of electronic and thermal Enthalpies=-1726.877037

Sum of electronic and thermal Free Energies=-1727.038904

SCF Done: E(RM11L) = -1727.75617711

**TS3a'**

**Number of Negative Frequencies =1**

|   |          |          |          |
|---|----------|----------|----------|
| B | 0.17386  | 2.04673  | -0.37942 |
| C | -4.6426  | -0.30185 | 0.73269  |
| C | -5.1725  | 1.01697  | 0.82255  |
| C | -4.33204 | 2.07654  | 0.48047  |
| C | -3.00829 | 1.79997  | 0.09445  |
| C | 1.62366  | 3.78166  | 0.16475  |
| C | 0.22052  | 4.36868  | -0.21646 |
| N | -2.48343 | 0.5714   | 0.00409  |
| O | 1.3166   | 2.3797   | 0.36573  |
| O | -0.41573 | 3.23173  | -0.8575  |
| C | 1.37005  | -0.70411 | -1.16821 |
| C | 1.4653   | -1.76399 | -2.10157 |
| C | 2.61185  | -2.56123 | -2.1845  |
| H | 2.64472  | -3.38171 | -2.89786 |
| C | 3.71019  | -2.30646 | -1.36802 |
| H | 4.60721  | -2.91545 | -1.42389 |
| C | 3.67205  | -1.21904 | -0.47619 |
| C | 2.52388  | -0.4181  | -0.4039  |
| C | -0.62822 | 4.73424  | 1.00805  |
| H | -1.65095 | 4.95609  | 0.68418  |
| H | -0.6697  | 3.90319  | 1.71983  |
| H | -0.23643 | 5.61769  | 1.52338  |
| C | 0.25234  | 5.53453  | -1.19978 |
| H | -0.76949 | 5.86637  | -1.41598 |
| H | 0.80248  | 6.38398  | -0.77841 |
| H | 0.71999  | 5.25002  | -2.14556 |
| C | 2.23459  | 4.34203  | 1.44532  |
| H | 3.20141  | 3.86217  | 1.63506  |

|    |          |          |          |
|----|----------|----------|----------|
| H  | 2.40507  | 5.42132  | 1.35657  |
| H  | 1.59333  | 4.15984  | 2.31144  |
| C  | 2.64067  | 3.85782  | -0.98143 |
| H  | 2.9749   | 4.88495  | -1.16399 |
| H  | 3.51584  | 3.25249  | -0.72163 |
| H  | 2.2188   | 3.45662  | -1.90896 |
| H  | 0.62183  | -1.96775 | -2.75673 |
| H  | 0.70811  | 0.33546  | -1.72885 |
| C  | -6.59531 | 1.23167  | 1.26769  |
| H  | -6.75213 | 0.84181  | 2.28118  |
| H  | -6.87134 | 2.28683  | 1.27115  |
| H  | -7.29623 | 0.70465  | 0.60868  |
| C  | 4.8259   | -0.87558 | 0.37621  |
| H  | 4.67308  | 0.00955  | 1.0115   |
| C  | 7.03445  | -1.12675 | 1.24562  |
| Ir | -0.50138 | 0.14246  | -0.62528 |
| C  | -3.30544 | -0.48427 | 0.3059   |
| C  | -2.7668  | -1.80887 | 0.16571  |
| C  | -5.40963 | -1.47145 | 1.06004  |
| C  | -4.88562 | -2.72708 | 0.96072  |
| C  | -3.54179 | -2.94325 | 0.50606  |
| C  | -2.95842 | -4.23768 | 0.38036  |
| C  | -1.64119 | -4.32101 | -0.07277 |
| C  | -0.96388 | -3.12631 | -0.3927  |
| N  | -1.49263 | -1.91125 | -0.29993 |
| H  | -5.49951 | -3.58019 | 1.22678  |
| H  | -2.34071 | 2.61133  | -0.16433 |
| C  | -0.90788 | -5.6299  | -0.23871 |
| H  | 0.1082   | -5.46209 | -0.60907 |
| H  | -0.83088 | -6.17297 | 0.71077  |
| H  | -1.41838 | -6.28938 | -0.95088 |
| C  | -3.75865 | -5.46065 | 0.74625  |
| H  | -4.67027 | -5.52938 | 0.14004  |
| H  | -3.19333 | -6.38234 | 0.6032   |
| H  | -4.07367 | -5.42038 | 1.79631  |
| H  | 0.06115  | -3.17006 | -0.74402 |
| H  | 2.5121   | 0.44423  | 0.25481  |
| N  | 5.91118  | -1.54661 | 0.37113  |
| C  | 6.60051  | -1.06761 | 2.72269  |
| H  | 6.17284  | -2.02732 | 3.03606  |
| H  | 7.46247  | -0.85051 | 3.36453  |
| H  | 5.85076  | -0.2877  | 2.89631  |
| C  | 8.1303   | -2.19153 | 1.07501  |
| H  | 9.01214  | -1.95168 | 1.68102  |

|   |          |          |          |
|---|----------|----------|----------|
| H | 7.76021  | -3.1775  | 1.38062  |
| H | 8.4396   | -2.25887 | 0.02533  |
| C | 7.56794  | 0.24316  | 0.78584  |
| H | 7.84453  | 0.21252  | -0.27469 |
| H | 6.8152   | 1.02876  | 0.91777  |
| H | 8.45612  | 0.52449  | 1.36402  |
| C | -4.77159 | 3.52082  | 0.51728  |
| H | -5.62081 | 3.69929  | -0.15282 |
| H | -5.08073 | 3.82308  | 1.52503  |
| H | -3.95719 | 4.18217  | 0.20634  |
| H | -6.43187 | -1.35093 | 1.40001  |

Thermal correction to Energy= 0.759422

Thermal correction to Enthalpy= 0.760572

Thermal correction to Gibbs Free Energy= 0.598654

Sum of electronic and zero-point Energies= -1726.938636

Sum of electronic and thermal Energies= -1726.879599

Sum of electronic and thermal Enthalpies= -1726.878449

Sum of electronic and thermal Free Energies= -1727.040366

SCF Done: E(RM11L) = -1727.74969915

**4a'**

**Number of Negative Frequencies =0**

|    |          |          |          |
|----|----------|----------|----------|
| Ir | -0.73884 | -1.72224 | -0.30824 |
| B  | 1.15494  | -2.4027  | 0.02782  |
| C  | -2.2609  | 1.505    | 2.35373  |
| C  | -0.16141 | 0.84753  | 3.35405  |
| C  | -0.06147 | -0.12554 | 2.34149  |
| H  | 0.79923  | -0.78413 | 2.29475  |
| C  | -4.21618 | 1.12444  | 0.28701  |
| N  | -2.85392 | -0.69437 | -0.55916 |
| N  | -0.96426 | -0.30975 | 1.37892  |
| O  | 1.79904  | -2.35609 | 1.28383  |
| O  | 2.05603  | -2.90082 | -0.91886 |
| C  | -3.06657 | 0.29791  | 0.34465  |
| C  | -2.07263 | 0.49429  | 1.37691  |
| C  | -4.3689  | 2.14189  | 1.28705  |
| C  | -3.4408  | 2.31931  | 2.26983  |
| H  | -5.24094 | 2.78559  | 1.26078  |
| H  | -3.59502 | 3.10069  | 3.0051   |
| C  | -5.16657 | 0.91244  | -0.75532 |
| C  | -1.27467 | 1.68646  | 3.36697  |
| C  | 3.24977  | -3.37206 | -0.24833 |
| C  | 3.22278  | -2.55527 | 1.08888  |
| H  | -0.73027 | -2.72831 | -1.57526 |



|   |          |          |          |
|---|----------|----------|----------|
| C | -4.92265 | -0.10851 | -1.67499 |
| C | 4.45796  | -3.10452 | -1.14157 |
| H | 5.3898   | -3.36733 | -0.627   |
| H | 4.38996  | -3.71312 | -2.05026 |
| H | 4.50867  | -2.05572 | -1.44477 |
| C | 3.07939  | -4.88107 | -0.0307  |
| H | 2.22071  | -5.08873 | 0.61644  |
| H | 2.89844  | -5.36175 | -0.99808 |
| H | 3.97179  | -5.33331 | 0.4159   |
| C | 3.79349  | -3.2738  | 2.30757  |
| H | 4.85496  | -3.50552 | 2.16127  |
| H | 3.70719  | -2.63015 | 3.19075  |
| H | 3.25908  | -4.20399 | 2.51713  |
| C | 3.86085  | -1.16621 | 0.9517   |
| H | 4.95114  | -1.22886 | 0.86754  |
| H | 3.47265  | -0.64066 | 0.0745   |
| H | 3.62061  | -0.57026 | 1.83944  |
| C | -5.85052 | -0.42433 | -2.82296 |
| H | -5.95591 | 0.43121  | -3.50079 |
| H | -5.47095 | -1.26749 | -3.40834 |
| H | -6.85476 | -0.68768 | -2.4703  |
| C | -6.38831 | 1.78966  | -0.84282 |
| H | -6.97933 | 1.73268  | 0.07931  |
| H | -6.10375 | 2.84036  | -0.97935 |
| H | -7.03898 | 1.51144  | -1.67272 |
| C | -1.45048 | 2.7639   | 4.40565  |
| H | -1.47205 | 3.75652  | 3.93863  |
| H | -2.39844 | 2.64102  | 4.94326  |
| H | -0.64707 | 2.76015  | 5.14347  |
| C | 0.95648  | 0.94492  | 4.36389  |
| H | 1.42488  | 1.93624  | 4.35011  |
| H | 0.59658  | 0.76841  | 5.38462  |
| H | 1.7355   | 0.20551  | 4.15358  |
| C | -3.75062 | -0.8773  | -1.52117 |
| H | -3.53171 | -1.67703 | -2.22238 |
| C | 1.02422  | 0.63088  | -0.91597 |
| C | 0.07835  | -0.28165 | -1.43247 |
| C | -0.32195 | -0.07226 | -2.77062 |
| C | 0.18789  | 0.98721  | -3.53444 |
| C | 1.1183   | 1.87347  | -2.99949 |
| C | 1.54418  | 1.69252  | -1.67268 |
| H | -1.04058 | -0.74853 | -3.22573 |
| H | -0.14752 | 1.1115   | -4.5625  |
| H | 1.52202  | 2.69383  | -3.58492 |

|   |         |         |          |
|---|---------|---------|----------|
| C | 2.53171 | 2.5864  | -1.03771 |
| H | 2.77547 | 2.32563 | 0.00117  |
| N | 3.05699 | 3.57656 | -1.64658 |
| C | 4.03976 | 4.45886 | -0.99589 |
| C | 4.41736 | 4.0968  | 0.45085  |
| H | 3.54983 | 4.13326 | 1.12074  |
| H | 4.85972 | 3.09544 | 0.51682  |
| H | 5.15676 | 4.81175 | 0.82861  |
| C | 5.29963 | 4.41734 | -1.88285 |
| H | 5.73968 | 3.41296 | -1.88185 |
| H | 5.05054 | 4.67793 | -2.91756 |
| H | 6.05431 | 5.12421 | -1.51784 |
| C | 3.42924 | 5.87373 | -1.03314 |
| H | 2.52331 | 5.92089 | -0.41669 |
| H | 4.14328 | 6.6141  | -0.65315 |
| H | 3.15653 | 6.14766 | -2.05845 |
| H | 1.37783 | 0.51317 | 0.10475  |

Thermal correction to Energy=0.760782

Thermal correction to Enthalpy=0.761932

Thermal correction to Gibbs Free Energy=0.599009

Sum of electronic and zero-point Energies=-1726.978530

Sum of electronic and thermal Energies=-1726.919083

Sum of electronic and thermal Enthalpies=-1726.917933

Sum of electronic and thermal Free Energies=-1727.080856

SCF Done: E(RM11L) = -1727.78521344

**TS5a'**

**Number of Negative Frequencies =1**

|    |          |          |          |
|----|----------|----------|----------|
| Ir | 0.24336  | 0.26635  | 0.55529  |
| B  | 1.03778  | -1.38066 | -0.61011 |
| C  | -4.12675 | -0.21922 | 0.66629  |
| C  | -3.39487 | -2.44767 | 1.23161  |
| C  | -2.0732  | -1.97583 | 1.10217  |
| H  | -1.25156 | -2.66834 | 1.22105  |
| C  | -3.38383 | 2.43367  | -0.16128 |
| N  | -1.05577 | 1.72264  | 0.01949  |
| N  | -1.73961 | -0.72368 | 0.79618  |
| O  | 0.20119  | -2.52808 | -0.72736 |
| O  | 1.63164  | -1.11684 | -1.87055 |
| C  | -2.39992 | 1.46538  | 0.14063  |
| C  | -2.76455 | 0.14672  | 0.55575  |
| C  | -4.75937 | 2.04609  | -0.00885 |
| C  | -5.11182 | 0.78692  | 0.38343  |
| H  | -5.53722 | 2.77101  | -0.22053 |

|   |          |          |          |
|---|----------|----------|----------|
| H | -6.16319 | 0.53687  | 0.47329  |
| C | -2.97822 | 3.72226  | -0.60854 |
| C | -4.45079 | -1.55593 | 1.03229  |
| C | 0.8788   | -1.83937 | -2.8637  |
| C | 0.36053  | -3.07715 | -2.04684 |
| H | 1.50008  | 1.22511  | 0.28705  |
| C | -1.60637 | 3.96462  | -0.73409 |
| C | 1.80504  | -2.17854 | -4.02892 |
| H | 1.29258  | -2.8078  | -4.76614 |
| H | 2.12168  | -1.25765 | -4.53144 |
| H | 2.70375  | -2.69955 | -3.68822 |
| C | -0.2582  | -0.92443 | -3.34233 |
| H | -0.92486 | -0.6703  | -2.51258 |
| H | 0.17447  | 0.00834  | -3.72012 |
| H | -0.84326 | -1.38513 | -4.14596 |
| C | -0.98141 | -3.63985 | -2.50978 |
| H | -0.92491 | -3.99048 | -3.54705 |
| H | -1.26402 | -4.49147 | -1.8798  |
| H | -1.77418 | -2.89097 | -2.43504 |
| C | 1.40229  | -4.20075 | -1.95102 |
| H | 1.53358  | -4.72501 | -2.90424 |
| H | 2.3717   | -3.80381 | -1.63236 |
| H | 1.07086  | -4.92841 | -1.20192 |
| C | -1.05059 | 5.28418  | -1.21414 |
| H | -1.35608 | 6.1109   | -0.56186 |
| H | 0.04316  | 5.26234  | -1.23535 |
| H | -1.39973 | 5.51959  | -2.22658 |
| C | -4.01242 | 4.76648  | -0.93812 |
| H | -4.67416 | 4.42447  | -1.744   |
| H | -4.64859 | 4.97832  | -0.06962 |
| H | -3.56211 | 5.70774  | -1.2559  |
| C | -5.8924  | -1.9729  | 1.16757  |
| H | -6.42197 | -1.32884 | 1.87986  |
| H | -6.4167  | -1.88885 | 0.20708  |
| H | -5.99404 | -3.00286 | 1.51252  |
| C | -3.60448 | -3.90268 | 1.57545  |
| H | -4.14402 | -4.0213  | 2.52283  |
| H | -4.18621 | -4.41795 | 0.80176  |
| H | -2.64558 | -4.42117 | 1.67203  |
| C | -0.69683 | 2.94577  | -0.40818 |
| H | 0.36757  | 3.11543  | -0.50169 |
| C | 1.47655  | -1.89745 | 1.95267  |
| C | 1.95294  | -1.28029 | 0.77439  |
| C | 3.31397  | -0.82497 | 0.78884  |

|   |         |          |          |
|---|---------|----------|----------|
| C | 4.12279 | -1.07554 | 1.89437  |
| C | 3.60148 | -1.66017 | 3.0588   |
| C | 2.27014 | -2.0503  | 3.10039  |
| H | 1.85451 | -2.51047 | 3.99311  |
| H | 4.24812 | -1.8138  | 3.91922  |
| H | 0.48377 | -2.32801 | 1.95726  |
| C | 5.61082 | -0.68206 | 1.84389  |
| H | 6.1931  | -1.42317 | 2.35046  |
| N | 5.79595 | 0.61988  | 2.50082  |
| C | 7.21683 | 0.99399  | 2.45545  |
| C | 7.9707  | 0.2862   | 3.59664  |
| H | 8.14448 | -0.73527 | 3.32962  |
| H | 8.90752 | 0.77578  | 3.76272  |
| H | 7.3839  | 0.32633  | 4.49048  |
| C | 7.35157 | 2.51926  | 2.61971  |
| H | 7.55107 | 2.96431  | 1.66733  |
| H | 6.44061 | 2.91721  | 3.01556  |
| H | 8.15663 | 2.73603  | 3.29037  |
| C | 7.81675 | 0.56841  | 1.10246  |
| H | 7.21183 | -0.20116 | 0.67033  |
| H | 7.84552 | 1.41139  | 0.44409  |
| H | 8.80974 | 0.1993   | 1.25289  |
| H | 3.76281 | -0.38861 | -0.07893 |

Thermal correction to Energy=0.759931

Thermal correction to Enthalpy=0.761081

Thermal correction to Gibbs Free Energy=0.602907

Sum of electronic and zero-point Energies=-1726.951996

Sum of electronic and thermal Energies=-1726.893746

Sum of electronic and thermal Enthalpies=-1726.892596

Sum of electronic and thermal Free Energies=-1727.050770

SCF Done: E(RM11L) = -1727.76592465

**6a'**

**Number of Negative Frequencies =0**

|   |          |          |          |
|---|----------|----------|----------|
| C | -1.06831 | 3.14216  | 0.91182  |
| H | -0.02336 | 3.33373  | 1.11288  |
| C | -2.0535  | 4.03854  | 1.35194  |
| C | -3.70686 | 2.59202  | 0.36573  |
| C | -2.66061 | 1.73881  | -0.04267 |
| C | -2.92439 | 0.53757  | -0.75836 |
| C | -4.24733 | 0.1536   | -1.0892  |
| C | -3.3004  | -1.81107 | -2.12901 |
| C | -2.03288 | -1.34152 | -1.74915 |
| H | -1.15487 | -1.93135 | -1.97146 |

|    |          |          |          |                                                           |          |          |          |
|----|----------|----------|----------|-----------------------------------------------------------|----------|----------|----------|
| N  | -1.32761 | 2.00338  | 0.22932  | H                                                         | -2.75597 | -2.35736 | 0.6951   |
| N  | -1.82119 | -0.20279 | -1.08391 | H                                                         | -2.74604 | -2.40804 | 2.46776  |
| C  | -5.04361 | 2.18934  | 0.01889  | H                                                         | -1.68859 | -1.26924 | 1.59141  |
| C  | -5.30068 | 1.03769  | -0.66825 | C                                                         | 1.88823  | -1.76219 | -0.32192 |
| H  | -5.87322 | 2.82211  | 0.31445  | C                                                         | 1.65888  | -1.72667 | -1.71136 |
| H  | -6.32954 | 0.78849  | -0.90068 | C                                                         | 3.0705   | -1.16524 | 0.162    |
| C  | -3.40367 | 3.7788   | 1.08547  | C                                                         | 2.56893  | -1.10522 | -2.57842 |
| C  | -4.43921 | -1.06341 | -1.80063 | H                                                         | 0.77861  | -2.20817 | -2.12285 |
| Ir | -0.01538 | 0.70263  | -0.37761 | C                                                         | 3.9921   | -0.55286 | -0.69246 |
| O  | -0.24103 | -3.10858 | 0.3057   | C                                                         | 3.72639  | -0.52215 | -2.07487 |
| H  | 1.28618  | 1.53247  | 0.19384  | H                                                         | 2.37107  | -1.08577 | -3.647   |
| C  | -3.40106 | -3.12198 | -2.86629 | H                                                         | 4.43809  | -0.03559 | -2.73481 |
| H  | -3.89951 | -3.00076 | -3.83612 | C                                                         | 5.19793  | 0.07936  | -0.11998 |
| H  | -2.41085 | -3.55172 | -3.04655 | H                                                         | 5.27238  | 0.01066  | 0.97256  |
| H  | -3.98668 | -3.85543 | -2.29689 | N                                                         | 6.06476  | 0.66612  | -0.84718 |
| C  | -5.79635 | -1.57064 | -2.21293 | C                                                         | 7.25054  | 1.32238  | -0.27128 |
| H  | -5.96786 | -2.58132 | -1.82186 | C                                                         | 7.17551  | 2.79352  | -0.72529 |
| H  | -6.61767 | -0.93995 | -1.87081 | H                                                         | 6.30486  | 3.29085  | -0.28156 |
| H  | -5.86427 | -1.64234 | -3.30628 | H                                                         | 8.07652  | 3.33846  | -0.41956 |
| C  | -4.51099 | 4.69964  | 1.52998  | H                                                         | 7.08418  | 2.85619  | -1.81532 |
| H  | -5.09464 | 5.05997  | 0.67323  | C                                                         | 8.47146  | 0.64266  | -0.92172 |
| H  | -5.2111  | 4.18351  | 2.19946  | H                                                         | 8.53863  | -0.4082  | -0.61579 |
| H  | -4.1319  | 5.57424  | 2.0608   | H                                                         | 8.39421  | 0.67489  | -2.01426 |
| C  | -1.59898 | 5.26365  | 2.11069  | H                                                         | 9.3978   | 1.14761  | -0.6236  |
| H  | -1.89796 | 6.18656  | 1.5994   | C                                                         | 7.37634  | 1.25966  | 1.25987  |
| H  | -2.03139 | 5.29367  | 3.11807  | H                                                         | 8.28605  | 1.78261  | 1.57521  |
| H  | -0.51    | 5.27816  | 2.21528  | H                                                         | 6.52672  | 1.74179  | 1.75774  |
| B  | 0.85844  | -2.37208 | 0.67703  | H                                                         | 7.44604  | 0.22647  | 1.6205   |
| O  | 1.0145   | -2.26962 | 2.03833  | H                                                         | 3.26096  | -1.17112 | 1.23269  |
| C  | -1.0253  | -3.3461  | 1.5182   | Thermal correction to Energy= 0.762239                    |          |          |          |
| C  | 0.05806  | -3.18446 | 2.65047  | Thermal correction to Enthalpy=0.763389                   |          |          |          |
| C  | 0.82011  | -4.48071 | 2.94699  | Thermal correction to Gibbs Free Energy= 0.602959         |          |          |          |
| H  | 1.19659  | -4.93897 | 2.02638  | Sum of electronic and zero-point Energies= -1726.948162   |          |          |          |
| H  | 1.6787   | -4.25223 | 3.58689  | Sum of electronic and thermal Energies= -1726.889258      |          |          |          |
| H  | 0.18764  | -5.20871 | 3.46569  | Sum of electronic and thermal Enthalpies= -1726.888108    |          |          |          |
| C  | -0.44872 | -2.5587  | 3.94475  | Sum of electronic and thermal Free Energies= -1727.048538 |          |          |          |
| H  | -0.84181 | -1.55323 | 3.77709  | SCF Done: E(RM11L)= -1727.77260169                        |          |          |          |
| H  | -1.23683 | -3.17647 | 4.38956  | <b>3'</b>                                                 |          |          |          |
| H  | 0.37305  | -2.48616 | 4.66545  | <b>Number of Negative Frequencies = 0</b>                 |          |          |          |
| C  | -1.65137 | -4.73255 | 1.41558  | B                                                         | -0.29753 | 0.01209  | 1.32093  |
| H  | -2.18576 | -4.98393 | 2.33864  | B                                                         | -1.55035 | -1.38087 | -0.72264 |
| H  | -2.37299 | -4.74762 | 0.59121  | B                                                         | -1.56175 | 1.35225  | -0.7201  |
| H  | -0.90241 | -5.50468 | 1.22316  |                                                           |          |          |          |
| C  | -2.11923 | -2.27522 | 1.58001  |                                                           |          |          |          |

|    |          |          |          |   |          |          |          |
|----|----------|----------|----------|---|----------|----------|----------|
| C  | 1.79033  | 2.68045  | -0.72271 | H | -1.53373 | 4.45486  | 1.03235  |
| H  | 0.80327  | 3.13117  | -0.77065 | H | -3.29795 | 4.43063  | 1.22963  |
| C  | 2.95187  | 3.48101  | -0.70104 | H | -2.33613 | 2.94984  | 1.51102  |
| C  | 4.22512  | 1.42535  | -0.59824 | C | -4.23828 | -2.87492 | -2.54829 |
| C  | 3.00041  | 0.71468  | -0.62227 | H | -3.95659 | -2.9486  | -3.60514 |
| C  | 2.99601  | -0.72855 | -0.56811 | H | -4.92105 | -3.70239 | -2.3212  |
| C  | 4.21508  | -1.44453 | -0.48593 | H | -4.77222 | -1.93156 | -2.40843 |
| C  | 2.926    | -3.49288 | -0.42411 | C | -2.14622 | -4.16717 | -2.04729 |
| C  | 1.77441  | -2.6848  | -0.5158  | H | -2.71034 | -5.10115 | -1.94694 |
| H  | 0.78982  | -3.14229 | -0.51885 | H | -1.82165 | -4.07289 | -3.08948 |
| N  | 1.79886  | 1.35151  | -0.68775 | H | -1.25098 | -4.23204 | -1.41923 |
| N  | 1.79083  | -1.35914 | -0.58955 | C | -4.45304 | -1.93236 | 0.21036  |
| O  | -1.24656 | 0.71576  | 2.07019  | H | -5.40779 | -2.39083 | -0.07141 |
| O  | 0.57601  | -0.66952 | 2.1844   | H | -4.46212 | -1.75616 | 1.292    |
| O  | -2.18089 | -1.76826 | -1.92305 | H | -4.3517  | -0.96154 | -0.28267 |
| O  | -2.07127 | -2.15014 | 0.33236  | C | -3.37496 | -4.16861 | 0.59873  |
| O  | -1.3358  | 2.73536  | -0.92234 | H | -3.5605  | -3.99526 | 1.66485  |
| O  | -2.94205 | 1.15015  | -0.58046 | H | -4.20892 | -4.76022 | 0.20268  |
| C  | 5.44423  | 0.66928  | -0.52876 | H | -2.45696 | -4.75536 | 0.5095   |
| C  | 5.4396   | -0.69423 | -0.47366 | C | -2.14197 | 0.61408  | 4.30917  |
| H  | 6.39211  | 1.19546  | -0.51367 | H | -1.90434 | 0.48292  | 5.37152  |
| H  | 6.38388  | -1.22389 | -0.41648 | H | -2.69237 | 1.55537  | 4.19885  |
| C  | 4.19538  | 2.85048  | -0.64318 | H | -2.80084 | -0.19878 | 3.9938   |
| C  | 4.17428  | -2.86808 | -0.41278 | C | -0.07511 | 1.93412  | 3.76961  |
| C  | 0.00699  | -0.64094 | 3.51539  | H | -0.6903  | 2.80544  | 3.52074  |
| C  | -0.87166 | 0.65817  | 3.46481  | H | 0.20506  | 2.00028  | 4.82669  |
| C  | -3.64732 | 2.3776   | -0.8562  | H | 0.83462  | 1.97948  | 3.16124  |
| C  | -2.54425 | 3.45851  | -0.58907 | C | 1.14045  | -0.61377 | 4.53603  |
| C  | -2.98993 | -2.94054 | -1.67246 | H | 0.74778  | -0.50156 | 5.55363  |
| C  | -3.25771 | -2.83277 | -0.13032 | H | 1.70171  | -1.55418 | 4.49255  |
| Ir | -0.05406 | -0.01903 | -0.6519  | H | 1.8392   | 0.20364  | 4.33912  |
| C  | -4.0952  | 2.32123  | -2.32326 | C | -0.82516 | -1.92028 | 3.67512  |
| H  | -4.69522 | 1.41731  | -2.47434 | H | -0.17181 | -2.78721 | 3.52491  |
| H  | -4.70254 | 3.18937  | -2.60342 | H | -1.27166 | -1.99717 | 4.67292  |
| H  | -3.23077 | 2.26584  | -2.99329 | H | -1.61285 | -1.96269 | 2.91743  |
| C  | -4.86604 | 2.46197  | 0.05925  | C | 2.78902  | 4.98097  | -0.74688 |
| H  | -5.37549 | 3.42682  | -0.05177 | H | 1.72975  | 5.25353  | -0.78471 |
| H  | -5.57949 | 1.67134  | -0.19972 | H | 3.22525  | 5.46263  | 0.13649  |
| H  | -4.58678 | 2.33035  | 1.10758  | H | 3.277    | 5.41381  | -1.62855 |
| C  | -2.63249 | 4.70754  | -1.4604  | C | 5.48637  | 3.62805  | -0.62424 |
| H  | -3.57554 | 5.24001  | -1.28817 | H | 6.06139  | 3.41212  | 0.2848   |
| H  | -1.8107  | 5.39026  | -1.21438 | H | 6.12032  | 3.35642  | -1.47757 |
| H  | -2.5594  | 4.46433  | -2.5237  | H | 5.3203   | 4.70542  | -0.66348 |
| C  | -2.43459 | 3.84625  | 0.89226  | C | 5.45856  | -3.65147 | -0.32216 |

|                                                          |         |          |          |   |         |          |          |
|----------------------------------------------------------|---------|----------|----------|---|---------|----------|----------|
| H                                                        | 6.10473 | -3.44573 | -1.18434 | C | 2.92578 | -2.90701 | -0.31034 |
| H                                                        | 6.02395 | -3.37461 | 0.57647  | C | 1.85943 | -3.35206 | 0.76005  |
| H                                                        | 5.28474 | -4.72772 | -0.28665 | C | 2.63079 | 1.39291  | -3.80824 |
| C                                                        | 2.75245 | -4.98984 | -0.34153 | C | 3.18764 | 2.24246  | -2.61588 |
| H                                                        | 3.24637 | -5.50131 | -1.17644 | B | 1.04723 | 0.89952  | 0.85438  |
| H                                                        | 3.1771  | -5.39328 | 0.58553  | B | 1.37341 | 0.99757  | -1.90354 |
| H                                                        | 1.69197 | -5.25938 | -0.36603 | B | 1.13355 | -1.45497 | -0.33796 |
| Thermal correction to Energy=0.904060                    |         |          |          | C | 3.47649 | 3.70468  | -2.93592 |
| Thermal correction to Enthalpy=0.905210                  |         |          |          | H | 3.84769 | 4.21412  | -2.03953 |
| Thermal correction to Gibbs Free Energy=0.720567         |         |          |          | H | 4.24316 | 3.78887  | -3.71476 |
| Sum of electronic and zero-point Energies=-2066.514712   |         |          |          | H | 2.57807 | 4.22863  | -3.27337 |
| Sum of electronic and thermal Energies=-2066.443896      |         |          |          | C | 1.74003 | 2.20449  | -4.75748 |
| Sum of electronic and thermal Enthalpies=-2066.442746    |         |          |          | H | 2.32291 | 2.90858  | -5.36141 |
| Sum of electronic and thermal Free Energies=-2066.627389 |         |          |          | H | 1.22416 | 1.51791  | -5.43728 |
| SCF Done: E(RM11L) = -2067.43065742                      |         |          |          | H | 0.9819  | 2.76531  | -4.20082 |
|                                                          |         |          |          | C | 3.68335 | 0.62285  | -4.59922 |
|                                                          |         |          |          | H | 3.20223 | 0.05754  | -5.40549 |
|                                                          |         |          |          | H | 4.41035 | 1.30715  | -5.05244 |
|                                                          |         |          |          | H | 4.21895 | -0.08636 | -3.9634  |
|                                                          |         |          |          | C | 4.39749 | 1.58956  | -1.93734 |
|                                                          |         |          |          | H | 5.29224 | 1.6423   | -2.56733 |
|                                                          |         |          |          | H | 4.60619 | 2.11297  | -0.9989  |
|                                                          |         |          |          | H | 4.18702 | 0.54283  | -1.69814 |
|                                                          |         |          |          | C | 1.90274 | 3.76661  | 1.53765  |
|                                                          |         |          |          | H | 2.23092 | 3.46415  | 0.53877  |
|                                                          |         |          |          | H | 1.01025 | 4.39131  | 1.42256  |
|                                                          |         |          |          | H | 2.68649 | 4.36953  | 2.00919  |
|                                                          |         |          |          | C | 1.03233 | 2.98001  | 3.75685  |
|                                                          |         |          |          | H | 1.83473 | 3.44311  | 4.34277  |
|                                                          |         |          |          | H | 0.23493 | 3.72101  | 3.63151  |
|                                                          |         |          |          | H | 0.62398 | 2.14031  | 4.3251   |
|                                                          |         |          |          | C | 4.08983 | 1.98152  | 2.2656   |
|                                                          |         |          |          | H | 4.3499  | 2.62816  | 3.11187  |
|                                                          |         |          |          | H | 4.79855 | 1.1461   | 2.24559  |
|                                                          |         |          |          | H | 4.21367 | 2.54999  | 1.34121  |
|                                                          |         |          |          | C | 2.57869 | 0.51874  | 3.6254   |
|                                                          |         |          |          | H | 3.30093 | -0.29587 | 3.51482  |
|                                                          |         |          |          | H | 2.81253 | 1.05142  | 4.55329  |
|                                                          |         |          |          | H | 1.57985 | 0.07989  | 3.71504  |
|                                                          |         |          |          | C | 4.35645 | -2.80683 | 0.21229  |
|                                                          |         |          |          | H | 4.71046 | -3.78027 | 0.57102  |
|                                                          |         |          |          | H | 5.02072 | -2.48133 | -0.59613 |
|                                                          |         |          |          | H | 4.4367  | -2.08094 | 1.02449  |
|                                                          |         |          |          | C | 2.89279 | -3.7507  | -1.59004 |

4c'

Number of Negative Frequencies = 0

|    |          |          |          |   |         |          |          |
|----|----------|----------|----------|---|---------|----------|----------|
| Ir | -0.11503 | 0.22534  | -0.72    | H | 4.21895 | -0.08636 | -3.9634  |
| H  | -0.30245 | -3.22654 | 0.70258  | C | 4.39749 | 1.58956  | -1.93734 |
| C  | -2.23535 | -3.45738 | 1.65248  | H | 5.29224 | 1.6423   | -2.56733 |
| C  | -3.41743 | -1.36341 | 1.92439  | H | 4.60619 | 2.11297  | -0.9989  |
| C  | -2.31737 | -0.71223 | 1.3027   | H | 4.18702 | 0.54283  | -1.69814 |
| C  | -2.30437 | 0.69779  | 1.11973  | C | 1.90274 | 3.76661  | 1.53765  |
| C  | -3.38131 | 1.49642  | 1.58088  | H | 2.23092 | 3.46415  | 0.53877  |
| C  | -2.18101 | 3.44859  | 0.81     | H | 1.01025 | 4.39131  | 1.42256  |
| C  | -1.17719 | 2.59485  | 0.36381  | H | 2.68649 | 4.36953  | 2.00919  |
| H  | -0.28803 | 2.99802  | -0.10276 | C | 1.03233 | 2.98001  | 3.75685  |
| N  | -1.22195 | -1.40565 | 0.85995  | H | 1.83473 | 3.44311  | 4.34277  |
| N  | -1.21982 | 1.24571  | 0.46325  | H | 0.23493 | 3.72101  | 3.63151  |
| O  | 2.35819  | 0.65627  | 1.22734  | H | 0.62398 | 2.14031  | 4.3251   |
| O  | 0.47114  | 1.85308  | 1.69319  | C | 4.08983 | 1.98152  | 2.2656   |
| O  | 1.774    | 0.44421  | -3.12415 | H | 4.3499  | 2.62816  | 3.11187  |
| O  | 2.08874  | 2.17869  | -1.67021 | H | 4.79855 | 1.1461   | 2.24559  |
| O  | 0.69376  | -2.57345 | 0.37383  | H | 4.21367 | 2.54999  | 1.34121  |
| O  | 2.47347  | -1.57939 | -0.66982 | C | 2.57869 | 0.51874  | 3.6254   |
| C  | -4.51385 | -0.54069 | 2.35103  | H | 3.30093 | -0.29587 | 3.51482  |
| C  | -4.49116 | 0.81546  | 2.19325  | H | 2.81253 | 1.05142  | 4.55329  |
| H  | -5.37381 | -1.00537 | 2.82126  | H | 1.57985 | 0.07989  | 3.71504  |
| H  | -5.33561 | 1.40019  | 2.54166  | C | 4.35645 | -2.80683 | 0.21229  |
| C  | -3.37984 | -2.77035 | 2.09038  | H | 4.71046 | -3.78027 | 0.57102  |
| C  | -3.3348  | 2.90284  | 1.41096  | H | 5.02072 | -2.48133 | -0.59613 |
| C  | 1.54233  | 2.54128  | 2.38848  | H | 4.4367  | -2.08094 | 1.02449  |
| C  | 2.66822  | 1.44689  | 2.41006  | C | 2.89279 | -3.7507  | -1.59004 |

|   |          |          |          |                                                          |          |          |          |
|---|----------|----------|----------|----------------------------------------------------------|----------|----------|----------|
| H | 3.52294  | -3.2703  | -2.34607 | H                                                        | -3.48687 | -4.73875 | -0.29519 |
| H | 3.27101  | -4.76448 | -1.41923 | C                                                        | -0.22645 | -4.33399 | -1.40694 |
| H | 1.87813  | -3.81729 | -1.99292 | H                                                        | 0.28921  | -3.92581 | -2.28305 |
| C | 1.48352  | -4.82922 | 0.72784  | H                                                        | 0.15676  | -3.83423 | -0.5121  |
| H | 2.35592  | -5.45636 | 0.94406  | H                                                        | 0.03678  | -5.39635 | -1.34422 |
| H | 0.72283  | -5.03312 | 1.49002  | C                                                        | -2.2772  | -4.82966 | -2.7969  |
| H | 1.07458  | -5.12089 | -0.24264 | H                                                        | -3.3649  | -4.71956 | -2.87632 |
| C | 2.22352  | -2.91601 | 2.18099  | H                                                        | -1.82102 | -4.35365 | -3.67321 |
| H | 2.46144  | -1.85098 | 2.19377  | H                                                        | -2.03567 | -5.89907 | -2.81909 |
| H | 1.36387  | -3.08302 | 2.83926  | H                                                        | -0.51361 | -1.98718 | -2.34435 |
| H | 3.0752   | -3.47995 | 2.57622  | H                                                        | -0.25417 | 0.25417  | -3.03889 |
| C | -2.0002  | 4.93294  | 0.5979   | Thermal correction to Energy=1.161165                    |          |          |          |
| H | -2.05922 | 5.48808  | 1.54207  | Thermal correction to Enthalpy=1.162315                  |          |          |          |
| H | -1.02474 | 5.14497  | 0.14803  | Thermal correction to Gibbs Free Energy=0.937800         |          |          |          |
| H | -2.76978 | 5.34494  | -0.0678  | Sum of electronic and zero-point Energies=-2549.286081   |          |          |          |
| C | -4.4867  | 3.76217  | 1.86775  | Sum of electronic and thermal Energies=-2549.196416      |          |          |          |
| H | -5.41985 | 3.47582  | 1.36481  | Sum of electronic and thermal Enthalpies=-2549.195266    |          |          |          |
| H | -4.66276 | 3.65998  | 2.94679  | Sum of electronic and thermal Free Energies=-2549.419781 |          |          |          |
| H | -4.31751 | 4.82097  | 1.66298  | SCF Done: E(RM11L) = -2550.42842331                      |          |          |          |
| C | -4.54057 | -3.48622 | 2.73536  | <b>TS<sub>sc</sub>'</b>                                  |          |          |          |
| H | -4.66349 | -3.17621 | 3.78128  | <b>Number of Negative Frequencies =1</b>                 |          |          |          |
| H | -5.48106 | -3.25745 | 2.21991  | B                                                        | 1.21395  | -0.28844 | 1.52724  |
| H | -4.41551 | -4.57011 | 2.72393  | B                                                        | 2.2663   | 0.10293  | -1.12144 |
| C | -2.06967 | -4.95009 | 1.80812  | B                                                        | 0.49456  | -1.97223 | -0.22222 |
| H | -2.17329 | -5.26171 | 2.85456  | C                                                        | -2.40489 | -0.68024 | 1.16754  |
| H | -2.81606 | -5.50546 | 1.22648  | H                                                        | -2.05339 | -1.67298 | 0.92046  |
| H | -1.08027 | -5.26773 | 1.46494  | C                                                        | -3.5996  | -0.49531 | 1.89213  |
| C | -1.20142 | -2.72779 | 1.04586  | C                                                        | -4.02446 | 0.80901  | 2.15211  |
| C | -1.66275 | 1.84096  | -2.77662 | C                                                        | -3.181   | 1.8826   | 1.73986  |
| C | -2.91689 | 2.2017   | -2.27222 | C                                                        | -1.97198 | 1.57703  | 1.0685   |
| C | -3.72269 | 1.23811  | -1.65509 | C                                                        | -1.02374 | 2.61673  | 0.76223  |
| C | -3.28246 | -0.07909 | -1.54233 | C                                                        | -1.32851 | 3.9685   | 1.05171  |
| C | -2.02234 | -0.44981 | -2.04271 | C                                                        | -0.35287 | 4.96875  | 0.76853  |
| C | -1.2169  | 0.52463  | -2.65823 | C                                                        | 0.88111  | 4.55739  | 0.26283  |
| H | -1.02807 | 2.58579  | -3.24951 | C                                                        | 1.09145  | 3.18383  | 0.02506  |
| H | -3.26216 | 3.22891  | -2.3533  | H                                                        | 2.04153  | 2.82445  | -0.35503 |
| H | -4.69125 | 1.51883  | -1.24992 | C                                                        | 2.71115  | -0.49488 | 3.27636  |
| H | -3.8994  | -0.83316 | -1.06416 | C                                                        | 1.24899  | -0.72067 | 3.8011   |
| C | -1.52882 | -1.83986 | -1.95556 | C                                                        | 4.28694  | -0.62661 | -1.95396 |
| N | -2.24511 | -2.7901  | -1.49293 | C                                                        | 4.33412  | 0.93081  | -1.78869 |
| C | -1.75558 | -4.1844  | -1.49745 | C                                                        | -0.3054  | -4.11694 | 0.12692  |
| C | -2.39961 | -4.87521 | -0.28301 | C                                                        | 1.25044  | -4.14769 | -0.05642 |
| H | -2.18194 | -5.94998 | -0.28445 | Ir                                                       | 0.36597  | 0.09104  | -0.37861 |
| H | -2.01467 | -4.4495  | 0.64874  | N                                                        | -1.62944 | 0.306    | 0.74339  |

|   |          |          |          |   |          |          |          |
|---|----------|----------|----------|---|----------|----------|----------|
| N | 0.17801  | 2.24395  | 0.24189  | H | 2.91473  | -2.47444 | 2.40157  |
| O | 2.47795  | 0.08613  | 1.96621  | C | 1.0542   | -1.96048 | 4.66733  |
| O | 0.50564  | -0.89372 | 2.56872  | H | 1.64625  | -1.89378 | 5.58777  |
| O | 2.86485  | -0.8855  | -1.90759 | H | -0.00066 | -2.05176 | 4.95006  |
| O | 3.16255  | 1.17077  | -0.96838 | H | 1.33882  | -2.87167 | 4.13555  |
| O | -0.63291 | -2.79215 | -0.37516 | C | 0.65972  | 0.51371  | 4.49685  |
| O | 1.59947  | -2.75126 | 0.09664  | H | -0.41385 | 0.35817  | 4.65     |
| H | 0.0838   | -0.63112 | -1.81661 | H | 1.12446  | 0.69724  | 5.4717   |
| C | -0.55766 | 0.82314  | -2.30763 | H | 0.78378  | 1.40678  | 3.87502  |
| C | 0.18143  | 1.82977  | -2.96228 | C | 2.00847  | -4.96013 | 0.98867  |
| C | -0.38283 | 2.64208  | -3.94534 | H | 3.0854   | -4.89346 | 0.79832  |
| H | 0.2165   | 3.42011  | -4.41388 | H | 1.82179  | -4.59106 | 2.00011  |
| C | -1.71671 | 2.45204  | -4.32601 | H | 1.72011  | -6.0168  | 0.94369  |
| H | -2.16825 | 3.0796   | -5.09052 | C | 1.6816   | -4.5661  | -1.46731 |
| C | -2.44996 | 1.43067  | -3.73597 | H | 2.75011  | -4.36036 | -1.58683 |
| H | -3.47485 | 1.23909  | -4.0405  | H | 1.51029  | -5.63332 | -1.64507 |
| C | -1.88558 | 0.59905  | -2.74602 | H | 1.14351  | -3.99138 | -2.22786 |
| C | -3.47626 | 3.2651   | 1.99232  | C | -0.73543 | -4.15417 | 1.59814  |
| C | -2.60171 | 4.25718  | 1.65242  | H | -1.81176 | -3.95833 | 1.66104  |
| H | -2.86177 | 5.2876   | 1.8685   | H | -0.54496 | -5.13204 | 2.05335  |
| H | -4.4116  | 3.52648  | 2.47446  | H | -0.21755 | -3.38076 | 2.1735   |
| C | -4.36019 | -1.72131 | 2.3388   | C | -1.07114 | -5.16047 | -0.67901 |
| H | -3.82676 | -2.63204 | 2.04947  | H | -0.76247 | -6.1717  | -0.3887  |
| H | -4.48579 | -1.74064 | 3.4279   | H | -2.14538 | -5.068   | -0.488   |
| H | -5.36026 | -1.76794 | 1.89316  | H | -0.90629 | -5.04261 | -1.75321 |
| C | -5.32014 | 1.09771  | 2.86595  | C | 4.12811  | 1.68042  | -3.11009 |
| H | -5.14297 | 1.63479  | 3.80603  | H | 3.95427  | 2.74121  | -2.89727 |
| H | -5.97222 | 1.72975  | 2.25103  | H | 5.00464  | 1.60023  | -3.7622  |
| H | -5.87038 | 0.18575  | 3.10248  | H | 3.25711  | 1.29306  | -3.64771 |
| C | 2.00825  | 5.51469  | -0.04426 | C | 5.56083  | 1.47165  | -1.06061 |
| H | 2.30059  | 6.09114  | 0.84127  | H | 6.47892  | 1.22602  | -1.60734 |
| H | 2.89136  | 4.97247  | -0.39647 | H | 5.49646  | 2.56338  | -0.98189 |
| H | 1.72594  | 6.23295  | -0.82361 | H | 5.63682  | 1.06665  | -0.04863 |
| C | -0.66703 | 6.4188   | 1.03135  | C | 4.84824  | -1.15967 | -3.26724 |
| H | -1.57437 | 6.72398  | 0.49648  | H | 5.91349  | -0.91896 | -3.3639  |
| H | -0.84852 | 6.59497  | 2.0992   | H | 4.74416  | -2.25026 | -3.29627 |
| H | 0.14116  | 7.08079  | 0.7175   | H | 4.31795  | -0.74883 | -4.13031 |
| C | 3.54942  | 0.47729  | 4.10023  | C | 4.91398  | -1.36848 | -0.7652  |
| H | 3.6735   | 0.11256  | 5.12662  | H | 4.66351  | -2.43116 | -0.84081 |
| H | 4.54515  | 0.57724  | 3.65415  | H | 6.00508  | -1.26715 | -0.74998 |
| H | 3.09669  | 1.47159  | 4.1344   | H | 4.50473  | -0.99689 | 0.17882  |
| C | 3.48257  | -1.80007 | 3.04794  | H | 1.21278  | 2.00548  | -2.67323 |
| H | 4.42646  | -1.57079 | 2.54209  | C | -2.68742 | -0.53986 | -2.23545 |
| H | 3.71465  | -2.30712 | 3.99096  | N | -3.93062 | -0.64887 | -2.51218 |

|                                                          |          |          |          |    |          |          |          |
|----------------------------------------------------------|----------|----------|----------|----|----------|----------|----------|
| C                                                        | -4.73379 | -1.80926 | -2.10426 | C  | -1.67055 | -2.44282 | 2.90777  |
| C                                                        | -5.35514 | -2.36458 | -3.40179 | C  | -0.71363 | -3.53899 | 2.32123  |
| H                                                        | -6.05779 | -3.17599 | -3.17736 | Ir | 0.08518  | -0.21899 | -0.35576 |
| H                                                        | -5.89308 | -1.57642 | -3.94053 | N  | -1.29571 | 1.44329  | 0.45903  |
| H                                                        | -4.57506 | -2.7579  | -4.0648  | N  | 1.21551  | 1.64189  | -0.53    |
| C                                                        | -5.85038 | -1.25715 | -1.19637 | O  | 2.6177   | -0.57528 | 1.42149  |
| H                                                        | -6.54332 | -2.05447 | -0.90139 | O  | 0.98499  | 0.51605  | 2.58762  |
| H                                                        | -5.42144 | -0.81327 | -0.29179 | O  | 1.09813  | -2.85764 | -1.55786 |
| H                                                        | -6.4199  | -0.47844 | -1.71643 | O  | 2.65094  | -1.19247 | -1.71278 |
| C                                                        | -3.97427 | -2.93761 | -1.38805 | O  | -1.61343 | -1.42206 | 1.87871  |
| H                                                        | -4.66042 | -3.76677 | -1.17896 | O  | 0.23025  | -2.73959 | 1.56274  |
| H                                                        | -3.15887 | -3.32421 | -2.00752 | H  | -0.84826 | -1.52601 | -0.46754 |
| H                                                        | -3.54883 | -2.60947 | -0.43754 | C  | -0.64217 | 0.24802  | -2.34991 |
| H                                                        | -2.13106 | -1.28028 | -1.65246 | C  | 0.26522  | 0.73658  | -3.31754 |
| Thermal correction to Energy=1.156265                    |          |          |          | C  | -0.12346 | 1.15411  | -4.59125 |
| Thermal correction to Enthalpy=1.157415                  |          |          |          | H  | 0.62428  | 1.51837  | -5.29399 |
| Thermal correction to Gibbs Free Energy=0.935589         |          |          |          | C  | -1.4709  | 1.09263  | -4.96483 |
| Sum of electronic and zero-point Energies=-2549.240898   |          |          |          | H  | -1.79    | 1.41685  | -5.95271 |
| Sum of electronic and thermal Energies=-2549.151933      |          |          |          | C  | -2.39257 | 0.58854  | -4.05693 |
| Sum of electronic and thermal Enthalpies=-2549.150783    |          |          |          | H  | -3.44184 | 0.50282  | -4.327   |
| Sum of electronic and thermal Free Energies=-2549.372609 |          |          |          | C  | -1.99953 | 0.15951  | -2.77042 |
| SCF Done: E(RM11L) = -2550.37314743                      |          |          |          | C  | -0.84148 | 5.12474  | 0.52481  |
|                                                          |          |          |          | C  | 0.43208  | 5.22161  | 0.04581  |
|                                                          |          |          |          | H  | 0.88684  | 6.2005   | -0.05437 |
|                                                          |          |          |          | H  | -1.37505 | 6.02898  | 0.7953   |
|                                                          |          |          |          | C  | -4.64139 | 2.13708  | 2.03239  |
|                                                          |          |          |          | H  | -4.81596 | 1.05949  | 2.1038   |
|                                                          |          |          |          | H  | -4.71206 | 2.55394  | 3.04428  |
|                                                          |          |          |          | H  | -5.45887 | 2.56984  | 1.44374  |
|                                                          |          |          |          | C  | -3.58176 | 4.93326  | 1.63814  |
|                                                          |          |          |          | H  | -3.08726 | 5.47347  | 2.45542  |
|                                                          |          |          |          | H  | -3.66774 | 5.63047  | 0.79633  |
|                                                          |          |          |          | H  | -4.59144 | 4.68298  | 1.96686  |
|                                                          |          |          |          | C  | 4.61993  | 2.86413  | -1.55426 |
|                                                          |          |          |          | H  | 5.30493  | 3.30234  | -0.8186  |
|                                                          |          |          |          | H  | 4.92599  | 1.8263   | -1.71784 |
|                                                          |          |          |          | H  | 4.76099  | 3.40662  | -2.4967  |
|                                                          |          |          |          | C  | 3.21842  | 5.46362  | -0.91244 |
|                                                          |          |          |          | H  | 2.65623  | 6.1261   | -1.58159 |
|                                                          |          |          |          | H  | 3.28018  | 5.96686  | 0.06058  |
|                                                          |          |          |          | H  | 4.23156  | 5.37468  | -1.30639 |
|                                                          |          |          |          | C  | 4.64152  | 0.1746   | 2.5089   |
|                                                          |          |          |          | H  | 5.0937   | 0.48937  | 3.45643  |
|                                                          |          |          |          | H  | 5.23236  | -0.6576  | 2.11041  |

6c'

Number of Negative Frequencies = 0

|   |          |          |          |   |          |         |          |
|---|----------|----------|----------|---|----------|---------|----------|
| B | 1.28657  | -0.19793 | 1.43493  | C | -4.64139 | 2.13708 | 2.03239  |
| B | 1.37829  | -1.52873 | -1.24178 | H | -4.81596 | 1.05949 | 2.1038   |
| B | -0.41107 | -1.56606 | 1.17926  | H | -4.71206 | 2.55394 | 3.04428  |
| C | -2.50271 | 1.32991  | 0.99621  | H | -5.45887 | 2.56984 | 1.44374  |
| H | -2.85879 | 0.3172   | 1.12982  | C | -3.58176 | 4.93326 | 1.63814  |
| C | -3.29478 | 2.42066  | 1.41291  | H | -3.08726 | 5.47347 | 2.45542  |
| C | -2.79329 | 3.71098  | 1.24371  | H | -3.66774 | 5.63047 | 0.79633  |
| C | -1.48583 | 3.85353  | 0.69548  | H | -4.59144 | 4.68298 | 1.96686  |
| C | -0.77229 | 2.68877  | 0.32088  | C | 4.61993  | 2.86413 | -1.55426 |
| C | 0.56686  | 2.79334  | -0.19626 | H | 5.30493  | 3.30234 | -0.8186  |
| C | 1.19035  | 4.05869  | -0.32038 | H | 4.92599  | 1.8263  | -1.71784 |
| C | 2.53632  | 4.12689  | -0.78191 | H | 4.76099  | 3.40662 | -2.4967  |
| C | 3.18686  | 2.93017  | -1.08408 | C | 3.21842  | 5.46362 | -0.91244 |
| C | 2.47866  | 1.7218   | -0.94411 | H | 2.65623  | 6.1261  | -1.58159 |
| H | 2.94673  | 0.77559  | -1.1843  | H | 3.28018  | 5.96686 | 0.06058  |
| C | 3.1992   | -0.27511 | 2.71796  | H | 4.23156  | 5.37468 | -1.30639 |
| C | 2.23124  | 0.83282  | 3.26951  | C | 4.64152  | 0.1746  | 2.5089   |
| C | 2.3208   | -3.49303 | -2.00251 | H | 5.0937   | 0.48937 | 3.45643  |
| C | 3.14638  | -2.27318 | -2.5427  | H | 5.23236  | -0.6576 | 2.11041  |



|   |          |          |          |
|---|----------|----------|----------|
| H | 4.70619  | 1.0028   | 1.79832  |
| C | 3.15751  | -1.57405 | 3.52847  |
| H | 3.71094  | -2.34835 | 2.98677  |
| H | 3.61103  | -1.4529  | 4.51812  |
| H | 2.1284   | -1.92348 | 3.64577  |
| C | 1.99242  | 0.7915   | 4.77517  |
| H | 2.92895  | 0.95721  | 5.31997  |
| H | 1.28937  | 1.58205  | 5.06039  |
| H | 1.57063  | -0.16463 | 5.09312  |
| C | 2.62246  | 2.25125  | 2.83831  |
| H | 1.80499  | 2.93677  | 3.08478  |
| H | 3.52581  | 2.59347  | 3.35458  |
| H | 2.7958   | 2.30391  | 1.7603   |
| C | 0.05109  | -4.35223 | 3.35905  |
| H | 0.71203  | -5.06639 | 2.85566  |
| H | 0.66735  | -3.71487 | 3.99705  |
| H | -0.6407  | -4.91827 | 3.9935   |
| C | -1.41134 | -4.47161 | 1.32342  |
| H | -0.65308 | -5.06297 | 0.80006  |
| H | -2.10102 | -5.15822 | 1.82607  |
| H | -1.96884 | -3.90063 | 0.57365  |
| C | -1.14582 | -1.81076 | 4.20117  |
| H | -1.75898 | -0.9359  | 4.44316  |
| H | -1.19494 | -2.51029 | 5.04251  |
| H | -0.11614 | -1.46792 | 4.07615  |
| C | -3.12028 | -2.88202 | 3.08549  |
| H | -3.18633 | -3.70973 | 3.80105  |
| H | -3.71527 | -2.04893 | 3.47639  |
| H | -3.56616 | -3.20108 | 2.14122  |
| C | 2.81424  | -1.91503 | -3.99587 |
| H | 3.27226  | -0.95032 | -4.23961 |
| H | 3.20003  | -2.66357 | -4.69637 |
| H | 1.73385  | -1.81958 | -4.13933 |
| C | 4.65681  | -2.37805 | -2.35625 |
| H | 5.05826  | -3.2385  | -2.90416 |
| H | 5.14189  | -1.47453 | -2.74379 |
| H | 4.9261   | -2.47789 | -1.30165 |
| C | 1.97504  | -4.5503  | -3.04609 |
| H | 2.88375  | -4.99645 | -3.46709 |
| H | 1.38923  | -5.35127 | -2.58115 |
| H | 1.38149  | -4.13009 | -3.86216 |
| C | 2.95955  | -4.1468  | -0.77064 |
| H | 2.24185  | -4.84446 | -0.32719 |
| H | 3.86763  | -4.70285 | -1.02904 |

|   |          |          |          |
|---|----------|----------|----------|
| H | 3.20621  | -3.39386 | -0.016   |
| H | 1.3226   | 0.77662  | -3.07347 |
| C | -3.03812 | -0.43085 | -1.89389 |
| N | -4.27641 | -0.45497 | -2.21048 |
| C | -5.279   | -1.11028 | -1.35527 |
| C | -6.05865 | -2.06529 | -2.28057 |
| H | -6.89028 | -2.5378  | -1.74378 |
| H | -6.46379 | -1.52112 | -3.14117 |
| H | -5.40077 | -2.85662 | -2.65998 |
| C | -6.21905 | 0.0037   | -0.85548 |
| H | -7.04863 | -0.41753 | -0.27461 |
| H | -5.6737  | 0.70787  | -0.21794 |
| H | -6.63654 | 0.56426  | -1.69954 |
| C | -4.72884 | -1.90345 | -0.15619 |
| H | -5.55582 | -2.38576 | 0.37744  |
| H | -4.03469 | -2.68856 | -0.47935 |
| H | -4.20162 | -1.26639 | 0.55985  |
| H | -2.65902 | -0.87197 | -0.96988 |

Thermal correction to Energy=1.158943

Thermal correction to Enthalpy=1.160093

Thermal correction to Gibbs Free Energy=0.941530

Sum of electronic and zero-point Energies=-2549.260412

Sum of electronic and thermal Energies=-2549.171524

Sum of electronic and thermal Enthalpies=-2549.170374

Sum of electronic and thermal Free Energies=-2549.388937

SCF Done: E(RM11L) = -2550.39841894

**7c'**

**Number of Negative Frequencies =0**

|    |          |          |          |
|----|----------|----------|----------|
| Ir | -0.08865 | -0.36403 | -0.77302 |
| B  | 1.94052  | -0.75468 | -1.12044 |
| B  | 0.5292   | -2.04442 | 0.3354   |
| O  | 2.41777  | -1.22287 | -2.33626 |
| O  | 2.99839  | -0.48201 | -0.25474 |
| C  | -1.87137 | 2.43153  | 2.19007  |
| C  | -0.01091 | 1.47312  | 3.39537  |
| C  | 0.3081   | 0.77673  | 2.21321  |
| H  | 1.16321  | 0.11661  | 2.18871  |
| C  | -3.4474  | 2.47659  | -0.20903 |
| N  | -1.93478 | 0.82341  | -1.12501 |
| N  | -0.3865  | 0.85489  | 1.08505  |
| O  | 0.4594   | -2.08127 | 1.73231  |
| O  | 1.1498   | -3.20533 | -0.13132 |
| C  | -2.29699 | 1.65801  | -0.11806 |

|   |          |          |          |   |          |          |          |
|---|----------|----------|----------|---|----------|----------|----------|
| C | -1.48948 | 1.65274  | 1.07188  | H | -0.39645 | -4.03473 | 3.30141  |
| O | -2.55332 | -1.28653 | 0.81157  | C | 2.65663  | -2.57174 | 2.54522  |
| O | -2.04783 | -2.90195 | -0.71754 | H | 3.34352  | -3.32223 | 2.9512   |
| C | -3.78119 | 3.29223  | 0.92469  | H | 3.10145  | -2.11483 | 1.65765  |
| C | -3.03542 | 3.2642   | 2.06694  | H | 2.52957  | -1.78642 | 3.29934  |
| H | -4.65439 | 3.93305  | 0.87619  | C | -4.27135 | -2.57517 | -1.54635 |
| H | -3.33223 | 3.88198  | 2.90706  | H | -3.97095 | -3.09361 | -2.46305 |
| C | -4.23086 | 2.43271  | -1.39835 | H | -5.34397 | -2.73609 | -1.39484 |
| C | -1.10259 | 2.34167  | 3.38509  | H | -4.09509 | -1.50512 | -1.69184 |
| C | 1.30496  | -4.13179 | 0.97728  | C | -3.69023 | -4.61489 | -0.21521 |
| C | 1.28341  | -3.16936 | 2.21585  | H | -3.52544 | -5.11987 | -1.1734  |
| C | -3.44584 | -3.11757 | -0.37371 | H | -3.01906 | -5.0629  | 0.52063  |
| C | -3.60805 | -2.27181 | 0.94439  | H | -4.72428 | -4.80519 | 0.09448  |
| C | 3.84809  | -1.42502 | -2.24931 | C | -3.32026 | -3.06437 | 2.22304  |
| C | 4.24278  | -0.53896 | -1.00778 | H | -3.27422 | -2.36966 | 3.06831  |
| H | -0.12128 | -1.21044 | -2.1097  | H | -4.10041 | -3.80575 | 2.42604  |
| C | -3.8314  | 1.56907  | -2.42101 | H | -2.35648 | -3.57501 | 2.15932  |
| C | 4.07257  | -2.92267 | -2.02676 | C | -4.9392  | -1.53567 | 1.07599  |
| H | 3.56488  | -3.24866 | -1.11891 | H | -5.77577 | -2.24332 | 1.10084  |
| H | 3.63716  | -3.47561 | -2.86622 | H | -4.95178 | -0.96313 | 2.01011  |
| H | 5.13717  | -3.17359 | -1.96335 | H | -5.09682 | -0.83505 | 0.25207  |
| C | 4.47679  | -0.99159 | -3.57194 | C | -4.58896 | 1.41924  | -3.71782 |
| H | 5.57004  | -1.05989 | -3.52757 | H | -4.62673 | 2.36386  | -4.27302 |
| H | 4.12929  | -1.65129 | -4.37475 | H | -4.11227 | 0.67346  | -4.36138 |
| H | 4.19938  | 0.03203  | -3.83522 | H | -5.62335 | 1.09949  | -3.54495 |
| C | 4.61242  | 0.89843  | -1.39052 | C | -5.45689 | 3.29978  | -1.51872 |
| H | 4.71816  | 1.49946  | -0.48258 | H | -6.19048 | 3.04853  | -0.74256 |
| H | 5.56133  | 0.93403  | -1.93606 | H | -5.20023 | 4.358    | -1.38787 |
| H | 3.83559  | 1.35841  | -2.00647 | H | -5.94625 | 3.19217  | -2.48748 |
| C | 5.32272  | -1.1294  | -0.10575 | C | -1.47444 | 3.17113  | 4.58674  |
| H | 6.27303  | -1.21837 | -0.64464 | H | -1.4924  | 4.23777  | 4.33284  |
| H | 5.48208  | -0.47057 | 0.75527  | H | -2.4751  | 2.90946  | 4.95263  |
| H | 5.04393  | -2.11604 | 0.2716   | H | -0.77278 | 3.03825  | 5.41135  |
| C | 2.59836  | -4.92269 | 0.8109   | C | 0.86405  | 1.2664   | 4.6073   |
| H | 2.73132  | -5.61218 | 1.65291  | H | 1.38482  | 2.18882  | 4.89114  |
| H | 2.55649  | -5.51595 | -0.10875 | H | 0.2786   | 0.93846  | 5.47406  |
| H | 3.47614  | -4.27595 | 0.75777  | H | 1.62369  | 0.50347  | 4.4113   |
| C | 0.10623  | -5.08523 | 0.92688  | C | -2.67662 | 0.78692  | -2.22507 |
| H | -0.82897 | -4.5301  | 1.0109   | H | -2.34733 | 0.09708  | -2.99338 |
| H | 0.09997  | -5.59611 | -0.04156 | B | -1.6216  | -1.72882 | -0.11569 |
| H | 0.15226  | -5.84119 | 1.71816  | C | 1.38298  | 2.48922  | -1.44204 |
| C | 0.64277  | -3.74633 | 3.47382  | C | 0.75576  | 1.30658  | -1.91649 |
| H | 1.19793  | -4.62418 | 3.82364  | C | 0.42998  | 1.29524  | -3.29349 |
| H | 0.65545  | -2.99578 | 4.27214  | C | 0.64767  | 2.37961  | -4.14237 |

|                                                          |          |         |          |   |          |          |          |
|----------------------------------------------------------|----------|---------|----------|---|----------|----------|----------|
| C                                                        | 1.2288   | 3.54954 | -3.64006 | N | 0.77611  | -0.71981 | 1.14606  |
| C                                                        | 1.60051  | 3.588   | -2.30355 | O | -1.15706 | 1.83062  | 1.6834   |
| H                                                        | -0.01567 | 0.39984 | -3.71755 | O | -1.87217 | 2.80146  | -0.25311 |
| H                                                        | 0.3727   | 2.30983 | -5.19332 | C | 2.64123  | -1.30845 | -0.24103 |
| H                                                        | 2.09031  | 4.46647 | -1.89319 | C | 1.91083  | -1.45564 | 0.98974  |
| H                                                        | 1.4111   | 4.40392 | -4.28782 | O | 2.3161   | 1.82592  | 0.96995  |
| C                                                        | 1.942    | 2.59657 | -0.07067 | O | 1.42856  | 3.35141  | -0.47817 |
| N                                                        | 2.23325  | 3.73316 | 0.43881  | C | 4.27519  | -2.93616 | 0.56029  |
| C                                                        | 2.93616  | 3.87118 | 1.72374  | C | 3.59406  | -3.06418 | 1.7359   |
| C                                                        | 4.11758  | 4.82175 | 1.44321  | H | 5.17482  | -3.52009 | 0.40255  |
| H                                                        | 4.81927  | 4.36662 | 0.73363  | H | 3.96904  | -3.74412 | 2.49279  |
| H                                                        | 3.75988  | 5.76187 | 1.00861  | C | 4.56031  | -1.80518 | -1.67198 |
| H                                                        | 4.66319  | 5.04991 | 2.36698  | C | 1.7342   | -2.3351  | 3.26536  |
| C                                                        | 1.95553  | 4.55324 | 2.69735  | C | -2.36481 | 3.64194  | 0.82156  |
| H                                                        | 1.10025  | 3.90184 | 2.90277  | C | -2.26005 | 2.68904  | 2.06269  |
| H                                                        | 2.45092  | 4.78888 | 3.64702  | C | 2.69149  | 3.91672  | -0.0318  |
| H                                                        | 1.57401  | 5.48604 | 2.26652  | C | 2.99728  | 3.07399  | 1.2568   |
| C                                                        | 3.47798  | 2.57045 | 2.34097  | C | -3.668   | 0.53601  | -2.78291 |
| H                                                        | 4.00307  | 2.79181 | 3.27729  | C | -4.07773 | -0.35339 | -1.54845 |
| H                                                        | 2.68124  | 1.85979 | 2.56858  | H | 0.04923  | 1.29386  | -2.02698 |
| H                                                        | 4.18756  | 2.07658 | 1.66766  | C | 4.05551  | -0.87102 | -2.57945 |
| H                                                        | 2.14599  | 1.64447 | 0.42023  | C | -4.14383 | 1.98788  | -2.67558 |
| Thermal correction to Energy=1.159007                    |          |         |          | H | -3.80501 | 2.42769  | -1.73701 |
| Thermal correction to Enthalpy=1.160157                  |          |         |          | H | -3.69891 | 2.56551  | -3.49358 |
| Thermal correction to Gibbs Free Energy=0.941512         |          |         |          | H | -5.23384 | 2.07021  | -2.75127 |
| Sum of electronic and zero-point Energies=-2549.254152   |          |         |          | C | -4.0593  | -0.0438  | -4.14131 |
| Sum of electronic and thermal Energies=-2549.165256      |          |         |          | H | -5.14771 | -0.14767 | -4.22303 |
| Sum of electronic and thermal Enthalpies=-2549.164106    |          |         |          | H | -3.72332 | 0.62841  | -4.93882 |
| Sum of electronic and thermal Free Energies=-2549.382752 |          |         |          | H | -3.6011  | -1.02127 | -4.31174 |
| SCF Done: E(RM11L) = -2550.38817209                      |          |         |          | C | -4.17295 | -1.84821 | -1.8819  |
|                                                          |          |         |          | H | -4.27554 | -2.41683 | -0.95188 |
|                                                          |          |         |          | H | -5.04054 | -2.06244 | -2.51509 |
|                                                          |          |         |          | H | -3.27269 | -2.20322 | -2.3891  |
|                                                          |          |         |          | C | -5.34734 | 0.09088  | -0.82673 |
|                                                          |          |         |          | H | -6.21683 | 0.01285  | -1.48963 |
|                                                          |          |         |          | H | -5.52422 | -0.55633 | 0.03969  |
|                                                          |          |         |          | H | -5.27437 | 1.12066  | -0.46978 |
|                                                          |          |         |          | C | -3.78096 | 4.10669  | 0.49697  |
|                                                          |          |         |          | H | -4.18883 | 4.69639  | 1.3264   |
|                                                          |          |         |          | H | -3.77105 | 4.74062  | -0.39627 |
|                                                          |          |         |          | H | -4.4524  | 3.26648  | 0.30774  |
|                                                          |          |         |          | C | -1.42293 | 4.8485   | 0.90545  |
|                                                          |          |         |          | H | -0.39856 | 4.52256  | 1.09616  |
|                                                          |          |         |          | H | -1.42741 | 5.37002  | -0.05745 |

### TS8c'

#### Number of Negative Frequencies =1

|    |          |          |          |   |          |          |          |
|----|----------|----------|----------|---|----------|----------|----------|
| Ir | 0.15681  | 0.44253  | -0.69875 | C | -5.34734 | 0.09088  | -0.82673 |
| B  | -1.82932 | 0.18699  | -1.4045  | H | -6.21683 | 0.01285  | -1.48963 |
| B  | -1.06443 | 1.80141  | 0.28538  | H | -5.52422 | -0.55633 | 0.03969  |
| O  | -2.22556 | 0.55795  | -2.69183 | H | -5.27437 | 1.12066  | -0.46978 |
| O  | -2.95228 | -0.18031 | -0.65153 | C | -3.78096 | 4.10669  | 0.49697  |
| C  | 2.4065   | -2.30335 | 2.00927  | H | -4.18883 | 4.69639  | 1.3264   |
| C  | 0.648    | -1.479   | 3.44274  | H | -3.77105 | 4.74062  | -0.39627 |
| C  | 0.20161  | -0.71899 | 2.34239  | H | -4.4524  | 3.26648  | 0.30774  |
| H  | -0.65525 | -0.06581 | 2.4395   | C | -1.42293 | 4.8485   | 0.90545  |
| C  | 3.83871  | -2.02934 | -0.46391 | H | -0.39856 | 4.52256  | 1.09616  |
| N  | 2.16039  | -0.4241  | -1.1501  | H | -1.42741 | 5.37002  | -0.05745 |

|   |          |          |          |                                                          |          |          |          |
|---|----------|----------|----------|----------------------------------------------------------|----------|----------|----------|
| H | -1.73156 | 5.55513  | 1.68345  | C                                                        | -0.87708 | -2.66682 | -1.05458 |
| C | -1.91435 | 3.37571  | 3.3798   | C                                                        | -0.5041  | -1.45862 | -1.69758 |
| H | -2.68866 | 4.10148  | 3.65407  | C                                                        | -0.07242 | -1.56482 | -3.0385  |
| H | -1.84997 | 2.63036  | 4.18074  | C                                                        | 0.06524  | -2.78586 | -3.69329 |
| H | -0.95349 | 3.89304  | 3.32469  | C                                                        | -0.25526 | -3.97256 | -3.02015 |
| C | -3.48194 | 1.77897  | 2.23932  | C                                                        | -0.73673 | -3.9031  | -1.71989 |
| H | -4.36954 | 2.33835  | 2.55418  | H                                                        | 0.16463  | -0.65345 | -3.5796  |
| H | -3.6978  | 1.24444  | 1.31105  | H                                                        | 0.41407  | -2.81539 | -4.72361 |
| H | -3.25859 | 1.03297  | 3.01069  | H                                                        | -1.03776 | -4.80417 | -1.19361 |
| C | 3.70301  | 3.6761   | -1.16004 | H                                                        | -0.15376 | -4.93459 | -3.51699 |
| H | 3.32566  | 4.13472  | -2.0801  | C                                                        | -1.52354 | -2.65965 | 0.27929  |
| H | 4.67959  | 4.11617  | -0.93117 | N                                                        | -1.87388 | -3.74386 | 0.85841  |
| H | 3.83651  | 2.60512  | -1.34752 | C                                                        | -2.62259 | -3.74161 | 2.12427  |
| C | 2.50979  | 5.41322  | 0.19864  | C                                                        | -3.88192 | -4.59217 | 1.86491  |
| H | 2.26741  | 5.90633  | -0.74923 | H                                                        | -4.5306  | -4.10422 | 1.12694  |
| H | 1.69922  | 5.6214   | 0.90073  | H                                                        | -3.608   | -5.57915 | 1.47571  |
| H | 3.43233  | 5.85975  | 0.58736  | H                                                        | -4.45628 | -4.72863 | 2.78928  |
| C | 2.36184  | 3.65048  | 2.52651  | C                                                        | -1.72678 | -4.45169 | 3.15827  |
| H | 2.45513  | 2.91688  | 3.33455  | H                                                        | -0.8003  | -3.88864 | 3.31363  |
| H | 2.85295  | 4.5772   | 2.84212  | H                                                        | -2.24358 | -4.54948 | 4.12056  |
| H | 1.29669  | 3.84795  | 2.37658  | H                                                        | -1.45581 | -5.45417 | 2.80756  |
| C | 4.47416  | 2.77592  | 1.49947  | C                                                        | -3.05162 | -2.36118 | 2.65295  |
| H | 5.04402  | 3.70271  | 1.63307  | H                                                        | -3.63894 | -2.4833  | 3.57007  |
| H | 4.58393  | 2.17595  | 2.40991  | H                                                        | -2.19286 | -1.72977 | 2.89152  |
| H | 4.9119   | 2.21212  | 0.67178  | H                                                        | -3.66997 | -1.82688 | 1.92307  |
| C | 4.73965  | -0.53188 | -3.88093 | H                                                        | -1.73209 | -1.67168 | 0.68411  |
| H | 4.83011  | -1.41152 | -4.52926 | Thermal correction to Energy=1.157752                    |          |          |          |
| H | 4.17526  | 0.22898  | -4.42876 | Thermal correction to Enthalpy=1.158902                  |          |          |          |
| H | 5.751    | -0.14227 | -3.71494 | Thermal correction to Gibbs Free Energy=0.944162         |          |          |          |
| C | 5.83902  | -2.55925 | -1.93174 | Sum of electronic and zero-point Energies=-2549.253056   |          |          |          |
| H | 6.58399  | -2.34306 | -1.15595 | Sum of electronic and thermal Energies=-2549.165347      |          |          |          |
| H | 5.66346  | -3.64166 | -1.91648 | Sum of electronic and thermal Enthalpies=-2549.164197    |          |          |          |
| H | 6.27956  | -2.30675 | -2.89704 | Sum of electronic and thermal Free Energies=-2549.378937 |          |          |          |
| C | 2.21575  | -3.25429 | 4.35796  | SCF Done: E(RM11L) = -2550.38809160                      |          |          |          |
| H | 2.28304  | -4.28624 | 3.99408  | <b>gc'</b>                                               |          |          |          |
| H | 3.2167   | -2.9677  | 4.70508  | <b>Number of Negative Frequencies =0</b>                 |          |          |          |
| H | 1.54938  | -3.25067 | 5.22177  | B                                                        | -0.92496 | 2.45436  | 0.37261  |
| C | -0.08646 | -1.33954 | 4.7544   | B                                                        | 1.68561  | 1.61357  | 0.70723  |
| H | -0.60016 | -2.26633 | 5.03598  | C                                                        | -2.95402 | -0.50575 | 1.94522  |
| H | 0.59979  | -1.08477 | 5.57019  | H                                                        | -2.53772 | -0.24891 | 2.91436  |
| H | -0.84041 | -0.54863 | 4.69367  | C                                                        | -4.27466 | -0.99122 | 1.8476   |
| C | 2.84995  | -0.21425 | -2.26483 | C                                                        | -3.93839 | -1.0692  | -0.54947 |
| H | 2.42738  | 0.51017  | -2.95238 | C                                                        | -2.61892 | -0.6048  | -0.33558 |
| B | 1.33442  | 2.05361  | 0.00893  |                                                          |          |          |          |

|    |          |          |          |   |          |          |          |
|----|----------|----------|----------|---|----------|----------|----------|
| C  | -1.71698 | -0.41933 | -1.44254 | C | -0.3212  | 5.17964  | -0.99378 |
| C  | -2.14742 | -0.68818 | -2.76145 | H | 0.34421  | 4.98626  | -0.14797 |
| C  | 0.05059  | -0.04534 | -3.533   | H | 0.23375  | 4.96362  | -1.9131  |
| C  | 0.37976  | 0.19643  | -2.18452 | H | -0.60162 | 6.23875  | -1.00411 |
| H  | 1.36903  | 0.55288  | -1.92095 | C | -2.44299 | 4.49059  | -2.14434 |
| N  | -2.14767 | -0.317   | 0.90695  | H | -2.89268 | 5.49025  | -2.11765 |
| N  | -0.45547 | 0.02186  | -1.16537 | H | -1.84851 | 4.41231  | -3.06197 |
| O  | -1.53113 | 3.37126  | 1.2422   | H | -3.24421 | 3.74879  | -2.19971 |
| O  | -1.06586 | 2.90064  | -0.95212 | C | -3.72885 | 3.81113  | 0.389    |
| O  | 1.94673  | 2.99731  | 0.76173  | H | -4.10836 | 3.68217  | 1.40856  |
| O  | 2.91343  | 0.94072  | 0.49685  | H | -4.38825 | 4.50975  | -0.13795 |
| C  | -4.34983 | -1.32331 | -1.90097 | H | -3.77481 | 2.83985  | -0.11473 |
| C  | -3.49726 | -1.14091 | -2.95117 | C | -2.23943 | 5.68213  | 1.15097  |
| H  | -5.35938 | -1.67018 | -2.09172 | H | -2.72527 | 6.45142  | 0.53901  |
| H  | -3.84662 | -1.34679 | -3.95671 | H | -2.76939 | 5.62727  | 2.10887  |
| C  | -4.78589 | -1.27168 | 0.57841  | H | -1.21141 | 5.99347  | 1.3531   |
| C  | -1.22989 | -0.5082  | -3.83596 | C | 4.45641  | 1.79298  | 2.131    |
| C  | -1.54889 | 4.26288  | -0.929   | H | 4.73486  | 0.75714  | 2.35213  |
| C  | -2.28343 | 4.32421  | 0.45642  | H | 5.3249   | 2.43154  | 2.32738  |
| C  | 3.3023   | 3.24473  | 0.33365  | H | 3.65014  | 2.08118  | 2.81284  |
| C  | 4.00056  | 1.88595  | 0.66873  | C | 3.84986  | 4.45582  | 1.08422  |
| Ir | -0.12017 | 0.7029   | 0.88096  | H | 4.90952  | 4.61564  | 0.85152  |
| C  | 1.58272  | -1.82932 | 2.95933  | H | 3.30006  | 5.35613  | 0.78701  |
| C  | 0.80453  | -3.04918 | 3.56071  | H | 3.74331  | 4.34026  | 2.16592  |
| B  | 0.30146  | -2.82377 | 1.34412  | C | 3.25999  | 3.53832  | -1.17328 |
| O  | 0.33372  | -3.73865 | 2.36129  | H | 2.87183  | 2.67793  | -1.72864 |
| O  | 0.84573  | -1.60492 | 1.69629  | H | 2.58621  | 4.38213  | -1.35138 |
| H  | -0.09356 | 1.25203  | 2.39582  | H | 4.24824  | 3.79542  | -1.57006 |
| C  | 1.10525  | 0.19315  | -4.58527 | C | 5.15747  | 1.52053  | -0.25736 |
| H  | 0.72617  | 0.81355  | -5.40473 | H | 5.9218   | 2.30676  | -0.24235 |
| H  | 1.97297  | 0.70111  | -4.1572  | H | 5.62768  | 0.58905  | 0.0724   |
| H  | 1.45357  | -0.75266 | -5.01781 | H | 4.82189  | 1.38179  | -1.28778 |
| C  | -1.65524 | -0.82619 | -5.24615 | C | 1.56666  | -0.58402 | 3.82885  |
| H  | -2.01729 | -1.85893 | -5.31867 | H | 2.07322  | -0.80302 | 4.77653  |
| H  | -2.47659 | -0.17372 | -5.56848 | H | 2.09921  | 0.22557  | 3.32523  |
| H  | -0.83863 | -0.7125  | -5.96019 | H | 0.55467  | -0.23835 | 4.03742  |
| C  | -6.18898 | -1.78251 | 0.37551  | C | 3.02012  | -2.15346 | 2.54301  |
| H  | -6.771   | -1.0914  | -0.24672 | H | 3.39062  | -1.32574 | 1.93258  |
| H  | -6.18129 | -2.75024 | -0.14111 | H | 3.66841  | -2.2685  | 3.41777  |
| H  | -6.72324 | -1.91177 | 1.31767  | H | 3.07154  | -3.07268 | 1.95042  |
| C  | -5.07261 | -1.17224 | 3.11608  | C | 1.66558  | -4.01196 | 4.36813  |
| H  | -5.97142 | -0.54388 | 3.12182  | H | 2.11716  | -3.49523 | 5.22206  |
| H  | -5.40063 | -2.21099 | 3.24258  | H | 1.04827  | -4.83101 | 4.75229  |
| H  | -4.47435 | -0.90346 | 3.99231  | H | 2.4632   | -4.44407 | 3.75901  |

|                                                          |          |          |          |    |          |          |          |
|----------------------------------------------------------|----------|----------|----------|----|----------|----------|----------|
| C                                                        | -0.4465  | -2.64662 | 4.34659  | H  | -1.12489 | -0.38566 | -3.37626 |
| H                                                        | -1.04664 | -3.54222 | 4.53858  | C  | -2.4051  | -2.08524 | -2.95666 |
| H                                                        | -0.18922 | -2.19156 | 5.30806  | C  | -2.27854 | -2.80807 | -0.65018 |
| H                                                        | -1.05837 | -1.93993 | 3.77695  | C  | -1.39122 | -1.73408 | -0.40963 |
| C                                                        | -0.29409 | -3.21425 | -0.04809 | C  | -0.87416 | -1.49672 | 0.91335  |
| C                                                        | -1.59769 | -3.73963 | -0.07411 | C  | -1.23557 | -2.34182 | 1.9874   |
| C                                                        | 0.4267   | -3.14151 | -1.26321 | C  | 0.07053  | -0.92409 | 3.44728  |
| C                                                        | -2.19295 | -4.15043 | -1.26608 | C  | 0.39726  | -0.16406 | 2.30667  |
| H                                                        | -2.15671 | -3.81606 | 0.85516  | H  | 1.05588  | 0.69411  | 2.39005  |
| C                                                        | -0.17402 | -3.5691  | -2.45902 | N  | -0.9837  | -0.89394 | -1.39934 |
| C                                                        | -1.47477 | -4.0626  | -2.46348 | N  | -0.02362 | -0.44265 | 1.07631  |
| H                                                        | -3.20892 | -4.53581 | -1.26398 | O  | 2.43188  | -2.02617 | -2.02072 |
| H                                                        | 0.40092  | -3.51501 | -3.3779  | O  | 2.06665  | -2.27916 | 0.22607  |
| H                                                        | -1.9302  | -4.38319 | -3.39697 | O  | 3.86306  | 0.67377  | -0.00323 |
| C                                                        | 1.8349   | -2.68853 | -1.25597 | O  | 2.46685  | 2.2001   | 0.97073  |
| H                                                        | 2.21752  | -2.39084 | -0.27693 | C  | -2.6014  | -3.67183 | 0.45149  |
| N                                                        | 2.55272  | -2.67329 | -2.3109  | C  | -2.10365 | -3.45157 | 1.70384  |
| C                                                        | 3.98149  | -2.31333 | -2.25409 | H  | -3.26211 | -4.51584 | 0.28675  |
| C                                                        | 4.16615  | -1.0773  | -3.15296 | H  | -2.37967 | -4.12478 | 2.50772  |
| H                                                        | 3.63244  | -0.21725 | -2.73611 | C  | -2.80521 | -2.98103 | -1.96357 |
| H                                                        | 5.22815  | -0.81722 | -3.23306 | C  | -0.73665 | -2.05205 | 3.29075  |
| H                                                        | 3.77898  | -1.26733 | -4.15937 | C  | 2.88868  | -3.3979  | -0.1707  |
| C                                                        | 4.73194  | -3.51174 | -2.86704 | C  | 2.67715  | -3.42067 | -1.72504 |
| H                                                        | 4.59899  | -4.40756 | -2.24859 | C  | 4.61861  | 1.28532  | 1.0667   |
| H                                                        | 4.35218  | -3.73299 | -3.87097 | C  | 3.81245  | 2.6028   | 1.3242   |
| H                                                        | 5.80528  | -3.29946 | -2.93872 | Ir | 0.87529  | 0.2936   | -0.77313 |
| C                                                        | 4.53284  | -2.01517 | -0.85063 | C  | -0.05146 | 3.76227  | -1.29768 |
| H                                                        | 4.01608  | -1.16915 | -0.38738 | C  | -1.3445  | 4.2379   | -2.03317 |
| H                                                        | 4.44186  | -2.8854  | -0.18987 | C  | -4.25015 | 1.18729  | 2.19069  |
| H                                                        | 5.59685  | -1.76351 | -0.92157 | C  | -4.75049 | 0.38914  | 0.93181  |
| Thermal correction to Energy=1.159178                    |          |          |          | B  | -1.85551 | 2.53108  | -0.59136 |
| Thermal correction to Enthalpy=1.160329                  |          |          |          | B  | -2.90349 | 1.61453  | 0.38189  |
| Thermal correction to Gibbs Free Energy=0.939936         |          |          |          | O  | -3.60985 | 0.49264  | 0.01986  |
| Sum of electronic and zero-point Energies=-2549.279848   |          |          |          | O  | -3.28873 | 2.11697  | 1.60274  |
| Sum of electronic and thermal Energies=-2549.190895      |          |          |          | O  | -2.39692 | 3.61848  | -1.23086 |
| Sum of electronic and thermal Enthalpies=-2549.189745    |          |          |          | O  | -0.48625 | 2.44664  | -0.76698 |
| Sum of electronic and thermal Free Energies=-2549.410137 |          |          |          | H  | 1.4858   | 0.66645  | -2.22084 |
| SCF Done: E(RM11L) = -2550.43103023                      |          |          |          | C  | 0.62159  | -0.48442 | 4.78202  |
| <b>10'</b>                                               |          |          |          | H  | 1.28124  | -1.24413 | 5.21822  |
| <b>Number of Negative Frequencies =0</b>                 |          |          |          | H  | 1.20081  | 0.43814  | 4.67673  |
| B                                                        | 1.90687  | -1.41722 | -0.87155 | H  | -0.18069 | -0.29231 | 5.50447  |
| B                                                        | 2.52659  | 1.11011  | 0.07034  | C  | -1.1157  | -2.93371 | 4.45251  |
| C                                                        | -1.48293 | -1.07298 | -2.61545 | H  | -2.20059 | -2.91445 | 4.61876  |
|                                                          |          |          |          | H  | -0.8384  | -3.97737 | 4.26209  |

|   |          |          |          |                                                          |          |          |          |
|---|----------|----------|----------|----------------------------------------------------------|----------|----------|----------|
| H | -0.63212 | -2.6252  | 5.3804   | H                                                        | 0.99863  | 2.89609  | -3.00126 |
| C | -3.76662 | -4.10787 | -2.24119 | C                                                        | 0.29898  | 4.5987   | -0.06414 |
| H | -3.30561 | -5.07897 | -2.02208 | H                                                        | 1.04705  | 4.04907  | 0.51216  |
| H | -4.65911 | -4.02512 | -1.60846 | H                                                        | 0.70752  | 5.57397  | -0.34961 |
| H | -4.09691 | -4.12393 | -3.28065 | H                                                        | -0.58007 | 4.76101  | 0.56923  |
| C | -2.8997  | -2.15956 | -4.38098 | C                                                        | -1.55526 | 5.74707  | -2.0351  |
| H | -2.64362 | -3.11764 | -4.84883 | H                                                        | -0.72658 | 6.24732  | -2.54882 |
| H | -3.98939 | -2.04996 | -4.43564 | H                                                        | -2.48171 | 5.9931   | -2.56537 |
| H | -2.45461 | -1.36483 | -4.9876  | H                                                        | -1.62942 | 6.1466   | -1.02056 |
| C | 4.33073  | -3.0685  | 0.23392  | C                                                        | -1.48181 | 3.66967  | -3.44931 |
| H | 4.66917  | -2.15423 | -0.26194 | H                                                        | -2.49956 | 3.85403  | -3.80867 |
| H | 4.36354  | -2.89757 | 1.31508  | H                                                        | -0.78024 | 4.14427  | -4.14267 |
| H | 5.01993  | -3.88628 | -0.00475 | H                                                        | -1.30538 | 2.58885  | -3.45844 |
| C | 2.40404  | -4.64566 | 0.56359  | C                                                        | -5.0535  | -1.08132 | 1.18447  |
| H | 2.93141  | -5.53963 | 0.21043  | H                                                        | -5.86257 | -1.18158 | 1.91709  |
| H | 2.59532  | -4.54209 | 1.63792  | H                                                        | -5.37852 | -1.55921 | 0.25416  |
| H | 1.3296   | -4.79627 | 0.42892  | H                                                        | -4.17834 | -1.61797 | 1.55198  |
| C | 1.4177   | -4.1948  | -2.14208 | C                                                        | -5.92776 | 1.06046  | 0.21667  |
| H | 1.2103   | -3.99359 | -3.19862 | H                                                        | -6.09048 | 0.56306  | -0.74519 |
| H | 1.53961  | -5.2762  | -2.01458 | H                                                        | -6.84955 | 0.9882   | 0.80299  |
| H | 0.548    | -3.86934 | -1.56155 | H                                                        | -5.7206  | 2.11742  | 0.01878  |
| C | 3.87918  | -3.89747 | -2.53425 | C                                                        | -3.47141 | 0.32486  | 3.18489  |
| H | 4.14404  | -4.92832 | -2.27031 | H                                                        | -2.9947  | 0.97264  | 3.92783  |
| H | 3.64148  | -3.87272 | -3.60392 | H                                                        | -4.12608 | -0.37913 | 3.70926  |
| H | 4.7513   | -3.25951 | -2.36932 | H                                                        | -2.68967 | -0.23857 | 2.67405  |
| C | 4.21726  | 3.74384  | 0.38206  | C                                                        | -5.32534 | 1.99415  | 2.91013  |
| H | 3.48735  | 4.55578  | 0.46542  | H                                                        | -6.10619 | 1.33148  | 3.30045  |
| H | 5.20592  | 4.14382  | 0.63316  | H                                                        | -4.88073 | 2.52968  | 3.756    |
| H | 4.23252  | 3.40559  | -0.65863 | H                                                        | -5.78968 | 2.73086  | 2.2503   |
| C | 6.06019  | 1.48423  | 0.60705  | Thermal correction to Energy=1.113121                    |          |          |          |
| H | 6.64177  | 2.0237   | 1.36406  | Thermal correction to Enthalpy=1.114271                  |          |          |          |
| H | 6.53553  | 0.50975  | 0.44698  | Thermal correction to Gibbs Free Energy=0.896939         |          |          |          |
| H | 6.11107  | 2.03925  | -0.33325 | Sum of electronic and zero-point Energies=-2478.216262   |          |          |          |
| C | 4.57945  | 0.3244   | 2.2634   | Sum of electronic and thermal Energies=-2478.130139      |          |          |          |
| H | 3.55071  | 0.16107  | 2.6014   | Sum of electronic and thermal Enthalpies=-2478.128989    |          |          |          |
| H | 4.98624  | -0.64395 | 1.95706  | Sum of electronic and thermal Free Energies=-2478.346321 |          |          |          |
| H | 5.17183  | 0.69772  | 3.1062   | SCF Done: E(RM11L)= -2479.32152052                       |          |          |          |
| C | 3.81399  | 3.0952   | 2.76878  | <b>TS1'</b>                                              |          |          |          |
| H | 4.83292  | 3.32036  | 3.10518  | <b>Number of Negative Frequencies =1</b>                 |          |          |          |
| H | 3.22059  | 4.01325  | 2.8489   | Ir                                                       | 0.24134  | 0.15435  | -0.3536  |
| H | 3.37958  | 2.35573  | 3.44678  | B                                                        | -0.0017  | 2.00325  | -1.06982 |
| C | 1.1622   | 3.61746  | -2.20008 | H                                                        | 1.26364  | -0.00939 | -1.56828 |
| H | 1.39566  | 4.59341  | -2.64283 |                                                          |          |          |          |
| H | 2.02278  | 3.28458  | -1.61828 |                                                          |          |          |          |

|   |          |          |          |   |          |          |          |
|---|----------|----------|----------|---|----------|----------|----------|
| C | -1.76716 | -1.23743 | -2.46224 | H | -5.41229 | -2.59419 | -3.66168 |
| C | -2.96897 | -1.78553 | -2.95816 | C | -4.71972 | 1.14717  | 3.79735  |
| C | -4.02424 | -1.00457 | -0.92338 | H | -5.52775 | 1.70765  | 3.31163  |
| C | -2.76676 | -0.49826 | -0.51897 | H | -5.13477 | 0.17516  | 4.09216  |
| C | -2.61539 | 0.15737  | 0.75522  | H | -4.44662 | 1.68192  | 4.70825  |
| C | -3.73043 | 0.31883  | 1.61087  | C | -1.94094 | 2.10691  | 4.49449  |
| C | -2.2668  | 1.41583  | 3.19238  | H | -2.49971 | 3.04407  | 4.60478  |
| C | -1.22101 | 1.20373  | 2.27055  | H | -2.18548 | 1.47642  | 5.35771  |
| B | 0.65089  | -2.11942 | 0.7427   | H | -0.87444 | 2.34645  | 4.54837  |
| N | -1.65955 | -0.61146 | -1.29815 | C | 0.95275  | 4.98273  | -0.96988 |
| N | -1.36979 | 0.59348  | 1.09834  | H | 1.11317  | 5.21601  | 0.08743  |
| O | 1.38468  | -2.45226 | 1.85557  | H | 1.768    | 4.33237  | -1.29954 |
| O | -0.69629 | -2.33892 | 0.91802  | H | 0.99374  | 5.91773  | -1.53962 |
| O | 2.95022  | 1.61035  | 0.11441  | C | -1.52644 | 5.19823  | -0.65614 |
| O | 2.00035  | 0.81261  | 2.03474  | H | -1.29923 | 5.57604  | 0.34726  |
| O | 1.15168  | -2.54664 | -1.94453 | H | -1.63642 | 6.0598   | -1.32517 |
| O | 2.90683  | -1.62931 | -0.78366 | H | -2.48156 | 4.66874  | -0.60734 |
| C | -5.13492 | -0.83655 | -0.02839 | C | -2.07932 | 3.3935   | -2.88567 |
| C | -4.99546 | -0.20336 | 1.17322  | H | -2.63527 | 4.32166  | -3.05836 |
| H | -6.10829 | -1.21992 | -0.31408 | H | -2.13582 | 2.78399  | -3.79407 |
| H | -5.86098 | -0.09665 | 1.81757  | H | -2.56686 | 2.83943  | -2.07608 |
| C | -4.12503 | -1.66113 | -2.18565 | C | 0.05871  | 4.42982  | -3.69435 |
| C | -3.54839 | 0.97006  | 2.86601  | H | -0.13707 | 3.92517  | -4.64726 |
| C | -0.88412 | -3.04342 | 2.18212  | H | -0.34071 | 5.44854  | -3.76233 |
| C | 0.4657   | -2.75422 | 2.94434  | H | 1.14195  | 4.48738  | -3.56116 |
| C | 3.50716  | -2.29269 | -1.92456 | C | 5.25166  | 1.95452  | 0.76263  |
| C | 2.27251  | -2.56434 | -2.8733  | H | 5.44864  | 2.65732  | -0.05522 |
| C | 3.79262  | 2.06246  | 1.19807  | H | 5.92834  | 2.1996   | 1.59007  |
| C | 3.37839  | 1.09913  | 2.36379  | H | 5.48592  | 0.94893  | 0.40446  |
| C | -0.60438 | 3.66158  | -2.55519 | C | 3.43399  | 3.52767  | 1.47688  |
| B | 1.54566  | -1.87113 | -0.79929 | H | 3.56188  | 4.10723  | 0.55718  |
| H | -0.21199 | 1.52726  | 2.50008  | H | 2.38943  | 3.61959  | 1.79045  |
| H | -0.84738 | -1.3229  | -3.02991 | H | 4.07429  | 3.96481  | 2.25147  |
| B | 1.83849  | 0.93313  | 0.6368   | C | 4.13177  | -0.23809 | 2.33416  |
| C | -0.40167 | 4.28194  | -1.12835 | H | 5.18367  | -0.12035 | 2.61997  |
| O | -0.37937 | 3.10198  | -0.28711 | H | 3.65381  | -0.92664 | 3.03803  |
| O | 0.04059  | 2.37124  | -2.42    | H | 4.07227  | -0.69531 | 1.34206  |
| C | -2.94398 | -2.47985 | -4.29846 | C | 3.43525  | 1.7088   | 3.76154  |
| H | -1.92904 | -2.49526 | -4.70776 | H | 3.11881  | 0.96567  | 4.50254  |
| H | -3.28804 | -3.51808 | -4.22173 | H | 4.45545  | 2.02254  | 4.01273  |
| H | -3.58893 | -1.9748  | -5.02785 | H | 2.77275  | 2.57416  | 3.85075  |
| C | -5.45501 | -2.20151 | -2.64476 | C | 4.57633  | -1.37481 | -2.51111 |
| H | -5.79831 | -3.01064 | -1.98732 | H | 5.37588  | -1.22716 | -1.77663 |
| H | -6.22468 | -1.42091 | -2.6208  | H | 5.02025  | -1.81451 | -3.41186 |



|                                                          |          |          |          |   |          |          |          |
|----------------------------------------------------------|----------|----------|----------|---|----------|----------|----------|
| H                                                        | 4.16697  | -0.39382 | -2.76288 | C | -1.60347 | -1.83907 | -2.20734 |
| C                                                        | 2.03422  | -1.45771 | -3.90605 | C | -2.66218 | -2.71764 | -2.51617 |
| H                                                        | 2.83395  | -1.43425 | -4.65383 | C | -3.59894 | -2.16226 | -0.35456 |
| H                                                        | 1.08944  | -1.65021 | -4.42635 | C | -2.49776 | -1.29665 | -0.15163 |
| H                                                        | 1.96092  | -0.47769 | -3.42923 | C | -2.37322 | -0.54093 | 1.06549  |
| C                                                        | 2.28584  | -3.92327 | -3.57009 | C | -3.35203 | -0.65683 | 2.08145  |
| H                                                        | 1.38022  | -4.03245 | -4.17729 | C | -2.07859 | 0.92521  | 3.39128  |
| H                                                        | 3.15288  | -4.01167 | -4.23438 | C | -1.16081 | 0.97594  | 2.32458  |
| H                                                        | 2.30979  | -4.74686 | -2.85222 | B | 1.00416  | -1.34889 | 0.82176  |
| C                                                        | 4.15197  | -3.57359 | -1.3801  | N | -1.51481 | -1.15179 | -1.07687 |
| H                                                        | 4.88066  | -3.30166 | -0.60923 | N | -1.28427 | 0.26904  | 1.2044   |
| H                                                        | 3.40287  | -4.22401 | -0.91713 | O | 2.10453  | -1.32294 | 1.65588  |
| H                                                        | 4.67157  | -4.13521 | -2.16375 | O | 0.14307  | -2.38048 | 1.17439  |
| C                                                        | 1.02656  | -3.93856 | 3.72649  | O | 2.29291  | 2.45194  | -0.5584  |
| H                                                        | 1.97636  | -3.65267 | 4.19108  | O | 1.6865   | 1.93917  | 1.58333  |
| H                                                        | 0.33669  | -4.24125 | 4.52246  | O | 1.52754  | -2.13937 | -1.86266 |
| H                                                        | 1.21447  | -4.79933 | 3.08007  | O | 3.06712  | -0.59552 | -1.15697 |
| C                                                        | -1.07844 | -4.51848 | 1.81614  | C | -4.57525 | -2.26143 | 0.69411  |
| H                                                        | -1.2613  | -5.13399 | 2.70312  | C | -4.4566  | -1.54655 | 1.85072  |
| H                                                        | -1.94247 | -4.60898 | 1.14929  | H | -5.42724 | -2.91956 | 0.56502  |
| H                                                        | -0.20301 | -4.91265 | 1.28988  | H | -5.21674 | -1.65103 | 2.61685  |
| C                                                        | -2.13557 | -2.49886 | 2.86107  | C | -3.6812  | -2.89033 | -1.57624 |
| H                                                        | -3.0132  | -2.70797 | 2.24031  | C | -3.19314 | 0.09178  | 3.28273  |
| H                                                        | -2.2854  | -2.9799  | 3.83438  | C | 0.76095  | -3.18166 | 2.21504  |
| H                                                        | -2.07574 | -1.41999 | 3.01088  | C | 1.85585  | -2.20387 | 2.78279  |
| C                                                        | 0.4168   | -1.50996 | 3.83565  | C | 3.82258  | -1.63562 | -1.81558 |
| H                                                        | -0.2564  | -1.65419 | 4.68762  | C | 2.71588  | -2.36299 | -2.66242 |
| H                                                        | 1.4216   | -1.30841 | 4.2195   | C | 3.0241   | 3.36315  | 0.29326  |
| H                                                        | 0.10069  | -0.63334 | 3.2679   | C | 2.94485  | 2.64556  | 1.68568  |
| Thermal correction to Energy=1.111880                    |          |          |          | C | -2.34597 | 3.17128  | -2.55362 |
| Thermal correction to Enthalpy=1.113030                  |          |          |          | B | 1.72461  | -0.97277 | -1.10972 |
| Thermal correction to Gibbs Free Energy=0.900546         |          |          |          | H | -0.2736  | 1.59366  | 2.3884   |
| Sum of electronic and zero-point Energies=-2478.215129   |          |          |          | H | -0.78034 | -1.70353 | -2.89955 |
| Sum of electronic and thermal Energies=-2478.130053      |          |          |          | B | 1.45749  | 1.65241  | 0.22636  |
| Sum of electronic and thermal Enthalpies=-2478.128903    |          |          |          | C | -2.205   | 3.89355  | -1.16944 |
| Sum of electronic and thermal Free Energies=-2478.341388 |          |          |          | O | -1.63403 | 2.84832  | -0.34006 |
| SCF Done: E(RM11L) = -2479.31240022                      |          |          |          | O | -1.27417 | 2.193    | -2.49873 |
|                                                          |          |          |          | C | -2.63763 | -3.43553 | -3.84364 |
|                                                          |          |          |          | H | -1.74506 | -3.16369 | -4.41593 |
| <b>12'</b>                                               |          |          |          | H | -2.63078 | -4.52429 | -3.71293 |
| <b>Number of Negative Frequencies =0</b>                 |          |          |          | H | -3.51372 | -3.1857  | -4.45431 |
| Ir                                                       | 0.12303  | 0.26036  | -0.44913 | C | -4.84102 | -3.82341 | -1.81592 |
| B                                                        | -0.99279 | 1.91774  | -1.15877 | H | -4.86231 | -4.61912 | -1.06084 |
| H                                                        | 0.84945  | 0.49195  | -1.86655 | H | -5.797   | -3.29002 | -1.74708 |

|   |          |          |          |                                                          |          |          |          |
|---|----------|----------|----------|----------------------------------------------------------|----------|----------|----------|
| H | -4.79498 | -4.29777 | -2.79718 | H                                                        | 4.53926  | -0.23054 | -3.31974 |
| C | -4.20859 | -0.03347 | 4.38915  | C                                                        | 2.46888  | -1.70074 | -4.02373 |
| H | -5.20831 | 0.25338  | 4.04023  | H                                                        | 3.3033   | -1.86306 | -4.71445 |
| H | -4.27675 | -1.06973 | 4.7428   | H                                                        | 1.56597  | -2.13089 | -4.47121 |
| H | -3.96335 | 0.59496  | 5.24631  | H                                                        | 2.31024  | -0.62302 | -3.91302 |
| C | -1.78929 | 1.75917  | 4.61633  | C                                                        | 2.91381  | -3.86542 | -2.83252 |
| H | -2.59451 | 2.47537  | 4.81893  | H                                                        | 2.09335  | -4.28363 | -3.42663 |
| H | -1.67577 | 1.13379  | 5.51015  | H                                                        | 3.85387  | -4.0788  | -3.35439 |
| H | -0.86267 | 2.32673  | 4.48695  | H                                                        | 2.9256   | -4.37884 | -1.8676  |
| C | -1.19748 | 5.04888  | -1.19355 | C                                                        | 4.42703  | -2.52488 | -0.72269 |
| H | -1.0025  | 5.37382  | -0.16617 | H                                                        | 5.03725  | -1.90536 | -0.05748 |
| H | -0.24723 | 4.7296   | -1.63155 | H                                                        | 3.64146  | -2.98432 | -0.11886 |
| H | -1.57635 | 5.90739  | -1.75895 | H                                                        | 5.06192  | -3.31247 | -1.14342 |
| C | -3.51792 | 4.35235  | -0.54207 | C                                                        | 3.17219  | -2.86465 | 3.18009  |
| H | -3.3192  | 4.82754  | 0.42532  | H                                                        | 3.87332  | -2.10267 | 3.53813  |
| H | -4.02209 | 5.0858   | -1.18221 | H                                                        | 3.01748  | -3.5899  | 3.98727  |
| H | -4.19674 | 3.51304  | -0.37063 | H                                                        | 3.63846  | -3.37554 | 2.33439  |
| C | -3.65625 | 2.38378  | -2.691   | C                                                        | 1.34051  | -4.42486 | 1.53187  |
| H | -4.52167 | 3.0458   | -2.80559 | H                                                        | 1.80087  | -5.10858 | 2.25304  |
| H | -3.59333 | 1.74279  | -3.57695 | H                                                        | 0.53251  | -4.95726 | 1.01858  |
| H | -3.82085 | 1.73935  | -1.82086 | H                                                        | 2.08767  | -4.15022 | 0.78219  |
| C | -2.14111 | 4.0642   | -3.77345 | C                                                        | -0.31685 | -3.5932  | 3.21483  |
| H | -2.25245 | 3.47337  | -4.6897  | H                                                        | -1.05299 | -4.23474 | 2.7178   |
| H | -2.88578 | 4.86857  | -3.79707 | H                                                        | 0.11901  | -4.1573  | 4.04758  |
| H | -1.14398 | 4.51139  | -3.78143 | H                                                        | -0.84606 | -2.72778 | 3.62019  |
| C | 4.43469  | 3.52848  | -0.26656 | C                                                        | 1.34441  | -1.31952 | 3.92605  |
| H | 4.3905   | 4.03274  | -1.23874 | H                                                        | 1.18614  | -1.89505 | 4.84453  |
| H | 5.05558  | 4.13708  | 0.40187  | H                                                        | 2.0846   | -0.5384  | 4.12777  |
| H | 4.92032  | 2.56038  | -0.41283 | H                                                        | 0.40651  | -0.82687 | 3.6534   |
| C | 2.284    | 4.70575  | 0.26932  | Thermal correction to Energy=1.111563                    |          |          |          |
| H | 2.20414  | 5.05125  | -0.7668  | Thermal correction to Enthalpy=1.112713                  |          |          |          |
| H | 1.27112  | 4.59832  | 0.66852  | Thermal correction to Gibbs Free Energy=0.898620         |          |          |          |
| H | 2.81134  | 5.47359  | 0.84688  | Sum of electronic and zero-point Energies=-2478.227301   |          |          |          |
| C | 4.03659  | 1.58224  | 1.86778  | Sum of electronic and thermal Energies=-2478.141197      |          |          |          |
| H | 5.02813  | 2.0338   | 1.98693  | Sum of electronic and thermal Enthalpies=-2478.140047    |          |          |          |
| H | 3.81278  | 0.99393  | 2.76313  | Sum of electronic and thermal Free Energies=-2478.354141 |          |          |          |
| H | 4.04676  | 0.89542  | 1.01647  | SCF Done: E(RM11L)= -2479.31752685                       |          |          |          |
| C | 2.8941   | 3.5728   | 2.89546  |                                                          |          |          |          |
| H | 2.8228   | 2.97866  | 3.81404  | <b>TS<sub>13</sub>'</b>                                  |          |          |          |
| H | 3.80129  | 4.18522  | 2.95976  | <b>Number of Negative Frequencies =1</b>                 |          |          |          |
| H | 2.02708  | 4.23797  | 2.8575   | Ir                                                       | 0.18502  | 0.16523  | -0.40181 |
| C | 4.93376  | -0.98612 | -2.63568 | H                                                        | 0.41689  | 0.60245  | -1.95052 |
| H | 5.64644  | -0.4928  | -1.96506 | B                                                        | 1.97063  | -0.63032 | -1.15043 |
| H | 5.48013  | -1.73729 | -3.21822 | C                                                        | -0.86003 | -2.68226 | -1.58274 |

|   |          |          |          |   |          |          |          |
|---|----------|----------|----------|---|----------|----------|----------|
| C | -1.68743 | -3.81605 | -1.71164 | C | -3.69949 | -5.13986 | -0.90263 |
| C | -2.98449 | -2.93326 | 0.12818  | H | -3.74993 | -5.65159 | 0.06595  |
| C | -2.09326 | -1.8328  | 0.1688   | H | -4.72065 | -4.82526 | -1.15297 |
| C | -2.28587 | -0.77403 | 1.12394  | H | -3.38647 | -5.87177 | -1.64866 |
| C | -3.3671  | -0.82069 | 2.038    | C | -1.36043 | -4.82679 | -2.7842  |
| C | -2.62147 | 1.30005  | 2.92629  | H | -1.15508 | -5.8162  | -2.35817 |
| C | -1.58138 | 1.25868  | 1.97979  | H | -2.18771 | -4.94184 | -3.49489 |
| B | 1.27401  | -0.76173 | 1.22074  | H | -0.47562 | -4.51985 | -3.35084 |
| N | -1.04119 | -1.72538 | -0.68255 | C | -2.20922 | 3.67681  | -3.23458 |
| N | -1.40857 | 0.26924  | 1.10712  | H | -2.95953 | 4.04633  | -3.94206 |
| O | 2.5804   | -0.57574 | 1.66307  | H | -1.70079 | 4.53758  | -2.78848 |
| O | 0.62172  | -1.67842 | 2.04699  | H | -1.46339 | 3.09462  | -3.78561 |
| O | 1.69695  | 2.80926  | -0.9334  | C | -3.87297 | 3.67288  | -1.35639 |
| O | 1.15156  | 2.52983  | 1.26743  | H | -3.42581 | 4.6257   | -1.05171 |
| O | 2.15417  | -2.00934 | -1.31852 | H | -4.74136 | 3.89255  | -1.98818 |
| O | 3.07275  | 0.05565  | -1.643   | H | -4.21618 | 3.15854  | -0.45502 |
| C | -4.07108 | -2.954   | 1.06712  | C | -4.39044 | 0.81574  | -1.6624  |
| C | -4.2512  | -1.95148 | 1.97493  | H | -5.35287 | 1.33545  | -1.7194  |
| H | -4.76783 | -3.78516 | 1.05333  | H | -4.54643 | -0.23068 | -1.94536 |
| H | -5.08625 | -2.00655 | 2.66448  | H | -4.04261 | 0.83487  | -0.62474 |
| C | -2.76961 | -3.95485 | -0.84025 | C | -3.84944 | 1.39225  | -4.04411 |
| C | -3.53548 | 0.245    | 2.96674  | H | -4.16641 | 0.37328  | -4.29313 |
| C | 1.60423  | -2.30983 | 2.90647  | H | -4.71012 | 2.05754  | -4.17966 |
| C | 2.73397  | -1.22584 | 2.95271  | H | -3.06819 | 1.684    | -4.75035 |
| C | 4.12474  | -0.89179 | -1.94625 | C | 2.8178   | -2.42207 | -3.58321 |
| C | 3.32223  | -2.22764 | -2.14763 | H | 3.63571  | -2.63845 | -4.27878 |
| C | 1.90532  | 4.09323  | -0.30482 | H | 2.1194   | -3.26623 | -3.60453 |
| C | 1.98574  | 3.70933  | 1.21367  | H | 2.28489  | -1.53219 | -3.93448 |
| C | -3.35181 | 1.43937  | -2.60392 | C | 4.87861  | -0.40445 | -3.18067 |
| B | -1.33215 | 1.20305  | -1.52686 | H | 5.39832  | 0.53243  | -2.95077 |
| H | -0.84599 | 2.05202  | 1.92928  | H | 5.6286   | -1.13944 | -3.49598 |
| H | 0.00265  | -2.55666 | -2.22555 | H | 4.20161  | -0.21495 | -4.01766 |
| B | 1.10914  | 1.94083  | -0.00903 | C | 5.06092  | -0.92727 | -0.73281 |
| C | -2.84533 | 2.8423   | -2.11773 | H | 5.44899  | 0.08213  | -0.55696 |
| O | -1.77718 | 2.47496  | -1.20139 | H | 4.51598  | -1.23303 | 0.16294  |
| O | -2.14829 | 0.62885  | -2.49452 | H | 5.91105  | -1.5999  | -0.89284 |
| C | -2.68849 | 2.48667  | 3.85819  | C | 4.03145  | -3.48922 | -1.66487 |
| H | -2.61169 | 2.1792   | 4.90794  | H | 3.38407  | -4.35988 | -1.81954 |
| H | -1.8701  | 3.18403  | 3.65436  | H | 4.96092  | -3.65355 | -2.22243 |
| H | -3.63106 | 3.03602  | 3.74669  | H | 4.26942  | -3.43296 | -0.59969 |
| C | -4.67892 | 0.21409  | 3.94738  | C | 2.49455  | -0.15371 | 4.02243  |
| H | -5.64273 | 0.18777  | 3.42368  | H | 2.64521  | -0.54762 | 5.03365  |
| H | -4.63161 | -0.68151 | 4.57895  | H | 3.19838  | 0.66976  | 3.86337  |
| H | -4.68256 | 1.08449  | 4.60491  | H | 1.48029  | 0.25155  | 3.94899  |

|                                                          |          |          |          |   |          |          |          |
|----------------------------------------------------------|----------|----------|----------|---|----------|----------|----------|
| C                                                        | 4.15261  | -1.77397 | 3.06743  | C | -2.4876  | 0.98324  | 0.93567  |
| H                                                        | 4.87224  | -0.94779 | 3.05936  | C | -1.93938 | 2.18881  | 0.35938  |
| H                                                        | 4.27865  | -2.32503 | 4.0069   | C | -2.6743  | 3.39908  | 0.40104  |
| H                                                        | 4.39761  | -2.4426  | 2.2388   | C | -0.8315  | 4.47612  | -0.73932 |
| C                                                        | 2.03903  | -3.6003  | 2.20081  | C | -0.18327 | 3.22485  | -0.71677 |
| H                                                        | 2.75828  | -4.17252 | 2.79694  | H | 0.80802  | 3.1215   | -1.14557 |
| H                                                        | 1.15615  | -4.22661 | 2.0319   | N | -1.74995 | -0.15703 | 0.84678  |
| H                                                        | 2.48085  | -3.37377 | 1.22544  | N | -0.70144 | 2.11924  | -0.1987  |
| C                                                        | 0.95338  | -2.62671 | 4.24868  | O | 2.04668  | -0.3797  | 2.33788  |
| H                                                        | 0.16893  | -3.37981 | 4.11188  | O | 0.85151  | 1.5738   | 2.363    |
| H                                                        | 1.68905  | -3.02906 | 4.95502  | O | 2.54271  | 0.26602  | -2.28499 |
| H                                                        | 0.49319  | -1.73949 | 4.69158  | O | 3.17217  | 1.20493  | -0.29868 |
| C                                                        | 1.4255   | 4.75139  | 2.17789  | O | 0.31648  | -2.88186 | 0.58156  |
| H                                                        | 1.97794  | 5.69535  | 2.10172  | O | 2.29485  | -2.31134 | -0.39837 |
| H                                                        | 0.36832  | 4.95023  | 1.98129  | C | -4.47268 | 2.25108  | 1.59622  |
| H                                                        | 1.51467  | 4.38971  | 3.20893  | C | -3.96595 | 3.38387  | 1.02883  |
| C                                                        | 3.39242  | 3.28222  | 1.65161  | H | -5.4469  | 2.28849  | 2.07064  |
| H                                                        | 4.08379  | 4.13154  | 1.69104  | H | -4.54856 | 4.29771  | 1.06175  |
| H                                                        | 3.33307  | 2.83757  | 2.65075  | C | -4.23106 | -0.1785  | 2.20163  |
| H                                                        | 3.79773  | 2.52625  | 0.97195  | C | -2.10356 | 4.57239  | -0.17428 |
| C                                                        | 3.17163  | 4.72497  | -0.87618 | C | 1.78561  | 1.66048  | 3.46536  |
| H                                                        | 3.02631  | 4.94851  | -1.93924 | C | 2.17718  | 0.15589  | 3.67496  |
| H                                                        | 3.4084   | 5.66425  | -0.36215 | C | 2.33588  | -3.74261 | -0.22499 |
| H                                                        | 4.02911  | 4.05277  | -0.78949 | C | 1.22443  | -3.97675 | 0.85391  |
| C                                                        | 0.68429  | 4.96132  | -0.63887 | C | 3.83159  | 0.87668  | -2.51965 |
| H                                                        | 0.59683  | 5.03983  | -1.72773 | C | 4.38701  | 1.05355  | -1.06328 |
| H                                                        | -0.23301 | 4.49673  | -0.26692 | B | 1.15879  | 0.42344  | 1.61777  |
| H                                                        | 0.77469  | 5.97293  | -0.22702 | B | 2.1286   | 0.53022  | -0.96431 |
| Thermal correction to Energy=1.109659                    |          |          |          | B | 1.04388  | -1.81368 | -0.00077 |
| Thermal correction to Enthalpy=1.110809                  |          |          |          | C | 5.26468  | 2.28329  | -0.84648 |
| Thermal correction to Gibbs Free Energy=0.895619         |          |          |          | H | 5.59604  | 2.32141  | 0.19753  |
| Sum of electronic and zero-point Energies=-2478.223528   |          |          |          | H | 6.15788  | 2.24778  | -1.48181 |
| Sum of electronic and thermal Energies=-2478.137558      |          |          |          | H | 4.72247  | 3.20869  | -1.05862 |
| Sum of electronic and thermal Enthalpies=-2478.136407    |          |          |          | C | 3.58835  | 2.21391  | -3.23296 |
| Sum of electronic and thermal Free Energies=-2478.351597 |          |          |          | H | 4.52662  | 2.72395  | -3.47802 |
| SCF Done: E(RM11L) = -2479.30968299                      |          |          |          | H | 3.05013  | 2.03032  | -4.16911 |
|                                                          |          |          |          | H | 2.9792   | 2.88239  | -2.61506 |
|                                                          |          |          |          | C | 4.65369  | -0.04787 | -3.4143  |
| <b>4d'</b>                                               |          |          |          | H | 4.18647  | -0.12063 | -4.40328 |
| <b>Number of Negative Frequencies =0</b>                 |          |          |          | H | 5.67203  | 0.33631  | -3.54876 |
| Ir                                                       | 0.3177   | 0.08953  | -0.15822 | H | 4.71208  | -1.05617 | -2.99682 |
| H                                                        | -1.58188 | -2.13224 | 1.3334   | C | 5.09463  | -0.20317 | -0.53557 |
| C                                                        | -3.43527 | -1.32265 | 2.13692  | H | 6.0545   | -0.37609 | -1.03578 |
| C                                                        | -3.74619 | 1.01192  | 1.58445  | H | 5.28355  | -0.07614 | 0.53621  |

|   |          |          |          |                                                          |          |          |          |
|---|----------|----------|----------|----------------------------------------------------------|----------|----------|----------|
| H | 4.45427  | -1.08115 | -0.65816 | H                                                        | -5.79416 | -1.13252 | 3.3655   |
| C | 2.96105  | 2.52352  | 2.98764  | C                                                        | -3.82369 | -2.6351  | 2.77485  |
| H | 3.43571  | 2.07273  | 2.11131  | H                                                        | -3.90634 | -2.54139 | 3.86463  |
| H | 2.57757  | 3.50662  | 2.69105  | H                                                        | -4.78859 | -3.00026 | 2.40451  |
| H | 3.7091   | 2.67211  | 3.77453  | H                                                        | -3.0743  | -3.40396 | 2.56291  |
| C | 1.0884   | 2.31949  | 4.65152  | C                                                        | -2.21623 | -1.2565  | 1.42926  |
| H | 1.73886  | 2.32474  | 5.53424  | C                                                        | -0.21992 | 1.40994  | -3.68173 |
| H | 0.8433   | 3.35922  | 4.40604  | C                                                        | -1.25155 | 2.34325  | -3.76924 |
| H | 0.1573   | 1.80689  | 4.90743  | C                                                        | -2.55829 | 1.97433  | -3.41735 |
| C | 3.60451  | -0.07947 | 4.15935  | C                                                        | -2.82918 | 0.67757  | -2.99337 |
| H | 3.7698   | 0.38792  | 5.13747  | C                                                        | -1.79514 | -0.2737  | -2.91041 |
| H | 3.78834  | -1.15487 | 4.26335  | C                                                        | -0.48664 | 0.10768  | -3.24863 |
| H | 4.33616  | 0.31901  | 3.45205  | H                                                        | 0.80093  | 1.688    | -3.91805 |
| C | 1.18376  | -0.60212 | 4.56613  | H                                                        | -1.04252 | 3.35915  | -4.09459 |
| H | 1.4046   | -1.67322 | 4.51734  | H                                                        | -3.36119 | 2.70539  | -3.46886 |
| H | 1.24875  | -0.2848  | 5.61285  | H                                                        | 0.33014  | -0.60374 | -3.16783 |
| H | 0.15597  | -0.45417 | 4.21745  | C                                                        | -4.25778 | 0.25607  | -2.60217 |
| C | 3.74543  | -4.1456  | 0.20103  | H                                                        | -4.90688 | 1.10514  | -2.6537  |
| H | 3.79518  | -5.21612 | 0.43357  | N                                                        | -4.73357 | -0.78139 | -3.52855 |
| H | 4.45039  | -3.94324 | -0.61334 | C                                                        | -6.10424 | -1.17023 | -3.16665 |
| H | 4.07313  | -3.58059 | 1.07709  | C                                                        | -6.23019 | -1.23988 | -1.63339 |
| C | 1.9964   | -4.3724  | -1.5828  | H                                                        | -6.44579 | -2.2456  | -1.33855 |
| H | 2.70009  | -3.99596 | -2.3332  | H                                                        | -5.31051 | -0.92623 | -1.18536 |
| H | 2.06906  | -5.46557 | -1.55929 | H                                                        | -7.02176 | -0.59619 | -1.31094 |
| H | 0.98495  | -4.09576 | -1.8987  | C                                                        | -7.09562 | -0.12781 | -3.71632 |
| C | 0.47438  | -5.30062 | 0.73791  | H                                                        | -6.82977 | 0.12145  | -4.72235 |
| H | 1.1533   | -6.14408 | 0.91192  | H                                                        | -8.08564 | -0.53335 | -3.69907 |
| H | -0.31823 | -5.34371 | 1.49408  | H                                                        | -7.06025 | 0.75274  | -3.10946 |
| H | 0.00962  | -5.42752 | -0.24166 | C                                                        | -6.42285 | -2.55034 | -3.7711  |
| C | 1.73667  | -3.78936 | 2.28834  | H                                                        | -5.60804 | -2.86597 | -4.38865 |
| H | 2.25016  | -2.83008 | 2.3873   | H                                                        | -6.56895 | -3.2596  | -2.98338 |
| H | 0.87977  | -3.78478 | 2.97157  | H                                                        | -7.31295 | -2.48437 | -4.36126 |
| H | 2.40994  | -4.59986 | 2.58951  | H                                                        | -1.98089 | -1.27941 | -2.59587 |
| C | -0.12495 | 5.63951  | -1.3922  | Thermal correction to Energy=1.160912                    |          |          |          |
| H | 0.02364  | 6.47045  | -0.69248 | Thermal correction to Enthalpy=1.162062                  |          |          |          |
| H | 0.8597   | 5.33604  | -1.76181 | Thermal correction to Gibbs Free Energy=0.938808         |          |          |          |
| H | -0.69536 | 6.02785  | -2.24474 | Sum of electronic and zero-point Energies=-2549.285404   |          |          |          |
| C | -2.87679 | 5.86607  | -0.16281 | Sum of electronic and thermal Energies=-2549.195883      |          |          |          |
| H | -3.84184 | 5.74962  | -0.67109 | Sum of electronic and thermal Enthalpies=-2549.194733    |          |          |          |
| H | -3.09122 | 6.18621  | 0.86432  | Sum of electronic and thermal Free Energies=-2549.417988 |          |          |          |
| H | -2.33619 | 6.67445  | -0.65691 | SCF Done: E(RM11L)= -2550.42810349                       |          |          |          |
| C | -5.5619  | -0.16924 | 2.90921  |                                                          |          |          |          |
| H | -5.57984 | 0.58837  | 3.70203  |                                                          |          |          |          |
| H | -6.37361 | 0.07549  | 2.2127   |                                                          |          |          |          |

**TS5d'**

| Number of Negative Frequencies =1 |          |          |          |   |          |          |          |
|-----------------------------------|----------|----------|----------|---|----------|----------|----------|
|                                   |          |          |          | C | 5.29395  | 4.20705  | -1.72366 |
| Ir                                | 0.01845  | -0.13626 | -0.28289 | C | 5.23029  | 5.19404  | -2.90444 |
| O                                 | -2.10361 | -2.26452 | 0.58039  | H | 4.24353  | 5.17227  | -3.37731 |
| O                                 | -0.7242  | -1.71719 | 2.31591  | H | 5.42993  | 6.21802  | -2.56782 |
| O                                 | 2.72847  | -1.20659 | 0.77188  | H | 5.97858  | 4.92861  | -3.66085 |
| O                                 | 1.85464  | 0.44256  | 2.07984  | C | 4.98316  | 2.77501  | -2.20469 |
| C                                 | -2.72313 | -2.82602 | 1.76536  | H | 4.90288  | 2.08715  | -1.35595 |
| C                                 | -1.53859 | -2.81796 | 2.79612  | H | 4.05956  | 2.71288  | -2.78339 |
| C                                 | 3.77302  | -0.84338 | 1.70421  | H | 5.80247  | 2.42496  | -2.84426 |
| C                                 | 2.97258  | -0.09621 | 2.82652  | C | 6.71607  | 4.22137  | -1.12619 |
| B                                 | -0.98667 | -1.52284 | 0.96508  | H | 6.78405  | 3.53336  | -0.27447 |
| B                                 | 1.63508  | -0.35782 | 0.946    | H | 7.45723  | 3.91395  | -1.8733  |
| B                                 | 0.39836  | -2.00597 | -1.09615 | H | 6.97469  | 5.22509  | -0.77067 |
| O                                 | 0.15099  | -2.27517 | -2.45097 | H | 2.19745  | 2.13245  | 0.2635   |
| O                                 | 0.80398  | -3.17175 | -0.45718 | C | 4.74874  | 0.07062  | 0.95045  |
| C                                 | 0.08056  | -3.71668 | -2.61746 | H | 5.61434  | 0.34545  | 1.56346  |
| C                                 | 0.99856  | -4.21046 | -1.4485  | H | 5.11023  | -0.45551 | 0.06053  |
| C                                 | -2.43324 | 1.6113   | 0.42806  | H | 4.2488   | 0.98589  | 0.61973  |
| C                                 | -3.31959 | 2.46921  | 1.1249   | C | 4.48729  | -2.11258 | 2.1605   |
| N                                 | -1.18821 | 1.32715  | 0.90465  | H | 5.0153   | -2.56602 | 1.31395  |
| C                                 | -2.89183 | 3.05917  | 2.34977  | H | 5.2248   | -1.88788 | 2.93995  |
| C                                 | -0.80657 | 1.8843   | 2.05017  | H | 3.7802   | -2.84986 | 2.54914  |
| C                                 | -1.61038 | 2.75701  | 2.81019  | C | 3.71417  | 1.05643  | 3.49622  |
| H                                 | 0.18606  | 1.61104  | 2.38924  | H | 3.06839  | 1.52528  | 4.24776  |
| C                                 | -2.84049 | 0.99507  | -0.80954 | H | 4.6172   | 0.69773  | 4.00362  |
| C                                 | -4.13419 | 1.23479  | -1.33596 | H | 4.00194  | 1.82493  | 2.77414  |
| C                                 | -2.31367 | -0.39967 | -2.56688 | C | 2.38974  | -1.04178 | 3.88422  |
| C                                 | -4.50765 | 0.60142  | -2.55701 | H | 3.17026  | -1.47166 | 4.52169  |
| C                                 | -3.57337 | -0.22803 | -3.17763 | H | 1.69754  | -0.47926 | 4.52014  |
| H                                 | -1.57061 | -1.05203 | -3.0116  | H | 1.82172  | -1.84849 | 3.41289  |
| N                                 | -1.94936 | 0.18028  | -1.43074 | C | 0.60111  | -5.55202 | -0.84048 |
| C                                 | 0.82338  | 3.24589  | -3.17291 | H | 0.64995  | -6.34817 | -1.59259 |
| C                                 | 1.71911  | 4.06968  | -2.48732 | H | 1.28892  | -5.81104 | -0.02801 |
| C                                 | 2.23152  | 3.6491   | -1.25275 | H | -0.41116 | -5.52286 | -0.42963 |
| C                                 | 1.81014  | 2.428    | -0.7075  | C | 2.48783  | -4.21336 | -1.81315 |
| C                                 | 0.90472  | 1.5848   | -1.37678 | H | 3.07636  | -4.35737 | -0.90128 |
| C                                 | 0.43788  | 2.01482  | -2.63438 | H | 2.73158  | -5.01861 | -2.51499 |
| H                                 | 0.43024  | 3.56218  | -4.13702 | H | 2.78386  | -3.25745 | -2.25711 |
| H                                 | 2.0197   | 5.02538  | -2.90688 | C | -1.38979 | -4.11596 | -2.43146 |
| H                                 | 1.15992  | -0.0239  | -1.4561  | H | -2.00033 | -3.58993 | -3.17402 |
| H                                 | -0.24481 | 1.38231  | -3.19609 | H | -1.5386  | -5.1922  | -2.57103 |
| C                                 | 3.19361  | 4.4906   | -0.4741  | H | -1.74633 | -3.82878 | -1.43728 |
| H                                 | 2.74598  | 4.96548  | 0.41018  | C | 0.55906  | -4.07388 | -4.0198  |
| N                                 | 4.43084  | 4.74134  | -0.64522 | H | 0.59795  | -5.16141 | -4.15172 |

|                                                        |          |          |          |                                                          |          |          |          |
|--------------------------------------------------------|----------|----------|----------|----------------------------------------------------------|----------|----------|----------|
| H                                                      | -0.13712 | -3.66877 | -4.76336 | Sum of electronic and thermal Free Energies=-2549.356729 |          |          |          |
| H                                                      | 1.54977  | -3.66096 | -4.22611 | SCF Done: E(RM11L) = -2550.35424267                      |          |          |          |
| C                                                      | -3.2715  | -4.20744 | 1.42261  |                                                          |          |          |          |
| H                                                      | -3.67753 | -4.69931 | 2.31415  | <b>6d'</b>                                               |          |          |          |
| H                                                      | -4.07955 | -4.11478 | 0.68801  | <b>Number of Negative Frequencies =0</b>                 |          |          |          |
| H                                                      | -2.49891 | -4.84983 | 0.99198  | B                                                        | 1.28657  | -0.19793 | 1.43493  |
| C                                                      | -0.66303 | -4.07459 | 2.72097  | B                                                        | 1.37829  | -1.52873 | -1.24178 |
| H                                                      | 0.22954  | -3.92005 | 3.33707  | B                                                        | -0.41107 | -1.56606 | 1.17926  |
| H                                                      | -1.18735 | -4.96242 | 3.09129  | C                                                        | -2.50271 | 1.32991  | 0.99621  |
| H                                                      | -0.33158 | -4.2502  | 1.69391  | H                                                        | -2.85879 | 0.3172   | 1.12982  |
| C                                                      | -1.94007 | -2.53581 | 4.24022  | C                                                        | -3.29478 | 2.42066  | 1.41291  |
| H                                                      | -2.61518 | -3.31289 | 4.61745  | C                                                        | -2.79329 | 3.71098  | 1.24371  |
| H                                                      | -1.04757 | -2.52461 | 4.87569  | C                                                        | -1.48583 | 3.85353  | 0.69548  |
| H                                                      | -2.43369 | -1.56563 | 4.34015  | C                                                        | -0.77229 | 2.68877  | 0.32088  |
| C                                                      | -3.86796 | -1.88025 | 2.15097  | C                                                        | 0.56686  | 2.79334  | -0.19626 |
| H                                                      | -4.54961 | -1.78224 | 1.29908  | C                                                        | 1.19035  | 4.05869  | -0.32038 |
| H                                                      | -4.43789 | -2.25538 | 3.00796  | C                                                        | 2.53632  | 4.12689  | -0.78191 |
| H                                                      | -3.48688 | -0.88246 | 2.39277  | C                                                        | 3.18686  | 2.93017  | -1.08408 |
| C                                                      | -4.62133 | 2.69516  | 0.56251  | C                                                        | 2.47866  | 1.7218   | -0.94411 |
| C                                                      | -5.00975 | 2.10677  | -0.6056  | H                                                        | 2.94673  | 0.77559  | -1.1843  |
| H                                                      | -6.00389 | 2.303    | -0.99124 | C                                                        | 3.1992   | -0.27511 | 2.71796  |
| H                                                      | -5.31432 | 3.34769  | 1.08138  | C                                                        | 2.23124  | 0.83282  | 3.26951  |
| C                                                      | -1.0412  | 3.31243  | 4.09354  | C                                                        | 2.3208   | -3.49303 | -2.00251 |
| H                                                      | -1.00177 | 4.40818  | 4.07677  | C                                                        | 3.14638  | -2.27318 | -2.5427  |
| H                                                      | -1.64397 | 3.02029  | 4.96192  | C                                                        | -1.67055 | -2.44282 | 2.90777  |
| H                                                      | -0.02326 | 2.94467  | 4.25597  | C                                                        | -0.71363 | -3.53899 | 2.32123  |
| C                                                      | -3.81865 | 3.97501  | 3.10669  | Ir                                                       | 0.08518  | -0.21899 | -0.35576 |
| H                                                      | -4.11118 | 4.83337  | 2.48952  | N                                                        | -1.29571 | 1.44329  | 0.45903  |
| H                                                      | -4.7408  | 3.45205  | 3.38913  | N                                                        | 1.21551  | 1.64189  | -0.53    |
| H                                                      | -3.36329 | 4.36153  | 4.01926  | O                                                        | 2.6177   | -0.57528 | 1.42149  |
| C                                                      | -3.84651 | -0.95968 | -4.4696  | O                                                        | 0.98499  | 0.51605  | 2.58762  |
| H                                                      | -4.68593 | -1.6583  | -4.36849 | O                                                        | 1.09813  | -2.85764 | -1.55786 |
| H                                                      | -4.09397 | -0.26775 | -5.28357 | O                                                        | 2.65094  | -1.19247 | -1.71278 |
| H                                                      | -2.96952 | -1.53634 | -4.78002 | O                                                        | -1.61343 | -1.42206 | 1.87871  |
| C                                                      | -5.87947 | 0.83547  | -3.13612 | O                                                        | 0.23025  | -2.73959 | 1.56274  |
| H                                                      | -6.66057 | 0.51623  | -2.43519 | H                                                        | -0.84826 | -1.52601 | -0.46754 |
| H                                                      | -6.04437 | 1.90116  | -3.33708 | C                                                        | -0.64217 | 0.24802  | -2.34991 |
| H                                                      | -6.03043 | 0.29346  | -4.07063 | C                                                        | 0.26522  | 0.73658  | -3.31754 |
| Thermal correction to Energy=1.155523                  |          |          |          | C                                                        | -0.12346 | 1.15411  | -4.59125 |
| Thermal correction to Enthalpy=1.156673                |          |          |          | H                                                        | 0.62428  | 1.51837  | -5.29399 |
| Thermal correction to Gibbs Free Energy=0.932200       |          |          |          | C                                                        | -1.4709  | 1.09263  | -4.96483 |
| Sum of electronic and zero-point Energies=-2549.222787 |          |          |          | H                                                        | -1.79    | 1.41685  | -5.95271 |
| Sum of electronic and thermal Energies=-2549.133405    |          |          |          | C                                                        | -2.39257 | 0.58854  | -4.05693 |
| Sum of electronic and thermal Enthalpies=-2549.132255  |          |          |          | C                                                        | -1.99953 | 0.15951  | -2.77042 |

|   |          |          |          |   |          |          |          |
|---|----------|----------|----------|---|----------|----------|----------|
| C | -0.84148 | 5.12474  | 0.52481  | C | -1.14582 | -1.81076 | 4.20117  |
| C | 0.43208  | 5.22161  | 0.04581  | H | -1.75898 | -0.9359  | 4.44316  |
| H | 0.88684  | 6.2005   | -0.05437 | H | -1.19494 | -2.51029 | 5.04251  |
| H | -1.37505 | 6.02898  | 0.7953   | H | -0.11614 | -1.46792 | 4.07615  |
| C | -4.64139 | 2.13708  | 2.03239  | C | -3.12028 | -2.88202 | 3.08549  |
| H | -4.81596 | 1.05949  | 2.1038   | H | -3.18633 | -3.70973 | 3.80105  |
| H | -4.71206 | 2.55394  | 3.04428  | H | -3.71527 | -2.04893 | 3.47639  |
| H | -5.45887 | 2.56984  | 1.44374  | H | -3.56616 | -3.20108 | 2.14122  |
| C | -3.58176 | 4.93326  | 1.63814  | C | 2.81424  | -1.91503 | -3.99587 |
| H | -3.08726 | 5.47347  | 2.45542  | H | 3.27226  | -0.95032 | -4.23961 |
| H | -3.66774 | 5.63047  | 0.79633  | H | 3.20003  | -2.66357 | -4.69637 |
| H | -4.59144 | 4.68298  | 1.96686  | H | 1.73385  | -1.81958 | -4.13933 |
| C | 4.61993  | 2.86413  | -1.55426 | C | 4.65681  | -2.37805 | -2.35625 |
| H | 5.30493  | 3.30234  | -0.8186  | H | 5.05826  | -3.2385  | -2.90416 |
| H | 4.92599  | 1.8263   | -1.71784 | H | 5.14189  | -1.47453 | -2.74379 |
| H | 4.76099  | 3.40662  | -2.4967  | H | 4.9261   | -2.47789 | -1.30165 |
| C | 3.21842  | 5.46362  | -0.91244 | C | 1.97504  | -4.5503  | -3.04609 |
| H | 2.65623  | 6.1261   | -1.58159 | H | 2.88375  | -4.99645 | -3.46709 |
| H | 3.28018  | 5.96686  | 0.06058  | H | 1.38923  | -5.35127 | -2.58115 |
| H | 4.23156  | 5.37468  | -1.30639 | H | 1.38149  | -4.13009 | -3.86216 |
| C | 4.64152  | 0.1746   | 2.5089   | C | 2.95955  | -4.1468  | -0.77064 |
| H | 5.0937   | 0.48937  | 3.45643  | H | 2.24185  | -4.84446 | -0.32719 |
| H | 5.23236  | -0.6576  | 2.11041  | H | 3.86763  | -4.70285 | -1.02904 |
| H | 4.70619  | 1.0028   | 1.79832  | H | 3.20621  | -3.39386 | -0.016   |
| C | 3.15751  | -1.57405 | 3.52847  | H | 1.3226   | 0.77662  | -3.07347 |
| H | 3.71094  | -2.34835 | 2.98677  | C | -3.87931 | 0.46707  | -4.4396  |
| H | 3.61103  | -1.4529  | 4.51812  | H | -4.02964 | 0.87079  | -5.41905 |
| H | 2.1284   | -1.92348 | 3.64577  | N | -4.27436 | -0.9488  | -4.42727 |
| C | 1.99242  | 0.7915   | 4.77517  | C | -5.67307 | -1.07106 | -4.86265 |
| H | 2.92895  | 0.95721  | 5.31997  | C | -6.25527 | -2.40206 | -4.35168 |
| H | 1.28937  | 1.58205  | 5.06039  | H | -5.48632 | -2.96376 | -3.86372 |
| H | 1.57063  | -0.16463 | 5.09312  | H | -7.04584 | -2.20288 | -3.65869 |
| C | 2.62246  | 2.25125  | 2.83831  | H | -6.63818 | -2.96431 | -5.1776  |
| H | 1.80499  | 2.93677  | 3.08478  | C | -5.73642 | -1.04    | -6.40104 |
| H | 3.52581  | 2.59347  | 3.35458  | H | -4.97538 | -1.67619 | -6.80226 |
| H | 2.7958   | 2.30391  | 1.7603   | H | -6.69634 | -1.38379 | -6.72549 |
| C | 0.05109  | -4.35223 | 3.35905  | H | -5.58156 | -0.03843 | -6.74423 |
| H | 0.71203  | -5.06639 | 2.85566  | C | -6.49283 | 0.10078  | -4.29136 |
| H | 0.66735  | -3.71487 | 3.99705  | H | -7.23601 | -0.27729 | -3.6208  |
| H | -0.6407  | -4.91827 | 3.9935   | H | -5.84268 | 0.76728  | -3.76413 |
| C | -1.41134 | -4.47161 | 1.32342  | H | -6.96938 | 0.62656  | -5.09221 |
| H | -0.65308 | -5.06297 | 0.80006  | H | -2.74953 | -0.26681 | -2.13745 |
| H | -2.10102 | -5.15822 | 1.82607  |   |          |          |          |
| H | -1.96884 | -3.90063 | 0.57365  |   |          |          |          |

Thermal correction to Energy=1.158587

Thermal correction to Enthalpy=1.159737



|                                                          |          |          |          |   |          |          |          |
|----------------------------------------------------------|----------|----------|----------|---|----------|----------|----------|
| Thermal correction to Gibbs Free Energy=0.938184         |          |          |          | H | 5.13717  | -3.17359 | -1.96335 |
| Sum of electronic and zero-point Energies=-2549.257931   |          |          |          | C | 4.47679  | -0.99159 | -3.57194 |
| Sum of electronic and thermal Energies=-2549.168769      |          |          |          | H | 5.57004  | -1.05989 | -3.52757 |
| Sum of electronic and thermal Enthalpies=-2549.167619    |          |          |          | H | 4.12929  | -1.65129 | -4.37475 |
| Sum of electronic and thermal Free Energies=-2549.389172 |          |          |          | H | 4.19938  | 0.03203  | -3.83522 |
| SCF Done: E(RM11L) = -2550.39621086                      |          |          |          | C | 4.61242  | 0.89843  | -1.39052 |
|                                                          |          |          |          | H | 4.71816  | 1.49946  | -0.48258 |
| <b>7d'</b>                                               |          |          |          | H | 5.56133  | 0.93403  | -1.93606 |
| <b>Number of Negative Frequencies =0</b>                 |          |          |          | H | 3.83559  | 1.35841  | -2.00647 |
| Ir                                                       | -0.08865 | -0.36403 | -0.77302 | C | 5.32272  | -1.1294  | -0.10575 |
| B                                                        | 1.94052  | -0.75468 | -1.12044 | H | 6.27303  | -1.21837 | -0.64464 |
| B                                                        | 0.5292   | -2.04442 | 0.3354   | H | 5.48208  | -0.47057 | 0.75527  |
| O                                                        | 2.41777  | -1.22287 | -2.33626 | H | 5.04393  | -2.11604 | 0.2716   |
| O                                                        | 2.99839  | -0.48201 | -0.25474 | C | 2.59836  | -4.92269 | 0.8109   |
| C                                                        | -1.87137 | 2.43153  | 2.19007  | H | 2.73132  | -5.61218 | 1.65291  |
| C                                                        | -0.01091 | 1.47312  | 3.39537  | H | 2.55649  | -5.51595 | -0.10875 |
| C                                                        | 0.3081   | 0.77673  | 2.21321  | H | 3.47614  | -4.27595 | 0.75777  |
| H                                                        | 1.16321  | 0.11661  | 2.18871  | C | 0.10623  | -5.08523 | 0.92688  |
| C                                                        | -3.4474  | 2.47659  | -0.20903 | H | -0.82897 | -4.5301  | 1.0109   |
| N                                                        | -1.93478 | 0.82341  | -1.12501 | H | 0.09997  | -5.59611 | -0.04156 |
| N                                                        | -0.3865  | 0.85489  | 1.08505  | H | 0.15226  | -5.84119 | 1.71816  |
| O                                                        | 0.4594   | -2.08127 | 1.73231  | C | 0.64277  | -3.74633 | 3.47382  |
| O                                                        | 1.1498   | -3.20533 | -0.13132 | H | 1.19793  | -4.62418 | 3.82364  |
| C                                                        | -2.29699 | 1.65801  | -0.11806 | H | 0.65545  | -2.99578 | 4.27214  |
| C                                                        | -1.48948 | 1.65274  | 1.07188  | H | -0.39645 | -4.03473 | 3.30141  |
| O                                                        | -2.55332 | -1.28653 | 0.81157  | C | 2.65663  | -2.57174 | 2.54522  |
| O                                                        | -2.04783 | -2.90195 | -0.71754 | H | 3.34352  | -3.32223 | 2.9512   |
| C                                                        | -3.78119 | 3.29223  | 0.92469  | H | 3.10145  | -2.11483 | 1.65765  |
| C                                                        | -3.03542 | 3.2642   | 2.06694  | H | 2.52957  | -1.78642 | 3.29934  |
| H                                                        | -4.65439 | 3.93305  | 0.87619  | C | -4.27135 | -2.57517 | -1.54635 |
| H                                                        | -3.33223 | 3.88198  | 2.90706  | H | -3.97095 | -3.09361 | -2.46305 |
| C                                                        | -4.23086 | 2.43271  | -1.39835 | H | -5.34397 | -2.73609 | -1.39484 |
| C                                                        | -1.10259 | 2.34167  | 3.38509  | H | -4.09509 | -1.50512 | -1.69184 |
| C                                                        | 1.30496  | -4.13179 | 0.97728  | C | -3.69023 | -4.61489 | -0.21521 |
| C                                                        | 1.28341  | -3.16936 | 2.21585  | H | -3.52544 | -5.11987 | -1.1734  |
| C                                                        | -3.44584 | -3.11757 | -0.37371 | H | -3.01906 | -5.0629  | 0.52063  |
| C                                                        | -3.60805 | -2.27181 | 0.94439  | H | -4.72428 | -4.80519 | 0.09448  |
| C                                                        | 3.84809  | -1.42502 | -2.24931 | C | -3.32026 | -3.06437 | 2.22304  |
| C                                                        | 4.24278  | -0.53896 | -1.00778 | H | -3.27422 | -2.36966 | 3.06831  |
| H                                                        | -0.12128 | -1.21044 | -2.1097  | H | -4.10041 | -3.80575 | 2.42604  |
| C                                                        | -3.8314  | 1.56907  | -2.42101 | H | -2.35648 | -3.57501 | 2.15932  |
| C                                                        | 4.07257  | -2.92267 | -2.02676 | C | -4.9392  | -1.53567 | 1.07599  |
| H                                                        | 3.56488  | -3.24866 | -1.11891 | H | -5.77577 | -2.24332 | 1.10084  |
| H                                                        | 3.63716  | -3.47561 | -2.86622 | H | -4.95178 | -0.96313 | 2.01011  |

|   |          |          |          |
|---|----------|----------|----------|
| H | -5.09682 | -0.83505 | 0.25207  |
| C | -4.58896 | 1.41924  | -3.71782 |
| H | -4.62673 | 2.36386  | -4.27302 |
| H | -4.11227 | 0.67346  | -4.36138 |
| H | -5.62335 | 1.09949  | -3.54495 |
| C | -5.45689 | 3.29978  | -1.51872 |
| H | -6.19048 | 3.04853  | -0.74256 |
| H | -5.20023 | 4.358    | -1.38787 |
| H | -5.94625 | 3.19217  | -2.48748 |
| C | -1.47444 | 3.17113  | 4.58674  |
| H | -1.4924  | 4.23777  | 4.33284  |
| H | -2.4751  | 2.90946  | 4.95263  |
| H | -0.77278 | 3.03825  | 5.41135  |
| C | 0.86405  | 1.2664   | 4.6073   |
| H | 1.38482  | 2.18882  | 4.89114  |
| H | 0.2786   | 0.93846  | 5.47406  |
| H | 1.62369  | 0.50347  | 4.4113   |
| C | -2.67662 | 0.78692  | -2.22507 |
| H | -2.34733 | 0.09708  | -2.99338 |
| B | -1.6216  | -1.72882 | -0.11569 |
| C | 1.38298  | 2.48922  | -1.44204 |
| C | 0.75576  | 1.30658  | -1.91649 |
| C | 0.42998  | 1.29524  | -3.29349 |
| C | 0.64767  | 2.37961  | -4.14237 |
| C | 1.2288   | 3.54954  | -3.64006 |
| C | 1.60051  | 3.588    | -2.30355 |
| H | -0.01567 | 0.39984  | -3.71755 |
| H | 0.3727   | 2.30983  | -5.19332 |
| H | 1.4111   | 4.40392  | -4.28782 |
| C | 2.29489  | 4.83339  | -1.7218  |
| H | 2.32766  | 5.60305  | -2.46439 |
| N | 1.54337  | 5.31219  | -0.55267 |
| C | 1.59787  | 6.78033  | -0.50279 |
| C | 0.76307  | 7.36453  | -1.65754 |
| H | 0.50682  | 8.37919  | -1.43461 |
| H | 1.33332  | 7.33121  | -2.5623  |
| H | -0.13094 | 6.78909  | -1.77801 |
| C | 3.05975  | 7.24471  | -0.6401  |
| H | 3.43029  | 7.54433  | 0.31794  |
| H | 3.65567  | 6.44002  | -1.01726 |
| H | 3.10903  | 8.07244  | -1.31637 |
| C | 1.02788  | 7.26981  | 0.8415   |
| H | 0.35499  | 6.53533  | 1.23221  |
| H | 1.8291   | 7.42365  | 1.5338   |

|                                                          |         |         |          |
|----------------------------------------------------------|---------|---------|----------|
| H                                                        | 0.50352 | 8.19054 | 0.69251  |
| H                                                        | 1.78582 | 2.56658 | -0.45379 |
| Thermal correction to Energy=1.159234                    |         |         |          |
| Thermal correction to Enthalpy=1.160384                  |         |         |          |
| Thermal correction to Gibbs Free Energy=0.939254         |         |         |          |
| Sum of electronic and zero-point Energies=-2549.258827   |         |         |          |
| Sum of electronic and thermal Energies=-2549.169730      |         |         |          |
| Sum of electronic and thermal Enthalpies=-2549.168580    |         |         |          |
| Sum of electronic and thermal Free Energies=-2549.389710 |         |         |          |
| SCF Done: E(RM11L) = -2550.39459666                      |         |         |          |

### TS8d'

#### Number of Negative Frequencies =1

|    |          |          |          |
|----|----------|----------|----------|
| Ir | 0.15681  | 0.44253  | -0.69875 |
| B  | -1.82932 | 0.18699  | -1.4045  |
| B  | -1.06443 | 1.80141  | 0.28538  |
| O  | -2.22556 | 0.55795  | -2.69183 |
| O  | -2.95228 | -0.18031 | -0.65153 |
| C  | 2.4065   | -2.30335 | 2.00927  |
| C  | 0.648    | -1.479   | 3.44274  |
| C  | 0.20161  | -0.71899 | 2.34239  |
| H  | -0.65525 | -0.06581 | 2.4395   |
| C  | 3.83871  | -2.02934 | -0.46391 |
| N  | 2.16039  | -0.4241  | -1.1501  |
| N  | 0.77611  | -0.71981 | 1.14606  |
| O  | -1.15706 | 1.83062  | 1.6834   |
| O  | -1.87217 | 2.80146  | -0.25311 |
| C  | 2.64123  | -1.30845 | -0.24103 |
| C  | 1.91083  | -1.45564 | 0.98974  |
| O  | 2.3161   | 1.82592  | 0.96995  |
| O  | 1.42856  | 3.35141  | -0.47817 |
| C  | 4.27519  | -2.93616 | 0.56029  |
| C  | 3.59406  | -3.06418 | 1.7359   |
| H  | 5.17482  | -3.52009 | 0.40255  |
| H  | 3.96904  | -3.74412 | 2.49279  |
| C  | 4.56031  | -1.80518 | -1.67198 |
| C  | 1.7342   | -2.3351  | 3.26536  |
| C  | -2.36481 | 3.64194  | 0.82156  |
| C  | -2.26005 | 2.68904  | 2.06269  |
| C  | 2.69149  | 3.91672  | -0.0318  |
| C  | 2.99728  | 3.07399  | 1.2568   |
| C  | -3.668   | 0.53601  | -2.78291 |
| C  | -4.07773 | -0.35339 | -1.54845 |
| H  | 0.04923  | 1.29386  | -2.02698 |

|   |          |          |          |   |          |          |          |
|---|----------|----------|----------|---|----------|----------|----------|
| C | 4.05551  | -0.87102 | -2.57945 | H | 1.29669  | 3.84795  | 2.37658  |
| C | -4.14383 | 1.98788  | -2.67558 | C | 4.47416  | 2.77592  | 1.49947  |
| H | -3.80501 | 2.42769  | -1.73701 | H | 5.04402  | 3.70271  | 1.63307  |
| H | -3.69891 | 2.56551  | -3.49358 | H | 4.58393  | 2.17595  | 2.40991  |
| H | -5.23384 | 2.07021  | -2.75127 | H | 4.9119   | 2.21212  | 0.67178  |
| C | -4.0593  | -0.0438  | -4.14131 | C | 4.73965  | -0.53188 | -3.88093 |
| H | -5.14771 | -0.14767 | -4.22303 | H | 4.83011  | -1.41152 | -4.52926 |
| H | -3.72332 | 0.62841  | -4.93882 | H | 4.17526  | 0.22898  | -4.42876 |
| H | -3.6011  | -1.02127 | -4.31174 | H | 5.751    | -0.14227 | -3.71494 |
| C | -4.17295 | -1.84821 | -1.8819  | C | 5.83902  | -2.55925 | -1.93174 |
| H | -4.27554 | -2.41683 | -0.95188 | H | 6.58399  | -2.34306 | -1.15595 |
| H | -5.04054 | -2.06244 | -2.51509 | H | 5.66346  | -3.64166 | -1.91648 |
| H | -3.27269 | -2.20322 | -2.3891  | H | 6.27956  | -2.30675 | -2.89704 |
| C | -5.34734 | 0.09088  | -0.82673 | C | 2.21575  | -3.25429 | 4.35796  |
| H | -6.21683 | 0.01285  | -1.48963 | H | 2.28304  | -4.28624 | 3.99408  |
| H | -5.52422 | -0.55633 | 0.03969  | H | 3.2167   | -2.9677  | 4.70508  |
| H | -5.27437 | 1.12066  | -0.46978 | H | 1.54938  | -3.25067 | 5.22177  |
| C | -3.78096 | 4.10669  | 0.49697  | C | -0.08646 | -1.33954 | 4.7544   |
| H | -4.18883 | 4.69639  | 1.3264   | H | -0.60016 | -2.26633 | 5.03598  |
| H | -3.77105 | 4.74062  | -0.39627 | H | 0.59979  | -1.08477 | 5.57019  |
| H | -4.4524  | 3.26648  | 0.30774  | H | -0.84041 | -0.54863 | 4.69367  |
| C | -1.42293 | 4.8485   | 0.90545  | C | 2.84995  | -0.21425 | -2.26483 |
| H | -0.39856 | 4.52256  | 1.09616  | H | 2.42738  | 0.51017  | -2.95238 |
| H | -1.42741 | 5.37002  | -0.05745 | B | 1.33442  | 2.05361  | 0.00893  |
| H | -1.73156 | 5.55513  | 1.68345  | C | -0.87708 | -2.66682 | -1.05458 |
| C | -1.91435 | 3.37571  | 3.3798   | C | -0.5041  | -1.45862 | -1.69758 |
| H | -2.68866 | 4.10148  | 3.65407  | C | -0.07242 | -1.56482 | -3.0385  |
| H | -1.84997 | 2.63036  | 4.18074  | C | 0.06524  | -2.78586 | -3.69329 |
| H | -0.95349 | 3.89304  | 3.32469  | C | -0.25526 | -3.97256 | -3.02015 |
| C | -3.48194 | 1.77897  | 2.23932  | C | -0.73673 | -3.9031  | -1.71989 |
| H | -4.36954 | 2.33835  | 2.55418  | H | 0.16463  | -0.65345 | -3.5796  |
| H | -3.6978  | 1.24444  | 1.31105  | H | 0.41407  | -2.81539 | -4.72361 |
| H | -3.25859 | 1.03297  | 3.01069  | H | -0.15376 | -4.93459 | -3.51699 |
| C | 3.70301  | 3.6761   | -1.16004 | C | -1.16358 | -5.18079 | -0.97364 |
| H | 3.32566  | 4.13472  | -2.0801  | H | -2.21341 | -5.14137 | -0.7706  |
| H | 4.67959  | 4.11617  | -0.93117 | N | -0.86932 | -6.35599 | -1.80624 |
| H | 3.83651  | 2.60512  | -1.34752 | C | -2.11086 | -7.10195 | -2.05726 |
| C | 2.50979  | 5.41322  | 0.19864  | C | -3.0941  | -6.21319 | -2.84144 |
| H | 2.26741  | 5.90633  | -0.74923 | H | -3.47958 | -5.45196 | -2.1958  |
| H | 1.69922  | 5.6214   | 0.90073  | H | -2.58456 | -5.75806 | -3.66493 |
| H | 3.43233  | 5.85975  | 0.58736  | H | -3.90132 | -6.81202 | -3.20844 |
| C | 2.36184  | 3.65048  | 2.52651  | C | -2.74563 | -7.50889 | -0.71448 |
| H | 2.45513  | 2.91688  | 3.33455  | H | -3.32306 | -8.39971 | -0.84836 |
| H | 2.85295  | 4.5772   | 2.84212  | H | -1.97413 | -7.68867 | 0.0048   |

|                                                          |          |          |          |   |         |         |         |
|----------------------------------------------------------|----------|----------|----------|---|---------|---------|---------|
| H                                                        | -3.38076 | -6.72104 | -0.3669  | H | 3.2978  | -0.5793 | 0.0337  |
| C                                                        | -1.79352 | -8.36524 | -2.87883 | C | 3.0923  | 0.9835  | -3.052  |
| H                                                        | -1.09745 | -8.97473 | -2.34133 | H | 4.1403  | 0.9482  | -3.3688 |
| H                                                        | -2.69475 | -8.91688 | -3.04726 | H | 2.4574  | 0.8862  | -3.9347 |
| H                                                        | -1.36786 | -8.08185 | -3.81872 | H | 2.9106  | 1.9665  | -2.6081 |
| H                                                        | -1.34374 | -2.66164 | -0.09172 | C | -2.6834 | 2.2044  | 0.0392  |
| Thermal correction to Energy=1.157137                    |          |          |          | H | -3.4387 | 1.6208  | -0.4925 |
| Thermal correction to Enthalpy=1.158287                  |          |          |          | H | -2.886  | 2.1079  | 1.1044  |
| Thermal correction to Gibbs Free Energy=0.938176         |          |          |          | H | -2.7891 | 3.2539  | -0.2545 |
| Sum of electronic and zero-point Energies=-2549.252004   |          |          |          | C | -0.5393 | 3.1693  | 1.6803  |
| Sum of electronic and thermal Energies=-2549.163493      |          |          |          | H | 0.3511  | 3.4965  | 2.224   |
| Sum of electronic and thermal Enthalpies=-2549.162343    |          |          |          | H | -1.1254 | 4.052   | 1.4083  |
| Sum of electronic and thermal Free Energies=-2549.382454 |          |          |          | H | -1.1344 | 2.5447  | 2.3506  |
| SCF Done: E(RM11L) = -2550.38863846                      |          |          |          | C | 0.8093  | 3.2254  | -0.4419 |

## TS<sub>2</sub>

### Number of Negative Frequencies =1

|    |         |         |         |   |          |          |          |
|----|---------|---------|---------|---|----------|----------|----------|
| Ir | -0.8444 | -1.9253 | -0.5702 | H | 1.6334   | 3.6242   | 0.1564   |
| B  | 0.9699  | -1.4526 | -1.4969 | H | 1.2276   | 2.6212   | -1.2461  |
| O  | 1.9994  | -2.308  | -1.887  | H | 0.2583   | 4.0669   | -0.874   |
| O  | 1.3797  | -0.1322 | -1.7531 | C | -1.1575  | 1.6421   | -1.8538  |
| C  | 3.0491  | -1.5728 | -2.547  | H | -0.2051  | 1.2087   | -2.1496  |
| C  | 2.8032  | -0.1126 | -2.0286 | H | -1.9567  | 1.0088   | -2.2514  |
| O  | 0.7002  | 1.2657  | 0.9532  | H | -1.2658  | 2.6439   | -2.2809  |
| C  | -0.0976 | 2.3771  | 0.4449  | C | 3.3256   | -3.3134  | 2.5679   |
| B  | -0.0021 | 0.1009  | 0.8225  | H | 3.011    | -4.1506  | 1.9486   |
| C  | -1.2959 | 1.6852  | -0.3326 | H | 4.212    | -2.8622  | 2.1114   |
| B  | 0.4784  | -1.4619 | 1.3995  | H | 3.6042   | -3.6893  | 3.5584   |
| O  | -1.2096 | 0.3083  | 0.161   | C | 2.7276   | -1.0257  | 3.4147   |
| O  | 1.8365  | -1.8495 | 1.3515  | H | 3.0927   | -1.264   | 4.4188   |
| O  | -0.0932 | -1.9571 | 2.5923  | H | 3.5486   | -0.5892  | 2.8393   |
| C  | 2.2176  | -2.2741 | 2.6775  | H | 1.9381   | -0.2732  | 3.493    |
| C  | 0.8642  | -2.8143 | 3.2548  | C | 0.6829   | -2.6422  | 4.7616   |
| C  | 4.3864  | -2.1877 | -2.1407 | H | 1.4523   | -3.1942  | 5.3121   |
| H  | 4.4489  | -3.2112 | -2.5231 | H | 0.7273   | -1.5911  | 5.0542   |
| H  | 5.2245  | -1.6156 | -2.5528 | H | -0.2952  | -3.0349  | 5.0554   |
| H  | 4.4847  | -2.224  | -1.0543 | C | 0.5724   | -4.2613  | 2.849    |
| C  | 2.8294  | -1.7282 | -4.0555 | H | -0.4557  | -4.5063  | 3.1132   |
| H  | 2.7816  | -2.7923 | -4.2984 | H | 0.6833   | -4.389   | 1.7743   |
| H  | 1.8781  | -1.2826 | -4.3524 | H | 1.24     | -4.9627  | 3.3598   |
| H  | 3.6356  | -1.2657 | -4.6336 | C | -2.47312 | -4.03104 | -1.44211 |
| C  | 3.5171  | 0.1921  | -0.7063 | C | -2.94582 | -5.10255 | -2.24363 |
| H  | 4.5998  | 0.2743  | -0.8481 | C | -3.39355 | -3.26342 | -0.656   |
| H  | 3.1383  | 1.1371  | -0.3104 | C | -3.83413 | -1.45203 | 0.90762  |
|    |         |         |         | H | -3.47291 | -0.62028 | 1.53074  |
|    |         |         |         | C | -5.19122 | -1.76426 | 0.87919  |
|    |         |         |         | C | -5.66374 | -2.81426 | 0.09533  |

|                                                          |          |          |          |   |          |          |          |
|----------------------------------------------------------|----------|----------|----------|---|----------|----------|----------|
| C                                                        | -4.778   | -3.5746  | -0.67896 | H | -1.78051 | -4.39648 | 2.34877  |
| C                                                        | -5.22694 | -4.66716 | -1.50208 | H | -2.61277 | -2.91126 | 2.84456  |
| C                                                        | -4.35576 | -5.39369 | -2.24605 | H | -3.54964 | -4.30147 | 2.24812  |
| H                                                        | -4.70303 | -6.22823 | -2.87453 | C | -3.66645 | -1.82622 | -1.15133 |
| H                                                        | -6.30445 | -4.89302 | -1.50658 | H | -4.23352 | -2.64922 | -1.60138 |
| N                                                        | -2.92084 | -2.19198 | 0.14553  | H | -4.22678 | -0.89767 | -1.30171 |
| N                                                        | -1.0887  | -3.71994 | -1.41906 | H | -2.7056  | -1.71532 | -1.66243 |
| H                                                        | -5.87844 | -1.19115 | 1.46587  | C | -4.80156 | -2.10277 | 1.07185  |
| H                                                        | -6.70855 | -3.04461 | 0.08156  | H | -5.34605 | -3.0127  | 0.79235  |
| H                                                        | -0.49299 | -4.03533 | -2.15775 | H | -4.68375 | -2.0883  | 2.15868  |
| H                                                        | -0.90763 | -4.56322 | -0.913   | H | -5.41806 | -1.24185 | 0.78917  |
| H                                                        | -2.26787 | -5.68249 | -2.83435 | C | -1.65453 | 4.4358   | 1.3935   |
| Thermal correction to Energy=0.762546                    |          |          |          | H | -0.93444 | 4.43809  | 2.21926  |
| Thermal correction to Enthalpy=0.763696                  |          |          |          | H | -1.21753 | 4.99392  | 0.56197  |
| Thermal correction to Gibbs Free Energy=0.609668         |          |          |          | H | -2.55693 | 4.95878  | 1.72971  |
| Sum of electronic and zero-point Energies=-1794.942030   |          |          |          | C | -3.01548 | 4.06287  | -1.13264 |
| Sum of electronic and thermal Energies=-1794.884111      |          |          |          | H | -3.59721 | 3.81541  | -2.02696 |
| Sum of electronic and thermal Enthalpies=-1794.882961    |          |          |          | H | -3.49336 | 4.91484  | -0.6371  |
| Sum of electronic and thermal Free Energies=-1795.036989 |          |          |          | H | -2.01346 | 4.36174  | -1.45718 |
| SCF Done: E(RM11L) = -1795.1140425488                    |          |          |          | C | -4.37004 | 2.38602  | 0.15761  |

**TS2'**

**Number of Negative Frequencies =1**

|    |          |          |          |   |          |          |          |
|----|----------|----------|----------|---|----------|----------|----------|
| Ir | 0.26294  | 0.08258  | 0.84806  | C | -2.39089 | 2.19852  | 2.24477  |
| B  | -1.35585 | -1.14569 | 0.76782  | H | -2.59148 | 1.15616  | 1.99072  |
| O  | -1.18007 | -2.54178 | 0.61708  | H | -1.57074 | 2.22328  | 2.97069  |
| O  | -2.7308  | -0.87286 | 0.83372  | H | -3.2797  | 2.63434  | 2.71477  |
| C  | -2.4645  | -3.20115 | 0.68957  | C | 0.3312   | -2.15392 | -3.78181 |
| C  | -3.45629 | -2.03001 | 0.35547  | H | 0.71255  | -2.79739 | -2.9845  |
| O  | -2.35518 | 1.7642   | -1.0024  | H | -0.67361 | -2.50572 | -4.04339 |
| C  | -2.9599  | 2.83336  | -0.22043 | H | 0.97117  | -2.27122 | -4.66489 |
| B  | -1.05986 | 1.56975  | -0.59192 | C | -0.47051 | 0.14475  | -4.39091 |
| C  | -1.97988 | 2.99624  | 1.00693  | H | -0.00411 | 0.07376  | -5.38029 |
| B  | 0.06451  | 0.42885  | -1.3044  | H | -1.50175 | -0.21631 | -4.46987 |
| O  | -0.73826 | 2.38838  | 0.49682  | H | -0.50446 | 1.19749  | -4.09226 |
| O  | -0.48526 | -0.61102 | -2.11839 | C | 2.39411  | 0.63991  | -4.05539 |
| O  | 1.2559   | 0.90644  | -1.94494 | H | 2.61669  | -0.05357 | -4.87524 |
| C  | 0.26815  | -0.69401 | -3.33662 | H | 1.81399  | 1.47637  | -4.4539  |
| C  | 1.64824  | -0.06834 | -2.92643 | H | 3.3446   | 1.03844  | -3.68124 |
| C  | -2.47801 | -4.35785 | -0.30651 | C | 2.58115  | -1.08206 | -2.24422 |
| H  | -1.7515  | -5.12004 | -0.00111 | H | 3.42187  | -0.54417 | -1.7938  |
| H  | -3.46632 | -4.8309  | -0.34814 | H | 2.05769  | -1.61404 | -1.44472 |
| H  | -2.20907 | -4.01979 | -1.31051 | H | 2.98343  | -1.81434 | -2.95399 |
| C  | -2.62199 | -3.73257 | 2.12009  | C | 2.83059  | -1.3167  | 1.36676  |

|                                                          |          |          |          |   |  |          |          |          |                                       |
|----------------------------------------------------------|----------|----------|----------|---|--|----------|----------|----------|---------------------------------------|
| C                                                        | 3.74914  | -2.33523 | 1.48215  |   |  |          |          |          |                                       |
| C                                                        | 3.25868  | 0.01377  | 1.11984  | 6 |  | -2.97843 | 0.65355  | 0.42156  |                                       |
| C                                                        | 2.69453  | 2.22598  | 0.70333  | 6 |  | -2.97768 | -0.65371 | -0.42175 |                                       |
| H                                                        | 1.89745  | 2.94945  | 0.56235  | 6 |  | 2.97823  | 0.65369  | -0.42155 |                                       |
| C                                                        | 4.0549   | 2.59727  | 0.5991   | 6 |  | 2.97791  | -0.65373 | 0.42158  |                                       |
| C                                                        | 5.02966  | 1.63652  | 0.74607  | 5 |  | -0.84902 | 0.00079  | 0.00057  |                                       |
| C                                                        | 4.65134  | 0.29221  | 1.00873  | 5 |  | 0.84904  | 0.00074  | 0.00039  |                                       |
| C                                                        | 5.57828  | -0.77494 | 1.14041  | 8 |  | 1.61113  | -0.72276 | 0.88179  |                                       |
| C                                                        | 5.13353  | -2.06047 | 1.36445  | 8 |  | 1.61132  | 0.72374  | -0.88121 |                                       |
| H                                                        | 5.84411  | -2.87656 | 1.45454  | 8 |  | -1.61068 | -0.72264 | -0.88131 |                                       |
| H                                                        | 6.64007  | -0.56199 | 1.05152  | 8 |  | -1.61174 | 0.72355  | 0.88195  |                                       |
| N                                                        | 2.30419  | 0.98589  | 0.9527   | 6 |  | -3.22433 | -1.90433 | 0.4106   |                                       |
| C                                                        | 0.82866  | -2.84368 | 1.72185  | 1 |  | -4.26846 | -1.9739  | 0.73812  |                                       |
| C                                                        | 1.80862  | -4.02361 | 1.8598   | 1 |  | -2.9946  | -2.78377 | -0.20039 |                                       |
| C                                                        | 3.18203  | -3.80613 | 1.75029  | 1 |  | -2.57748 | -1.93062 | 1.29482  |                                       |
| N                                                        | 1.3143   | -1.5573  | 1.48748  | 6 |  | -3.89752 | -0.64376 | -1.62457 |                                       |
| H                                                        | -0.22488 | -3.01068 | 1.80579  | 1 |  | -3.81523 | -1.59807 | -2.15608 |                                       |
| C                                                        | 4.41464  | 4.06589  | 0.30696  | 1 |  | -4.94266 | -0.51781 | -1.31338 |                                       |
| H                                                        | 4.27202  | 4.26774  | -0.73411 | 1 |  | -3.64052 | 0.15541  | -2.32522 |                                       |
| H                                                        | 3.7843   | 4.70921  | 0.88463  | 6 |  | -3.22553 | 1.90404  | -0.41085 |                                       |
| H                                                        | 5.43757  | 4.24112  | 0.56737  | 1 |  | -4.26955 | 1.97294  | -0.73886 |                                       |
| C                                                        | 6.52347  | 1.98932  | 0.6209   | 1 |  | -2.9967  | 2.78358  | 0.20033  |                                       |
| H                                                        | 6.97814  | 1.96461  | 1.58918  | 1 |  | -2.57826 | 1.93086  | -1.29474 |                                       |
| H                                                        | 7.00545  | 1.27882  | -0.01769 | 6 |  | -3.89893 | 0.64284  | 1.62387  |                                       |
| H                                                        | 6.62473  | 2.96964  | 0.20423  | 1 |  | -3.81761 | 1.59712  | 2.15556  |                                       |
| C                                                        | 1.2722   | -5.44377 | 2.11868  | 1 |  | -4.9438  | 0.51618  | 1.31205  |                                       |
| H                                                        | 1.57133  | -6.08922 | 1.31942  | 1 |  | -3.64177 | -0.15627 | 2.32454  |                                       |
| H                                                        | 1.66855  | -5.81196 | 3.04184  | 6 |  | 3.89832  | -0.64398 | 1.62397  |                                       |
| H                                                        | 0.204    | -5.41685 | 2.17463  | 1 |  | 3.81626  | -1.59837 | 2.15539  |                                       |
| C                                                        | 4.1579   | -4.98943 | 1.88843  | 1 |  | 4.94332  | -0.51803 | 1.31229  |                                       |
| H                                                        | 4.73374  | -5.08342 | 0.9915   | 1 |  | 3.64171  | 0.15509  | 2.32488  |                                       |
| H                                                        | 4.81314  | -4.81657 | 2.71648  | 6 |  | 3.22571  | 1.90406  | 0.41091  |                                       |
| H                                                        | 3.60485  | -5.89046 | 2.05328  | 1 |  | 4.26991  | 1.973    | 0.73829  |                                       |
| Thermal correction to Energy=0.903127                    |          |          |          | 1 |  | 2.99641  | 2.78371  | -0.19996 |                                       |
| Thermal correction to Enthalpy=0.904278                  |          |          |          | 1 |  | 2.57895  | 1.93063  | 1.29518  |                                       |
| Thermal correction to Gibbs Free Energy=0.726600         |          |          |          | 6 |  | 3.89812  | 0.64317  | -1.62434 |                                       |
| Sum of electronic and zero-point Energies=-2066.447527   |          |          |          | 1 |  | 3.81643  | 1.59752  | -2.15588 |                                       |
| Sum of electronic and thermal Energies=-2066.378172      |          |          |          | 1 |  | 4.94317  | 0.51659  | -1.31309 |                                       |
| Sum of electronic and thermal Enthalpies=-2066.377022    |          |          |          | 1 |  | 3.64067  | -0.15586 | -2.32497 |                                       |
| Sum of electronic and thermal Free Energies=-2066.554699 |          |          |          | 6 |  | 3.22411  | -1.90427 | -0.41102 |                                       |
| SCF Done: E(RM11L) = -2067.37494436                      |          |          |          | 1 |  | 4.26802  | -1.97373 | -0.73924 |                                       |
|                                                          |          |          |          | 1 |  | 2.99487  | -2.78377 | 0.20008  |                                       |
|                                                          |          |          |          | 1 |  | 2.57667  | -1.93062 | -1.2948  |                                       |
| <b>B<sub>2</sub>Pin<sub>2</sub></b>                      |          |          |          |   |  |          |          |          |                                       |
|                                                          |          |          |          |   |  |          |          |          | Thermal correction to Energy=0.393992 |

|                                                          |          |          |          |   |          |          |          |
|----------------------------------------------------------|----------|----------|----------|---|----------|----------|----------|
| Thermal correction to Enthalpy=0.395142                  |          |          |          | H | 1.19475  | 0.41848  | -1.54887 |
| Thermal correction to Gibbs Free Energy=0.304019         |          |          |          | C | -3.77151 | 2.40492  | 0.90023  |
| Sum of electronic and zero-point Energies=-822.226944    |          |          |          | C | -4.32806 | 3.4789   | 0.16134  |
| Sum of electronic and thermal Energies=-822.198739       |          |          |          | C | -2.09505 | 4.01621  | -0.58662 |
| Sum of electronic and thermal Enthalpies=-822.197589     |          |          |          | C | -1.64251 | 2.90147  | 0.18573  |
| Sum of electronic and thermal Free Energies=-822.288712  |          |          |          | C | -0.25142 | 2.59535  | 0.18648  |
| SCF Done: E(RB3LYP) = -822.594662061                     |          |          |          | C | 0.64524  | 3.37025  | -0.5172  |
|                                                          |          |          |          | N | -2.48242 | 2.11899  | 0.92068  |
| <b>HBPin</b>                                             |          |          |          | N | 0.19084  | 1.4341   | 0.91917  |
| <b>Number of Negative Frequencies =0</b>                 |          |          |          | C | -1.15458 | 4.79386  | -1.31225 |
| C                                                        | -0.05146 | 3.76227  | -1.29768 | C | 0.18679  | 4.47696  | -1.26872 |
| C                                                        | -1.3445  | 4.2379   | -2.03317 | H | -1.50843 | 5.63947  | -1.8959  |
| B                                                        | -1.85551 | 2.53108  | -0.59136 | H | 0.90763  | 5.0749   | -1.81853 |
| O                                                        | -2.39692 | 3.61848  | -1.23086 | C | -3.48916 | 4.28354  | -0.57518 |
| O                                                        | -0.48625 | 2.44664  | -0.76698 | C | 4.186    | 0.40792  | 0.7015   |
| C                                                        | 1.1622   | 3.61746  | -2.20008 | B | 2.16248  | -0.18152 | -0.25933 |
| H                                                        | 1.39566  | 4.59341  | -2.64283 | H | -4.41837 | 1.7614   | 1.49366  |
| H                                                        | 2.02278  | 3.28458  | -1.61828 | C | 4.41853  | -0.65815 | -0.42585 |
| H                                                        | 0.99863  | 2.89609  | -3.00126 | O | 3.07614  | -1.1635  | -0.65072 |
| C                                                        | 0.29898  | 4.5987   | -0.06414 | O | 2.85004  | 0.87732  | 0.39033  |
| H                                                        | 1.04705  | 4.04907  | 0.51216  | C | 4.8979   | -0.0371  | -1.74328 |
| H                                                        | 0.70752  | 5.57397  | -0.34961 | H | 5.93449  | 0.31047  | -1.67493 |
| H                                                        | -0.58007 | 4.76101  | 0.56923  | H | 4.84069  | -0.79258 | -2.53399 |
| C                                                        | -1.55526 | 5.74707  | -2.0351  | H | 4.26404  | 0.80695  | -2.03392 |
| H                                                        | -0.72658 | 6.24732  | -2.54882 | C | 5.31974  | -1.82346 | -0.03093 |
| H                                                        | -2.48171 | 5.9931   | -2.56537 | H | 5.41898  | -2.51699 | -0.87318 |
| H                                                        | -1.62942 | 6.1466   | -1.02056 | H | 6.3218   | -1.46683 | 0.23432  |
| C                                                        | -1.48181 | 3.66967  | -3.44931 | H | 4.90973  | -2.37859 | 0.81644  |
| H                                                        | -2.49956 | 3.85403  | -3.80867 | C | 4.13877  | -0.2076  | 2.10586  |
| H                                                        | -0.78024 | 4.14427  | -4.14267 | H | 5.13116  | -0.52371 | 2.44441  |
| H                                                        | -1.30538 | 2.58885  | -3.45844 | H | 3.75862  | 0.5407   | 2.81002  |
| H                                                        | -2.58349 | 1.8944   | 0.08472  | H | 3.46806  | -1.07261 | 2.13479  |
| Thermal correction to Energy=0.205041                    |          |          |          | C | 5.14206  | 1.59566  | 0.67754  |
| Thermal correction to Enthalpy=0.206191                  |          |          |          | H | 4.89895  | 2.28378  | 1.49513  |
| Thermal correction to Gibbs Free Energy=0.148281         |          |          |          | H | 6.17762  | 1.26282  | 0.81236  |
| Sum of electronic and zero-point Energies=-411.701648    |          |          |          | H | 5.07069  | 2.14935  | -0.26196 |
| Sum of electronic and thermal Energies=-411.687883       |          |          |          | H | -5.39887 | 3.65381  | 0.18941  |
| Sum of electronic and thermal Enthalpies=-411.686733     |          |          |          | H | -3.87468 | 5.12135  | -1.15068 |
| Sum of electronic and thermal Free Energies= -411.744643 |          |          |          | H | 1.69895  | 3.10798  | -0.50399 |
| SCF Done: E(RM11L) = -411.897595782                      |          |          |          | H | -0.41558 | 1.28614  | 1.73115  |
|                                                          |          |          |          | H | 1.15874  | 1.55596  | 1.23784  |
| <b>TS5a-1</b>                                            |          |          |          | C | -0.98334 | -1.17872 | 1.24233  |
| <b>Number of Negative Frequencies=1</b>                  |          |          |          | C | -2.28927 | -1.62728 | 0.919    |
| Ir                                                       | 0.15652  | -0.28158 | -0.23437 | C | -0.56419 | -1.38609 | 2.5736   |





|   |          |          |          |
|---|----------|----------|----------|
| H | -4.58169 | 4.39882  | 1.90442  |
| H | -3.7023  | 5.75257  | 1.18571  |
| H | 1.82289  | 1.65048  | -1.94404 |
| C | 1.396    | -1.31174 | -1.27073 |
| C | 2.14983  | -1.36998 | -2.4746  |
| C | 1.48801  | -2.47887 | -0.44686 |
| C | 2.9187   | -2.47438 | -2.84264 |
| H | 2.13285  | -0.51421 | -3.1471  |
| C | 2.26876  | -3.59202 | -0.818   |
| C | 2.98376  | -3.60013 | -2.00869 |
| H | 3.47111  | -2.46031 | -3.78085 |
| H | 3.58488  | -4.46251 | -2.28716 |
| C | 2.31235  | -4.80395 | 0.13117  |
| H | 2.66425  | -4.49181 | 1.09224  |
| N | 3.22018  | -5.82246 | -0.41597 |
| C | 2.54287  | -7.12707 | -0.42771 |
| C | 1.19244  | -6.99783 | -1.15656 |
| H | 0.40848  | -6.88355 | -0.43737 |
| H | 1.21439  | -6.14257 | -1.79917 |
| H | 1.01617  | -7.87757 | -1.73956 |
| C | 2.30222  | -7.59356 | 1.02008  |
| H | 2.84433  | -6.96245 | 1.69292  |
| H | 1.25723  | -7.53875 | 1.24342  |
| H | 2.6379   | -8.6036  | 1.12981  |
| C | 3.42439  | -8.15656 | -1.15892 |
| H | 4.39774  | -8.17209 | -0.7148  |
| H | 2.98045  | -9.12685 | -1.0792  |
| H | 3.50747  | -7.88603 | -2.19082 |
| H | 0.93879  | -2.50841 | 0.47096  |

Thermal correction to Energy=0.760929

Thermal correction to Enthalpy=0.762079

Thermal correction to Gibbs Free Energy=0.601551

Sum of electronic and zero-point Energies=-1726.918153

Sum of electronic and thermal Energies= -1726.859490

Sum of electronic and thermal Enthalpies= -1726.858340

Sum of electronic and thermal Free Energies=-1727.018869

SCF Done: E(RM11L)= -1727.73962871692

- (1) M. J. Frisch, G. W. Trucks, H. B. Schlegel, G. E. Scuseria, M. A. Robb, J. R. Cheeseman, Scalmani, G.; Barone, V.; Mennucci, B.; Petersson, G. A.; Nakatsuji, H.; Caricato, M.; Li, X.; Hratchian, H. P.; Izmaylov, A. F.; Bloino, J.; Zheng, G.; Sonnenberg, J. L.; Hada, M.; Ehara, M.; Toyota, K.; Fukuda, R.; Hasegawa, J.; Ishida, M.; Nakajima, T.; Honda, Y.; Kitao, O.; Nakai, H.; Vreven, T.; Montgomery, J. A.; Peralta, Jr., J. E.; Ogliaro, F.; Bearpark, M.; Heyd, J. J.; Brothers, E.; Kudin, K. N.; Staroverov, V. N.; Kobayashi, R.; Normand, J.; Raghavachari, K.; Rendell, A.; Burant, J. C.; Iyengar, S. S.; Tomasi, J.; Cossi, M.; Rega, N.; Millam, J. M.; Klene, M.; Knox, J. E.; Cross, J. B.; Bakken, V.; Adamo, C.; Jaramillo, J.; Gomperts, R.; Stratmann, R. E.; Yazyev, O.; Austin, A. J.; Cammi, R.; Pomelli, C.; Ochterski, J. W.; Martin, R. L.; Morokuma, K.; Zakrzewski, V. G.; Voth, G. A.; Salvador, P.; Dannenberg, J. J.; Dapprich, S.; Daniels, A. D.; Farkas, Ö.; Foresman, J. B.; Ortiz, J. V.; Cioslowski, J.; Fox, D. J. *Gaussian 09*, Gaussian, Inc., Wallingford CT, 2009.
- (2) (a) C. Lee, W. Yang, R. G. Parr, *Phys. Rev. B* 1988, **37**, 785; (b) Becke, A. D. *J. Chem. Phys.*, 1993, **98**, 5648.
- (3) M. Dolg, U. Wedig, H. Stoll, H. Preuss, *J. Chem. Phys.*, 1987, **86**, 866.
- (4) (a) P. C. Hariharan, J. A. Pople, *Theor. Chem. Acc.*, 1973, **28**, 213. (b) Frisch, M. J.; Pople, J. A.; Binkley, J. S. *J. Chem. Phys.*, 1984, **80**, 3265.
- (5) A. V. Marenich, C. J. Cramer, D. G. Truhlar, *J. Phys. Chem. B.*, 2009, **113**, 6378.
- (6) R. Peverati, D. G. Truhlar, *J. Phys. Chem. Lett.*, 2012, **3**, 117.
